# Supplementary material
Source: Research Square preprint supplement (doi:10.21203/rs.3.rs-8265099/v1)
Supplement: Supplementary file 1 [file 1220d1f0fb70547d5cea2096.docx]

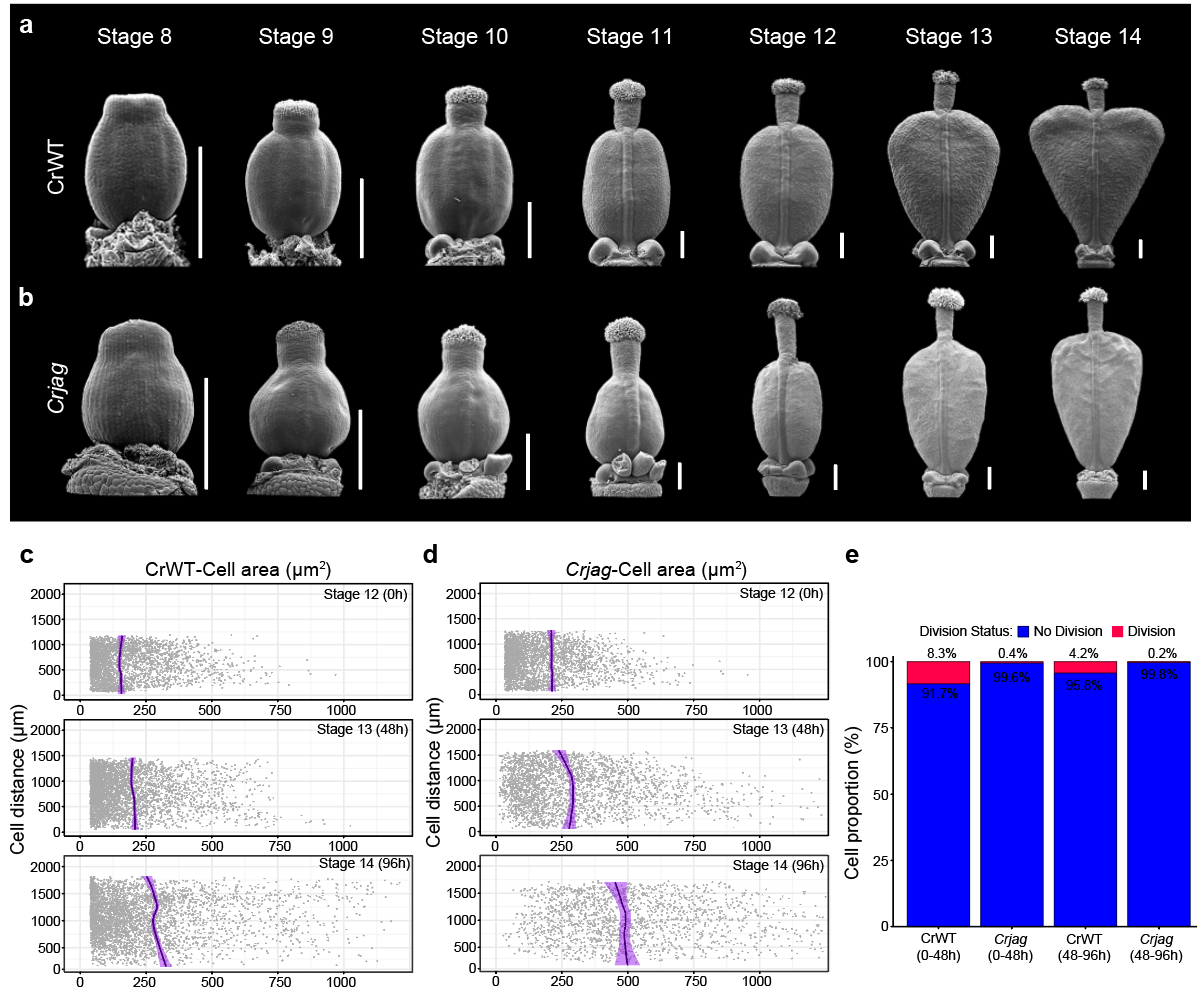
**Extended Data Fig. 1**

**Extended Data Fig. 2**


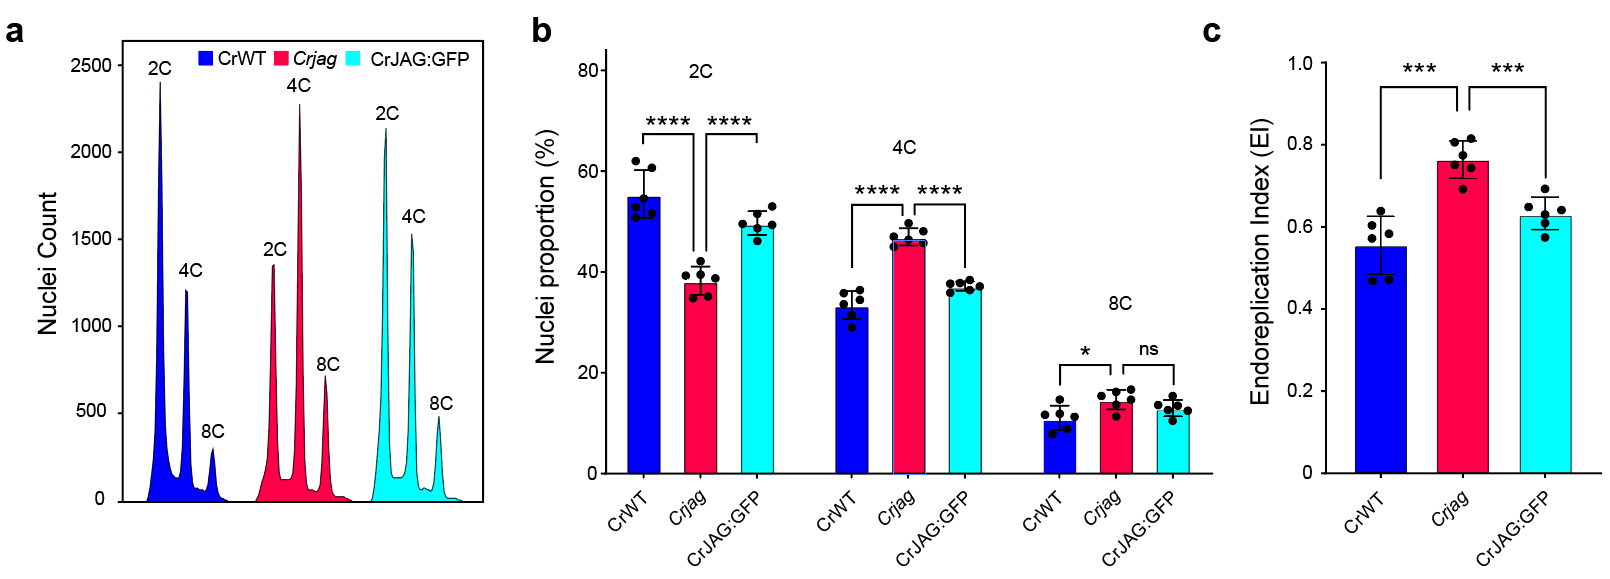


**Extended Data Fig. 3**


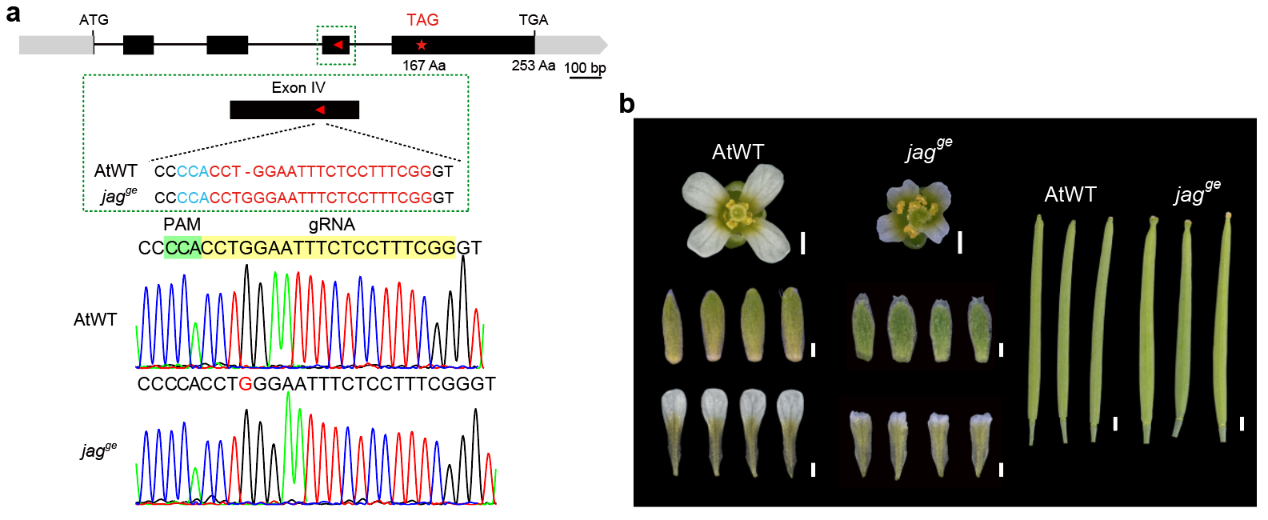


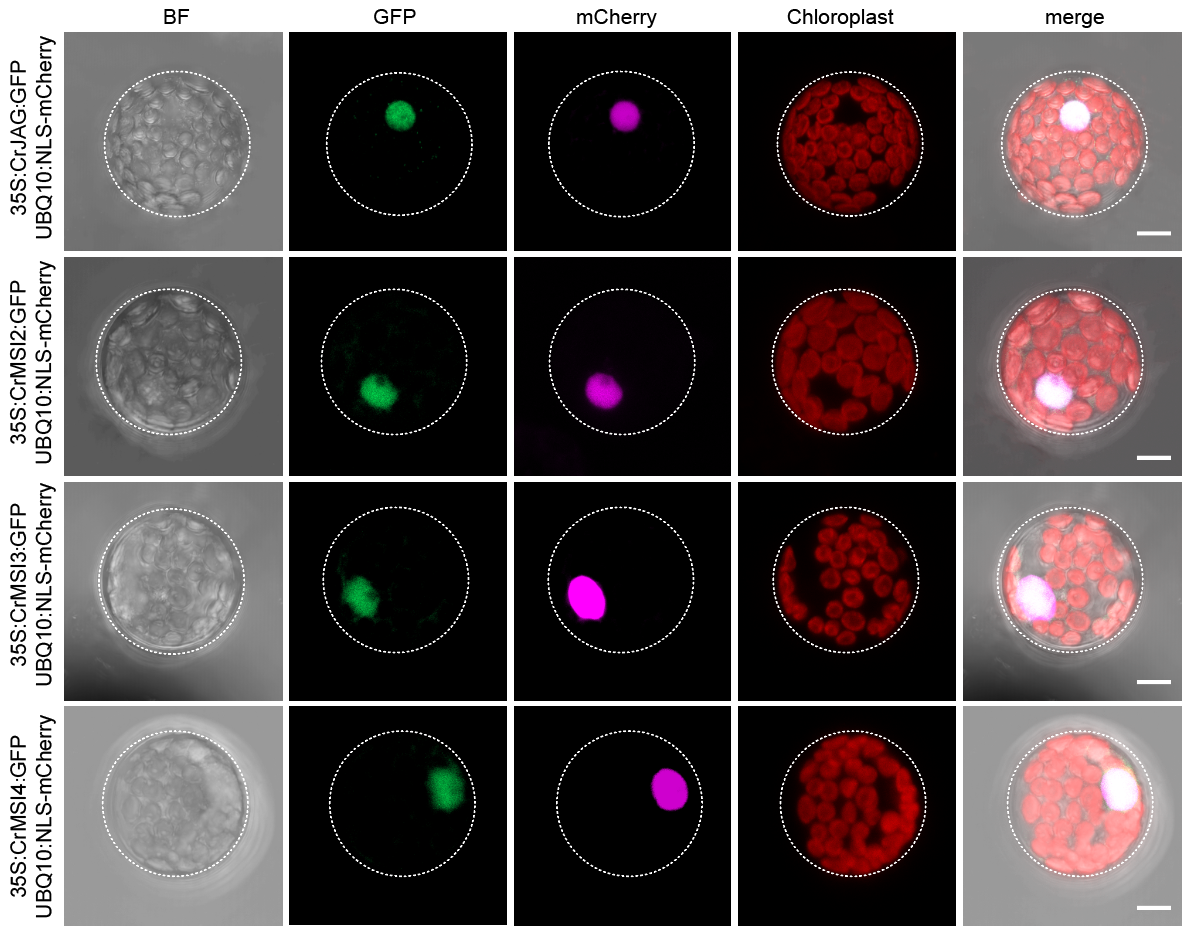
**Extended Data Fig. 4**

**Extended Data Fig. 5**


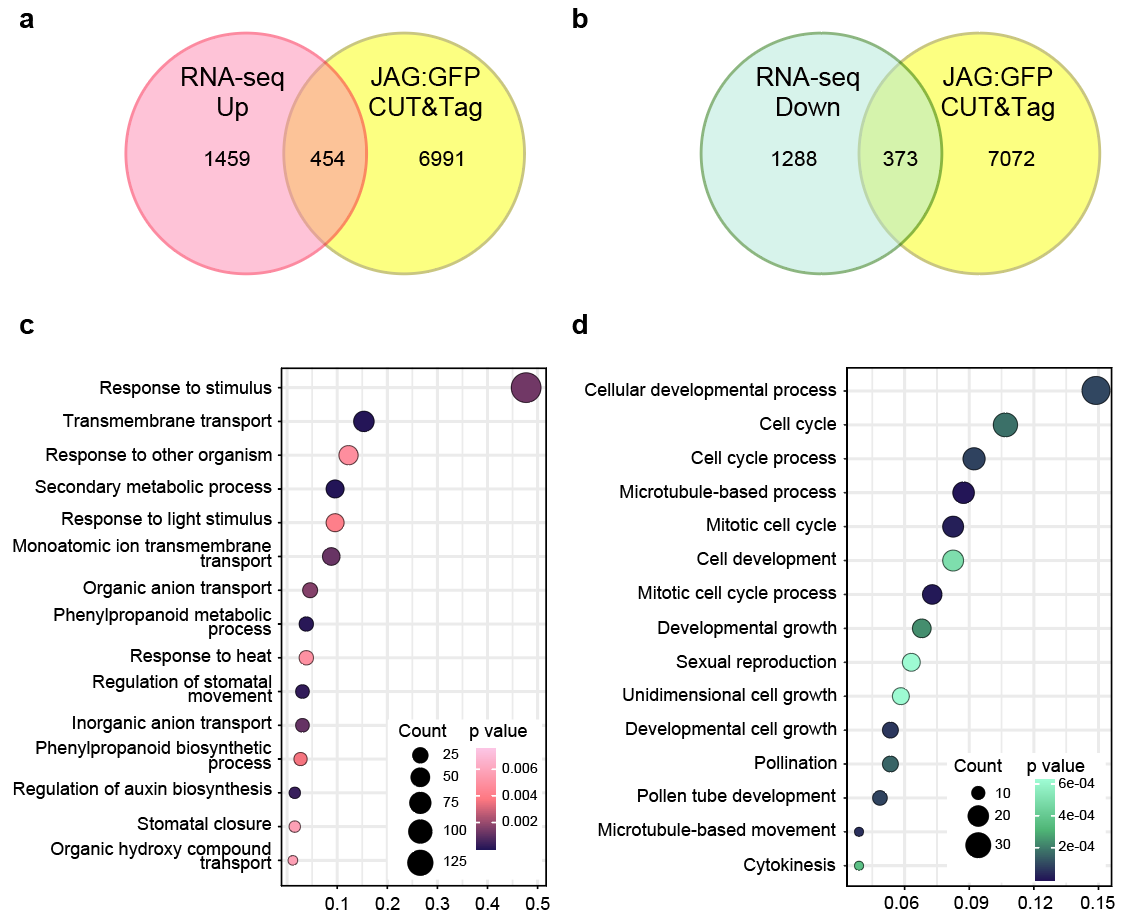


**Extended Data Fig. 6**


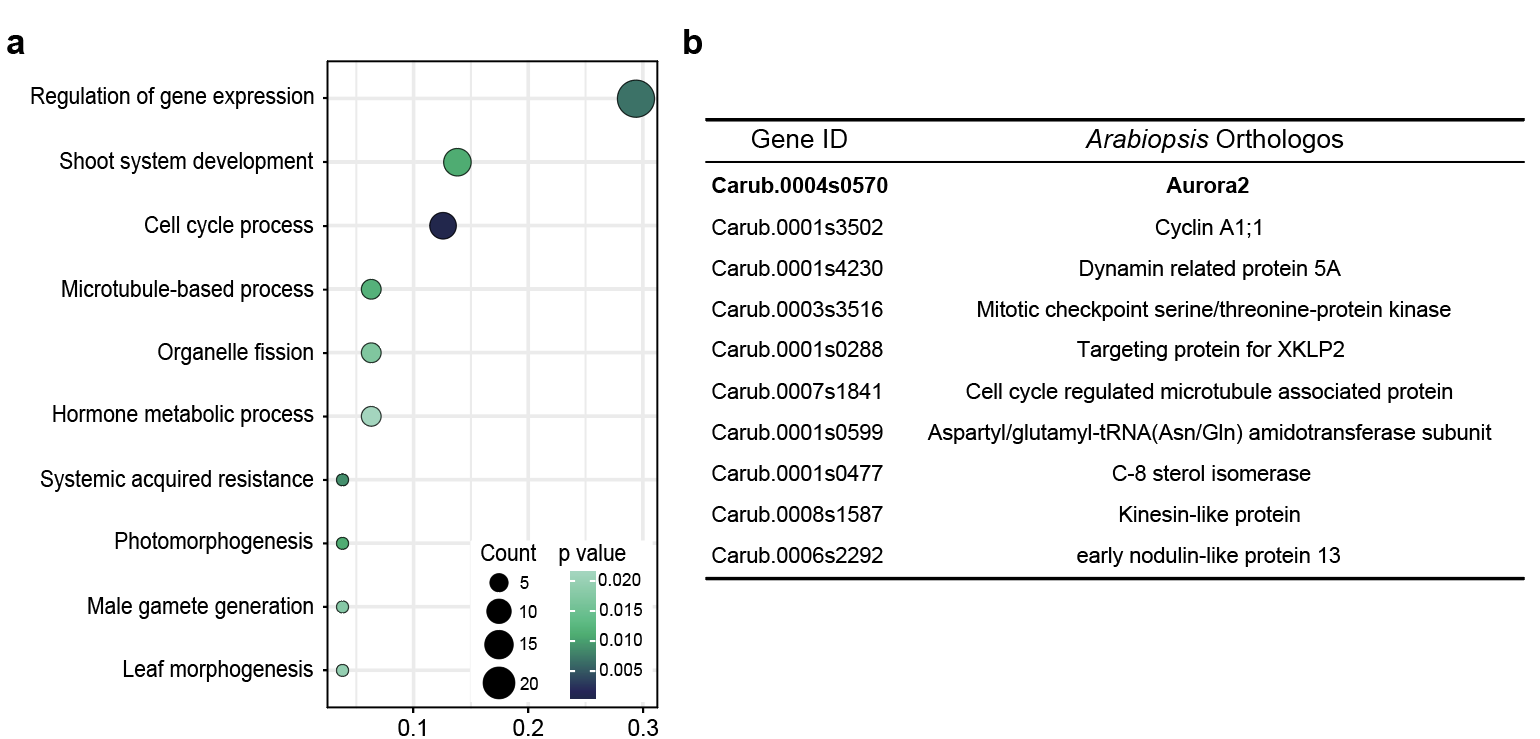


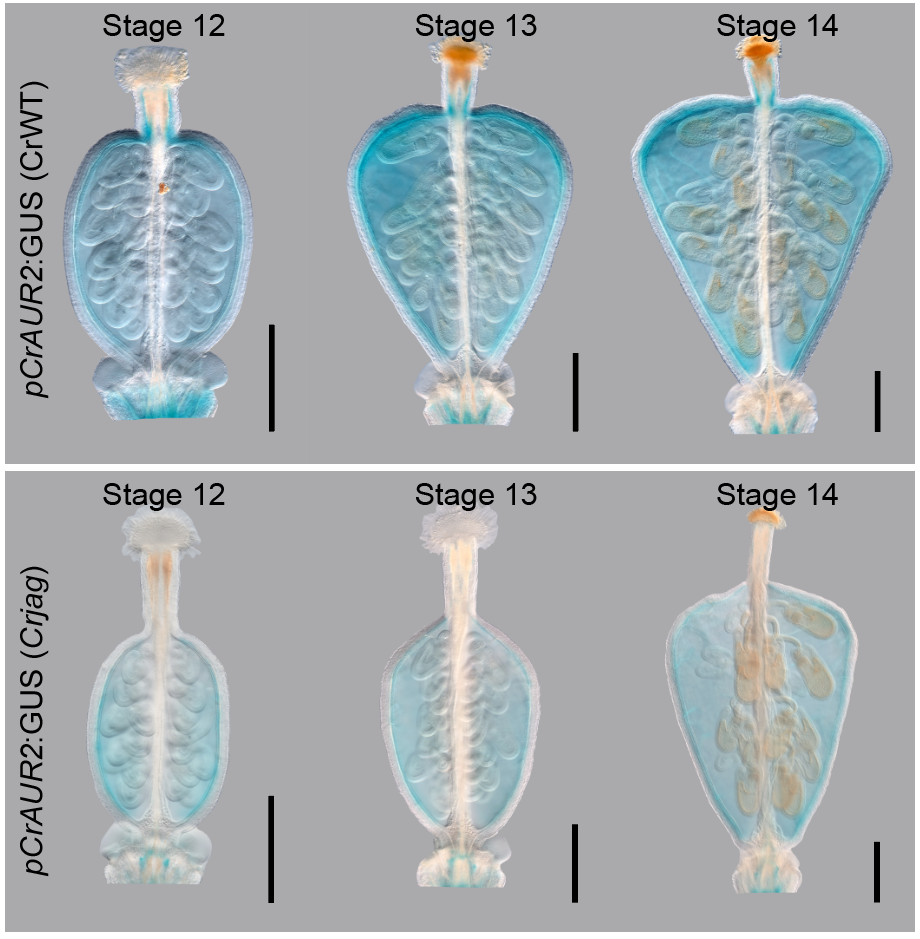
**Extended Data Fig. 7**


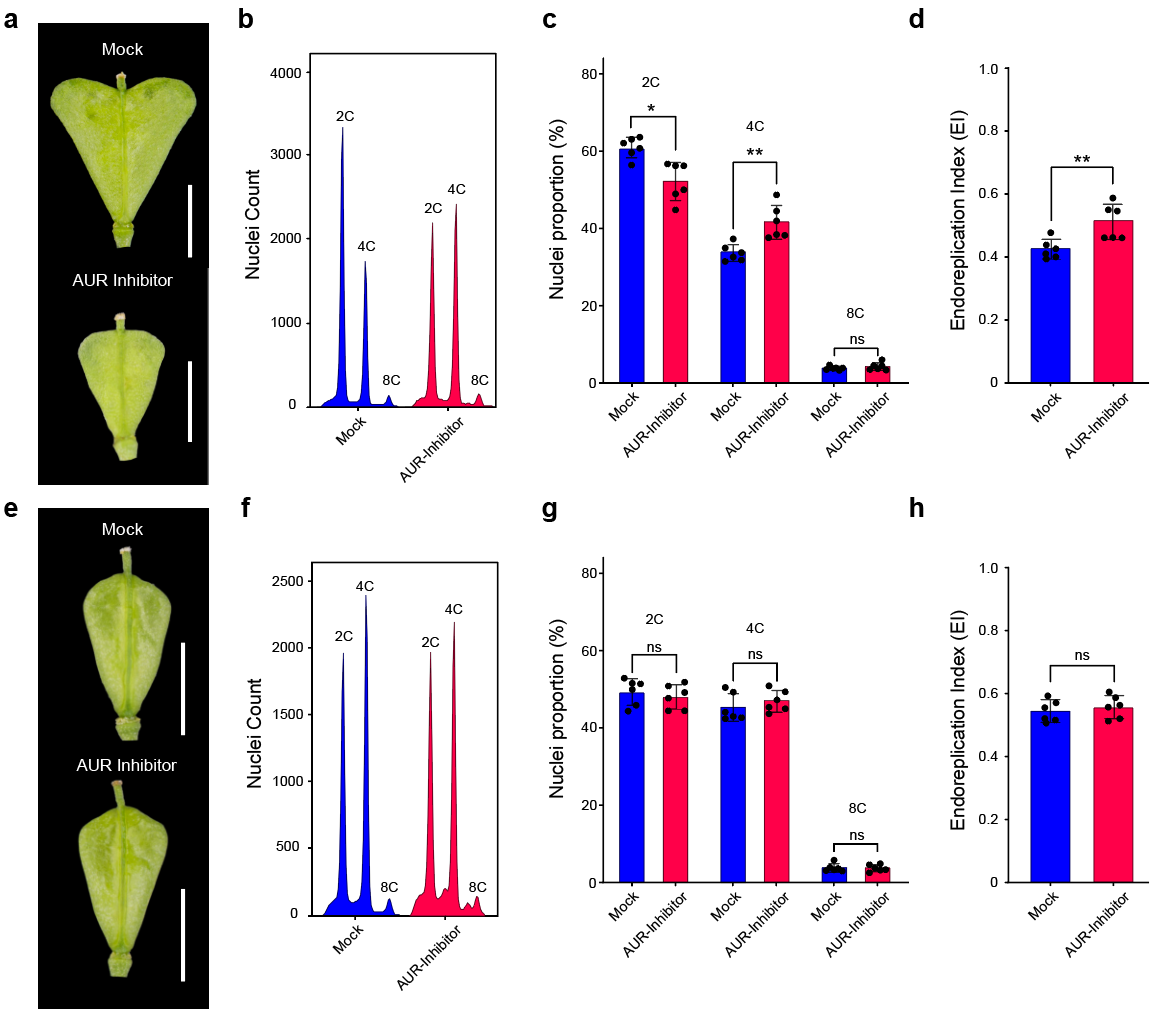
**Extended Data Fig. 8**
