# Supplementary material
Source: Research Square preprint supplement (doi:10.21203/rs.3.rs-8265099/v1)
Supplement: Supplementary file 2 [file 449806c58c9703440d965f77.xlsx]

## Sheet: 454 up-regulated targets
Cr.ID	At.ID	Name	Description	log2(Fold Change)	FDR
Carub.0003s1695	AT1G47990	GA2OX4	gibberellin 2-oxidase 4	7.60474	3.39029e-08
Carub.0004s1043	AT2G29370	-	NAD(P)-binding Rossmann-fold superfamily protein	6.9964	2.75277e-07
Carub.0002s1700	AT1G65300	AGL38	AGAMOUS-like 38	6.84745	0.040555
Carub.0004s2438	AT2G40910	-	F-box and associated interaction domains-containing protein	6.40871	3.88808e-05
Carub.0003s1639	AT3G16660	-	Pollen Ole e 1 allergen and extensin family protein	6.22419	5.43074e-07
Carub.0003s3093	AT1G03410	2A6	2-oxoglutarate (2OG) and Fe(II)-dependent oxygenase superfamily protein	5.97241	0.000429141
Carub.0004s0896	AT1G20680	-	Transport and Golgi organisation protein 2	5.87798	0.0128587
Carub.0003s2598	AT4G16900	-	Disease resistance protein (TIR-NBS-LRR class) family	5.82631	3.93566e-46
Carub.0001s1615	AT1G16410	CYP79F1	cytochrome p450 79f1	5.8201	1.89713e-29
Carub.0004s1185	AT5G65940	CHY1	beta-hydroxyisobutyryl-CoA hydrolase 1	5.81428	4.56964e-33
Carub.0007s2562	AT4G15990	-	unknown protein; UPF0145 domain superfamily	5.61665	0.0020617
Carub.0006s1174	AT5G13580	ABCG6	ABC-2 type transporter family protein	5.56092	0.00367722
Carub.0004s1018	AT2G29170	-	NAD(P)-binding Rossmann-fold superfamily protein; SENESCENCE-ASSOCIATED PROTEIN 13	5.54853	0.00298478
Carub.0007s2670	AT4G15248	BBX30	B-box type zinc finger family protein	5.32976	0.00507959
Carub.0006s2723	AT3G17230	-	plant invertase/pectin methylesterase inhibitor superfamily protein	5.15759	0.0101857
Carub.0003s2688	AT5G25290	-	F-box protein (DUF295)	5.07388	0.0148516
Carub.0001s3999	AT1G51090	HMAD1	Heavy metal transport/detoxification superfamily protein	5.07171	0.0130296
Carub.0001s3068	AT1G20680	-	Transport and Golgi organisation protein 2	4.77064	1.35158e-07
Carub.0003s2279	AT3G22640	PAP85	cupin family protein	4.75194	0.0354788
Carub.0006s2550	AT4G29550	-	unknown protein (DUF626); CYSTATIN DOMAIN-CONTAINING PROTEIN	4.74119	0.0358264
Carub.0008s1739	AT1G47128	RD21A	Granulin repeat cysteine protease family protein	4.58619	4.89483e-07
Carub.0004s2822	AT2G45580	CYP76C3	cytochrome P450, family 76, subfamily C, polypeptide 3	4.5297	6.47815e-08
Carub.0006s2408	AT5G26280	-	TRAF-like family protein	4.36487	0.00521663
Carub.0005s1345	AT3G47380	PMEI11	Plant invertase/pectin methylesterase inhibitor superfamily protein	4.35758	4.79029e-32
Carub.0008s0712	AT5G42180	PER64	Peroxidase superfamily protein	4.35693	7.20641e-301
Carub.0008s0164	AT5G46260	-	disease resistance protein (TIR-NBS-LRR class) family	4.31682	4.39192e-18
Carub.0001s2562	AT1G24485	-	Malectin-like domain-containing protein	4.28937	0.00417326
Carub.0005s2682	AT3G60090	-	VQ motif-containing protein	4.28535	8.41478e-05
Carub.0001s1513	AT1G15360	SHN1	Integrase-type DNA-binding superfamily protein	4.15917	2.11722e-61
Carub.0005s0425	AT2G02580	CYP71B9	cytochrome P450, family 71, subfamily B, polypeptide 9	4.10364	0.0309715
Carub.0008s2240	AT5G15000	-	ECA1 gametosis family protein	4.10154	0.00194126
Carub.0005s1985	AT3G53300	CYP71B31	cytochrome P450, family 71, subfamily B, polypeptide 31	4.06141	7.29155e-08
Carub.0007s3700	AT5G02900	CYP96A13	cytochrome P450, family 96, subfamily A, polypeptide 13	4.03255	8.7293e-24
Carub.0001s1942	AT1G19900	-	glyoxal oxidase-related protein	3.98582	0.0125439
Carub.0006s3239	AT4G04570	CRK40	cysteine-rich RLK (RECEPTOR-like protein kinase) 40	3.97083	4.80185e-08
Carub.0003s2378	AT3G23570	-	alpha/beta-Hydrolases superfamily protein	3.78009	0.00297172
Carub.0006s0540	AT5G06510	NF-YA10	nuclear factor Y, subunit A10	3.75935	1.18404e-17
Carub.0005s1796	AT3G51600	LTP5	lipid transfer protein 5	3.75231	4.48143e-67
Carub.0001s2064	AT1G21210	WAK4	wall associated kinase 4	3.74874	0.0228928
Carub.0008s0593	AT5G11250	BNT1	Disease resistance protein (TIR-NBS-LRR class); BURNOUT1	3.71405	3.52964e-06
Carub.0005s1597	AT1G62120	-	Mitochondrial transcription termination factor family protein	3.66851	0.0291164
Carub.0003s1080	AT3G11480	BSMT1	S-adenosyl-L-methionine-dependent methyltransferases superfamily protein	3.62658	1.33846e-06
Carub.0003s2308	AT2G16600	ROC3	rotamase CYP 3	3.60307	0.0016788
Carub.0006s1825	AT5G19880	-	Peroxidase superfamily protein	3.56822	5.71555e-93
Carub.0007s1435	AT4G26530	FBA5	Aldolase superfamily protein	3.56697	1.59574e-35
Carub.0006s1409	AT5G15900	TBL19	TRICHOME BIREFRINGENCE-LIKE 19	3.54377	1.47346e-06
Carub.0008s0366	AT5G44630	-	Terpenoid cyclases/Protein prenyltransferases superfamily protein	3.46082	6.48382e-24
Carub.0007s2269	AT4G18540	-	unknown protein	3.3945	0.00151878
Carub.0007s2146	AT4G19690	IRT1	iron-regulated transporter 1	3.36514	4.66657e-13
Carub.0004s2548	AT2G43010	PIF4	phytochrome interacting factor 4	3.3358	3.77753e-13
Carub.0007s2700	AT2G21930	-	F-box associated ubiquitination effector family protein	3.32193	0.00882142
Carub.0002s0247	AT1G62510	-	Bifunctional inhibitor/lipid-transfer protein/seed storage 2S albumin superfamily protein	3.31828	5.4486e-18
Carub.0005s1490	AT3G48740	SWEET11	Nodulin MtN3 family protein	3.30775	1.65827e-34
Carub.0008s1982	AT5G59130	SBT4.11	Subtilase family protein SBT4.11	3.3049	2.02862e-14
Carub.0001s4116	AT1G52191	-	Thioesterase superfamily protein	3.29345	1.59265e-05
Carub.0007s2006	AT4G21380	RK3	receptor kinase 3	3.27308	1.07161e-13
Carub.0007s0376	AT1G75250	RL6	RAD-like 6	3.2675	2.82887e-05
Carub.0006s0924	AT5G10760	AED1	Eukaryotic aspartyl protease family protein; APOPLASTIC, EDS1-DEPENDENT 1	3.26414	9.22376e-28
Carub.0004s0875	AT2G27990	BLH8	BEL1-like homeodomain 8	3.2578	1.97219e-08
Carub.0001s2966	AT1G31260	ZIP10	zinc transporter 10	3.24248	1.90481e-06
Carub.0006s1301	AT5G14860	-	UDP-Glycosyltransferase superfamily protein	3.23717	7.11554e-22
Carub.0002s1158	AT1G04645	-	Plant self-incompatibility protein S1 family	3.23635	1.87638e-20
Carub.0006s2685	AT4G08290	UMAMIT20	nodulin MtN21 /EamA-like transporter family protein	3.21343	1.3113e-23
Carub.0008s0560	AT5G43120	-	ARM-repeat/Tetratricopeptide repeat (TPR)-like protein	3.20928	0.000104986
Carub.0002s1746	AT1G70720	-	Plant invertase/pectin methylesterase inhibitor superfamily protein	3.20813	1.3386e-05
Carub.0006s1478	AT5G16570	GLN1;4	glutamine synthetase 1;4	3.19404	3.82361e-39
Carub.0002s2059	AT1G73830	BEE3	BR enhanced expression 3	3.16909	4.07473e-18
Carub.0001s2830	AT1G30080	-	Glycosyl hydrolase superfamily protein	3.16492	1.16645e-92
Carub.0006s2074	AT5G22970	-	unknown protein	3.15527	5.11138e-17
Carub.0002s2144	AT1G74650	MYB31	myb domain protein 31	3.15469	4.89652e-34
Carub.0003s0054	AT3G01530	MYB57	myb domain protein 57	3.15097	5.2266e-07
Carub.0001s1811	AT4G02655	-	unknown protein	3.13685	7.63474e-28
Carub.0007s2869	AT4G13770	CYP83A1	cytochrome P450, family 83, subfamily A, polypeptide 1	3.11135	1.20629e-26
Carub.0004s1039	AT2G29340	-	NAD-dependent epimerase/dehydratase family protein; TROPINONE REDUCTASE I	3.09486	2.1325e-05
Carub.0007s2017	AT4G21250	-	Sulfite exporter TauE/SafE family protein	3.08372	0.00433352
Carub.0007s2762	AT1G20680	-	Transport and Golgi organisation protein 2	3.07879	9.70075e-09
Carub.0001s2098	AT1G21540	-	Acyl-activating enzyme 10-related	3.04058	1.47303e-25
Carub.0006s3703	AT4G00190	PME38	pectin methylesterase 38	3.01875	2.7982e-07
Carub.0006s3080	AT4G11653	RALFL29	RALF-like 29	3.01061	3.00733e-49
Carub.0004s1182	AT2G30670	-	NAD(P)-binding Rossmann-fold superfamily protein	3.00644	3.05149e-13
Carub.0003s3100	AT2G17070	-	unknown protein	2.98235	0.0278405
Carub.0002s2366	AT1G76750	EC1.1	egg cell-secreted-like protein (DUF1278)	2.97442	1.08451e-07
Carub.0006s2836	AT2G22930	-	UDP-Glycosyltransferase superfamily protein	2.94766	0.000968186
Carub.0005s1464	AT3G48460	-	GDSL-like Lipase/Acylhydrolase superfamily protein	2.92216	1.1859e-194
Carub.0003s3370	AT2G19410	-	U-box domain-containing protein 34	2.90833	0.021919
Carub.0008s1983	AT5G59120	SBT4.13	subtilase 4.13	2.90774	3.38696e-09
Carub.0008s2423	AT5G52975	-	egg cell-secreted-like protein (DUF1278)	2.90011	6.8922e-10
Carub.0001s2639	AT1G27940	ABCB13	P-glycoprotein 13	2.88109	5.90806e-86
Carub.0008s1079	AT5G50800	SWEET13	Nodulin MtN3 family protein	2.87804	1.37933e-07
Carub.0006s3687	AT5G23212	-	Defensin-like (DEFL) family protein	2.86288	2.8443e-07
Carub.0006s1291	AT5G14740	CA2	carbonic anhydrase 2	2.84753	7.31813e-152
Carub.0004s0963	AT1G54950	-	unknown protein	2.84476	0.0223421
Carub.0004s2196	AT2G39850	-	Subtilisin-like serine endopeptidase family protein	2.8308	6.27171e-10
Carub.0004s2970	AT2G46970	PIL1	phytochrome interacting factor 3-like 1	2.80423	3.04394e-10
Carub.0003s0521	AT3G05858	-	unknown protein	2.7872	1.78164e-09
Carub.0006s2361	AT5G25840	-	DUF1677 family protein (DUF1677)	2.77518	6.43516e-11
Carub.0001s0543	AT1G06090	-	Fatty acid desaturase family protein	2.77097	4.42475e-60
Carub.0001s4477	AT5G48920	TED7	tracheary element differentiation-related 7	2.75913	2.17941e-07
Carub.0008s0893	AT5G49130	bige1b	MATE efflux family protein	2.75224	3.43639e-32
Carub.0005s1542	AT3G49190	-	O-acyltransferase (WSD1-like) family protein	2.73051	0.00690511
Carub.0002s1414	AT1G67710	ARR11	response regulator 11	2.72325	1.28099e-50
Carub.0004s0070	AT2G21650	MEE3	Homeodomain-like superfamily protein	2.68476	1.60537e-08
Carub.0001s4067	AT1G51780	ILL5	IAA-amino acid hydrolase ILR1-like 5	2.68402	0.0100254
Carub.0001s2258	AT1G23060	MDP40	unknown protein	2.68284	1.22915e-08
Carub.0003s2181	AT3G21760	HYR1	UDP-Glycosyltransferase superfamily protein	2.65739	7.06372e-74
Carub.0005s2335	AT3G56610	-	prolamin-like protein	2.64547	4.31944e-09
Carub.0008s2398	AT5G63225	-	Carbohydrate-binding X8 domain superfamily protein	2.62547	1.84613e-29
Carub.0008s2394	AT5G63180	-	Pectin lyase-like superfamily protein	2.60872	7.24946e-146
Carub.0004s0011	AT2G21080	-	unknown protein	2.60419	6.10549e-13
Carub.0002s0931	AT1G57775	-	ECA1 gametosis family protein	2.5999	3.09894e-13
Carub.0006s3113	AT4G12030	BAT5	bile acid transporter 5	2.59874	1.93301e-20
Carub.0003s2135	AT3G21320	-	EARLY FLOWERING protein	2.59217	3.48978e-16
Carub.0006s3686	AT4G00360	CYP86A2	cytochrome P450, family 86, subfamily A, polypeptide 2	2.59128	6.8218e-174
Carub.0004s0516	AT2G25482	-	prolamin-like protein (DUF784)	2.58882	1.27263e-08
Carub.0007s1768	AT4G23493	-	unknown protein	2.58495	8.36136e-20
Carub.0002s2774	AT1G79770	-	CASP-like protein (DUF1677)	2.57654	0.00178177
Carub.0002s0218	AT1G62800	ASP4	aspartate aminotransferase 4	2.5604	2.15138e-09
Carub.0002s0089	AT1G63950	-	Heavy metal transport/detoxification superfamily protein	2.5546	8.69558e-05
Carub.0003s2418	AT3G23880	-	F-box and associated interaction domains-containing protein	2.55336	0.000216259
Carub.0002s0617	AT1G58370	RXF12	glycosyl hydrolase family 10 protein / carbohydrate-binding domain-containing protein	2.54105	6.1959e-82
Carub.0006s1653	AT5G18240	MYR1	myb-related protein 1	2.52434	7.11264e-21
Carub.0002s1159	AT1G04645	-	Plant self-incompatibility protein S1 family	2.51761	1.6071e-09
Carub.0007s1434	AT4G26540	RGI3	Leucine-rich repeat receptor-like protein kinase family protein; RGF1 INSENSITIVE 3	2.48962	8.77425e-46
Carub.0005s2964	AT3G62990	-	unknown protein	2.48803	0.0109613
Carub.0007s2813	AT4G16900	-	Disease resistance protein (TIR-NBS-LRR class) family	2.48089	1.14837e-64
Carub.0006s2021	AT5G22470	PARP3	poly ADP-ribose polymerase 3	2.45443	8.52803e-28
Carub.0007s1428	AT4G26590	OPT5	oligopeptide transporter 5	2.43004	1.12041e-69
Carub.0007s0744	AT4G33040	-	Thioredoxin superfamily protein	2.42655	5.10352e-47
Carub.0001s0214	AT1G03010	-	Phototropic-responsive NPH3 family protein	2.42492	1.98635e-05
Carub.0002s2581	AT1G78960	LUP2	lupeol synthase 2	2.40412	3.88195e-12
Carub.0005s0824	AT3G29670	PMAT2	HXXXD-type acyl-transferase family protein	2.39784	0.000590224
Carub.0005s0550	AT3G27250	-	unknown protein	2.38937	2.29013e-11
Carub.0003s3147	AT2G17430	MLO7	Seven transmembrane MLO family protein	2.34663	0.00243138
Carub.0006s0956	AT5G11050	MYB64	myb domain protein 64	2.33041	0.0244163
Carub.0119s0001	AT1G35710	-	kinase family with leucine-rich repeat domain-containing protein	2.32756	1.69132e-85
Carub.0008s2780	AT5G66700	HB53	homeobox 53	2.31901	5.07543e-07
Carub.0006s2271	AT5G24860	FPF1	flowering promoting factor 1	2.30843	0.0129706
Carub.0008s1804	AT5G57550	XTH25	xyloglucan endotransglucosylase/hydrolase 25	2.30562	0.000832343
Carub.0006s2348	AT5G25610	RD22	BURP domain-containing protein	2.30231	1.49067e-140
Carub.0002s1248	AT5G12020	HSP17.6II	17.6 kDa class II heat shock protein	2.29009	1.87994e-06
Carub.0007s3706	AT5G38800	bZIP43	basic leucine-zipper 43	2.2887	0.00313022
Carub.0006s1009	AT5G11610	-	Exostosin family protein	2.28747	1.29987e-05
Carub.0006s3679	AT4G00467	-	Calcium-dependent lipid-binding (CaLB domain) family protein	2.27864	4.94857e-06
Carub.0001s3477	AT1G43790	TED6	tracheary element differentiation-related 6	2.2754	5.93153e-24
Carub.0003s3087	AT2G17000	-	Mechanosensitive ion channel protein 7	2.26152	1.17852e-18
Carub.0002s2739	AT1G80130	-	Tetratricopeptide repeat (TPR)-like superfamily protein	2.2609	2.17499e-10
Carub.0007s1014	AT4G30450	-	glycine-rich protein	2.25721	7.05738e-08
Carub.0002s2519	AT1G78290	SNRK2-8	Protein kinase superfamily protein	2.25666	1.45289e-27
Carub.0001s1557	AT1G15780	NRB4	mediator of RNA polymerase II transcription subunit 15a-like protein	2.23845	2.86081e-26
Carub.0002s2656	AT1G79700	WRI4	Integrase-type DNA-binding superfamily protein	2.23469	5.72222e-12
Carub.0006s2188	AT5G24150	SQP1	FAD/NAD(P)-binding oxidoreductase family protein	2.22934	1.02024e-103
Carub.0007s1758	AT1G65342	-	unknown protein	2.20481	0.0047962
Carub.0002s0480	AT1G60410	-	F-box family protein	2.19975	0.000101726
Carub.0001s0865	AT1G09310	-	plant/protein (Protein of unknown function, DUF538)	2.18322	2.14498e-166
Carub.0001s2277	AT1G23200	PME6	Pectin Methylesterase6	2.18078	0.00321247
Carub.0003s1953	AT3G19660	-	unknown protein	2.17733	0.0493021
Carub.0002s2273	AT5G44420	PDF1.2	plant defensin 1.2	2.16856	4.13772e-07
Carub.0006s2786	AT4G09350	NdhT	Chaperone DnaJ-domain superfamily protein	2.16801	7.99522e-30
Carub.0003s2898	AT2G38530	LTP2	lipid transfer protein 2	2.14878	1.56221e-66
Carub.0005s1527	AT3G49070	-	unknown protein (DUF677)	2.14826	0.000227598
Carub.0002s1461	AT1G68130	IDD14	indeterminate(ID)-domain 14	2.13062	4.22072e-21
Carub.0001s2190	AT1G22370	UGT85A5	UDP-glucosyl transferase 85A5	2.12581	2.7086e-20
Carub.0002s1627	AT1G69600	ZFHD1	zinc finger homeodomain 1	2.09418	1.23151e-13
Carub.0001s2406	AT1G26920	-	T2P11.11 protein	2.08955	4.10819e-19
Carub.0003s3452	AT5G16530	PIN5	Auxin efflux carrier family protein	2.08866	5.40944e-05
Carub.0001s2257	AT1G23050	-	hydroxyproline-rich glycoprotein family protein	2.08455	4.46848e-05
Carub.0002s1031	AT1G65170	-	Ubiquitin carboxyl-terminal hydrolase family protein	2.08292	0.0408948
Carub.0001s0708	AT1G07720	KCS3	3-ketoacyl-CoA synthase 3	2.07756	3.95007e-75
Carub.0001s2774	AT1G29450	SAUR64	SMALL AUXIN UPREGULATED RNA 64	2.07445	0.0216582
Carub.0007s0383	AT4G36470	-	S-adenosyl-L-methionine-dependent methyltransferases superfamily protein	2.07434	0.00058326
Carub.0007s2679	AT4G15160	-	Bifunctional inhibitor/lipid-transfer protein/seed storage 2S albumin superfamily protein	2.07115	0.0132191
Carub.0007s1430	AT4G26580	-	RING/U-box superfamily protein	2.06463	0.000194298
Carub.0006s0307	AT5G04120	-	Phosphoglycerate mutase family protein	2.05683	0.000490991
Carub.0007s3736	AT1G66100	-	Plant thionin	2.05452	0.00936265
Carub.0001s2972	AT1G31290	AGO3	ARGONAUTE 3	2.04906	1.90361e-10
Carub.0003s2621	AT2G04570	-	GDSL-like Lipase/Acylhydrolase superfamily protein	2.0483	3.77489e-42
Carub.0001s0405	AT2G32690	GRP23	glycine-rich protein 23	2.03726	6.27021e-59
Carub.0002s1954	AT1G72690	-	unknown protein	2.02268	2.84852e-08
Carub.0007s2064	AT4G20800	BBE17	FAD-binding Berberine family protein	2.01483	3.06284e-20
Carub.0001s4226	AT1G53100	-	Core-2/I-branching beta-1,6-N-acetylglucosaminyltransferase family protein	2.01284	3.11554e-08
Carub.0003s1505	AT3G15353	MT3	metallothionein 3	2.0031	7.60857e-37
Carub.0006s1823	AT5G19870	-	unknown protein (DUF716)	2.00121	3.81018e-05
Carub.0003s0653	AT3G07010	-	Pectin lyase-like superfamily protein	1.99453	5.28708e-89
Carub.0006s1048	AT5G11940	-	Subtilase family protein	1.9915	6.25771e-13
Carub.0001s4328	AT1G54050	-	HSP20-like chaperones superfamily protein	1.99095	7.16205e-10
Carub.0002s2582	AT1G78960	LUP2	lupeol synthase 2	1.97958	1.55376e-36
Carub.0002s1947	AT1G72630	ELF4-L2	ELF4-like 2	1.97812	1.78456e-24
Carub.0005s0623	AT3G27690	LHCB2.3	photosystem II light harvesting complex protein 2.3	1.97321	8.5168e-12
Carub.0004s1238	AT2G31110	-	trichome birefringence-like protein (DUF828)	1.97203	1.2245e-150
Carub.0005s2268	AT3G55940	-	Phosphoinositide-specific phospholipase C family protein	1.96778	1.48711e-09
Carub.0001s4202	AT1G52870	-	Peroxisomal membrane 22 kDa (Mpv17/PMP22) family protein	1.9526	1.42604e-84
Carub.0001s0065	AT1G01600	CYP86A4	cytochrome P450, family 86, subfamily A, polypeptide 4	1.92861	5.30892e-09
Carub.0007s2099	AT4G20140	GSO1	Leucine-rich repeat transmembrane protein kinase	1.92529	1.80146e-15
Carub.0005s2573	AT3G58990	IPMI1	isopropylmalate isomerase 1	1.92477	1.30458e-25
Carub.0005s0945	AT3G43790	ZIFL2	zinc induced facilitator-like 2	1.92413	5.41675e-41
Carub.0005s2728	AT3G60550	CYCP3;2	cyclin p3;2	1.92375	6.92087e-08
Carub.0007s0495	AT4G35350	XCP1	xylem cysteine peptidase 1	1.91953	1.96119e-48
Carub.0001s3001	AT1G31710	-	Copper amine oxidase family protein	1.9188	1.11215e-13
Carub.0006s3045	AT4G11480	CRK32	cysteine-rich RLK (RECEPTOR-like protein kinase) 32	1.91109	0.00711579
Carub.0007s2575	AT4G15910	DI21	drought-induced 21	1.91028	2.1038e-18
Carub.0008s0599	AT5G11250	BNT1	Disease resistance protein (TIR-NBS-LRR class); BURNOUT1	1.89175	0.000415385
Carub.0006s1240	AT5G14200	IMD1	isopropylmalate dehydrogenase 1	1.8901	3.51326e-06
Carub.0001s1981	AT1G20310	-	syringolide-induced protein	1.88856	8.78787e-08
Carub.0003s3054	AT2G16740	UBC29	ubiquitin-conjugating enzyme 29	1.88731	1.50757e-13
Carub.0007s3407	AT5G41410	BEL1	POX (plant homeobox) family protein	1.88459	2.31596e-66
Carub.0005s2689	AT3G60160	ABCC9	multidrug resistance-associated protein 9	1.881	1.95482e-51
Carub.0006s2837	AT2G22930	-	UDP-Glycosyltransferase superfamily protein	1.87489	7.89554e-11
Carub.0004s1184	AT2G30670	-	NAD(P)-binding Rossmann-fold superfamily protein	1.87417	1.198e-07
Carub.0005s2582	AT3G59060	PIL6	phytochrome interacting factor 3-like 6	1.87217	3.26701e-15
Carub.0002s2442	AT1G77520	-	O-methyltransferase family protein	1.86056	2.45742e-28
Carub.0002s2496	AT1G78070	-	Transducin/WD40 repeat-like superfamily protein	1.84803	7.92413e-07
Carub.0004s1077	AT2G29670	-	Tetratricopeptide repeat (TPR)-like superfamily protein	1.814	1.23598e-24
Carub.0005s0522	AT3G27025	-	unknown protein	1.80332	6.5772e-10
Carub.0002s1005	AT1G64940	CYP89A6	cytochrome P450, family 87, subfamily A, polypeptide 6	1.78645	1.82314e-39
Carub.0004s2005	AT2G38080	IRX12	Laccase/Diphenol oxidase family protein	1.77177	1.78546e-88
Carub.0008s0288	AT3G50020	-	Serine protease inhibitor, potato inhibitor I-type family protein	1.76895	1.30389e-07
Carub.0001s2546	AT1G24625	ZFP7	zinc finger protein 7	1.75888	9.52396e-24
Carub.0003s1042	AT3G11110	-	RING/U-box superfamily protein	1.75406	1.26392e-11
Carub.0007s1500	AT4G25950	VATG3	vacuolar ATP synthase G3	1.73073	0.000450877
Carub.0005s1119	AT3G45310	-	Cysteine proteinases superfamily protein	1.72895	1.35019e-60
Carub.0005s0412	AT3G26220	CYP71B3	cytochrome P450, family 71, subfamily B, polypeptide 3	1.72712	1.533e-11
Carub.0001s3002	AT1G31720	MWL1	MODIFYING WALL LIGNIN-1 (DUF1218)	1.72127	0.00137361
Carub.0003s3226	AT2G18120	SRS4	SHI-related sequence 4	1.71351	0.004252
Carub.0007s2538	AT3G17100	AIF3	sequence-specific DNA binding transcription factor; ATBS1 Interacting Factor 3	1.71138	1.57814e-28
Carub.0004s1770	AT2G35950	EDA12	embryo sac development arrest 12	1.70556	0.000857392
Carub.0001s2261	AT1G23090	AST91	sulfate transporter 91	1.70507	7.01768e-06
Carub.0004s1180	AT2G30650	-	ATP-dependent caseinolytic (Clp) protease/crotonase family protein	1.70393	2.7681e-07
Carub.0004s0711	AT4G32660	AME3	Protein kinase superfamily protein	1.7037	5.97152e-05
Carub.0004s1111	AT2G30010	TBL45	TRICHOME BIREFRINGENCE-LIKE 45	1.70297	1.01521e-123
Carub.0004s2139	AT2G39350	ABCG1	ABC-2 type transporter family protein	1.69676	1.43712e-24
Carub.0002s1710	AT1G70410	BCA4	beta carbonic anhydrase 4	1.69352	2.22834e-06
Carub.0005s1826	AT3G51910	HSFA7A	heat shock transcription factor A7A	1.69214	0.0138619
Carub.0008s2551	AT5G64700	UMAMIT21	nodulin MtN21 /EamA-like transporter family protein	1.69031	5.35336e-06
Carub.0002s0656	AT1G58070	-	unknown protein	1.68904	7.33833e-11
Carub.0001s3342	AT1G35710	-	kinase family with leucine-rich repeat domain-containing protein	1.67328	1.76307e-07
Carub.0003s1098	AT3G11660	NHL1	NDR1/HIN1-like 1	1.6715	6.9757e-55
Carub.0008s0369	AT5G44620	CYP706A3	cytochrome P450, family 706, subfamily A, polypeptide 3	1.66589	0.0243336
Carub.0004s2853	AT2G45830	DTA2	downstream target of AGL15 2	1.6592	1.37988e-18
Carub.0002s2002	AT1G73220	OCT1	organic cation/carnitine transporter1	1.65272	1.50939e-56
Carub.0003s2088	AT3G20898	-	unknown protein	1.65103	0.0103812
Carub.0006s0328	AT5G04340	CZF2	COLD INDUCED ZINC FINGER PROTEIN 2	1.65093	1.24172e-05
Carub.0008s0682	AT5G08055	-	Defensin-like (DEFL) family protein	1.64907	4.7852e-09
Carub.0008s0952	AT5G49660	XIP1	Leucine-rich repeat transmembrane protein kinase family protein	1.64602	1.24672e-42
Carub.0008s0358	AT5G44680	-	DNA glycosylase superfamily protein	1.64454	4.94663e-12
Carub.0004s1181	AT2G30660	-	ATP-dependent caseinolytic (Clp) protease/crotonase family protein	1.64271	5.60603e-07
Carub.0002s1465	AT1G68170	UMAMIT23	nodulin MtN21 /EamA-like transporter family protein	1.64029	5.69269e-15
Carub.0003s0514	AT3G05770	-	unknown protein	1.64012	0.0499787
Carub.0001s2558	AT1G24530	-	Transducin/WD40 repeat-like superfamily protein	1.63883	7.66844e-10
Carub.0002s2234	AT1G75460	-	ATP-dependent protease La (LON) domain protein	1.63499	1.66988e-30
Carub.0005s0729	AT3G28740	CYP81D11	Cytochrome P450 superfamily protein	1.62925	0.0120201
Carub.0002s1030	AT3G04710	TPR10	ankyrin repeat family protein	1.62891	0.000191975
Carub.0004s1853	AT2G36710	-	Pectin lyase-like superfamily protein	1.62707	3.95746e-07
Carub.0005s0582	AT3G05420	ACBP4	acyl-CoA binding protein 4	1.62521	9.71589e-11
Carub.0007s2884	AT4G13660	PRR2	pinoresinol reductase 2	1.62026	2.66743e-45
Carub.0007s2233	AT4G18850	-	unknown protein	1.61945	0.00285557
Carub.0008s0598	AT5G38350	-	Disease resistance protein (NBS-LRR class) family	1.61731	0.00169175
Carub.0002s2271	AT5G44420	PDF1.2	plant defensin 1.2	1.6123	0.00602622
Carub.0004s0547	AT2G25680	MOT1	molybdate transporter 1	1.61033	5.37862e-07
Carub.0024s0018	AT5G01880	DAFL2	RING/U-box superfamily protein; DAF-Like gene 2	1.60992	0.0008819
Carub.0002s1654	AT1G69850	NRT1:2	nitrate transporter 1:2	1.60234	2.73339e-73
Carub.0004s2349	AT2G41180	SIB2	VQ motif-containing protein	1.60065	6.04774e-05
Carub.0007s2478	AT4G16620	UMAMIT8	nodulin MtN21 /EamA-like transporter family protein	1.59883	1.37091e-14
Carub.0004s2222	AT2G40080	ELF4	EARLY FLOWERING-like protein (DUF1313)	1.58273	7.41276e-20
Carub.0006s1904	AT5G20700	-	unknown protein (DUF581); FCS-LIKE ZINC FINGER 14	1.5794	1.13367e-92
Carub.0007s2179	AT4G19420	PAE8	Pectinacetylesterase family protein; pectin acetylesterase 8	1.57778	1.28508e-87
Carub.0007s3749	AT1G66100	-	Plant thionin	1.57378	2.47733e-06
Carub.0005s2173	AT3G55100	ABCG17	ABC-2 type transporter family protein	1.57082	1.94681e-08
Carub.0008s0597	AT5G11250	BNT1	Disease resistance protein (TIR-NBS-LRR class); BURNOUT1	1.5649	0.0126859
Carub.0007s1252	AT4G28240	-	Wound-induced protein (DUF3774)	1.55962	3.24189e-21
Carub.0004s1818	AT2G36380	ABCG34	pleiotropic drug resistance 6	1.5595	2.19938e-156
Carub.0005s1695	AT3G50630	KRP2	KIP-related protein 2	1.55662	1.63794e-17
Carub.0003s0516	AT3G05800	AIF1	AtBS1(activation-tagged BRI1 suppressor 1)-interacting factor 1	1.55527	3.60454e-16
Carub.0003s2546	AT3G25130	-	unknown protein	1.55292	9.66152e-47
Carub.0004s1055	AT2G29500	-	HSP20-like chaperones superfamily protein	1.54796	1.4043e-08
Carub.0028s0001	AT5G29000	PHL1	Homeodomain-like superfamily protein	1.547	0.0206655
Carub.0003s2551	AT3G25180	CYP82G1	cytochrome P450, family 82, subfamily G, polypeptide 1	1.54619	1.05287e-17
Carub.0003s3191	AT2G17770	BZIP27	basic region/leucine zipper motif 27	1.54377	5.2225e-11
Carub.0002s0005	AT1G64680	-	unknown protein	1.5324	1.45549e-72
Carub.0007s1249	AT4G28270	RMA2	RING membrane-anchor 2	1.5299	5.75153e-12
Carub.0001s3092	AT1G32510	NAC011	NAC domain containing protein 11	1.52494	0.00703913
Carub.0005s2743	AT3G60690	SAUR59	SMALL AUXIN UPREGULATED RNA 59	1.52429	1.91417e-07
Carub.0003s0427	AT3G05030	NHX2	sodium hydrogen exchanger 2	1.52069	5.68797e-37
Carub.0004s0738	AT2G26870	NPC2	non-specific phospholipase C2	1.50364	0.00158721
Carub.0006s2300	AT5G25180	CYP71B14	cytochrome P450, family 71, subfamily B, polypeptide 14	1.50362	0.000274855
Carub.0001s1853	AT1G18880	NRT1.9	Major facilitator superfamily protein	1.50309	1.63993e-13
Carub.0005s2053	AT3G53950	-	glyoxal oxidase-related protein	1.49984	1.57945e-29
Carub.0003s1593	AT3G16180	NRT1.12	Major facilitator superfamily protein; nitrate transporter 1.12	1.49299	1.29133e-60
Carub.0002s2522	AT1G78320	GSTU23	glutathione S-transferase TAU 23	1.4885	3.50146e-18
Carub.0007s2178	AT4G19430	-	unknown protein	1.48498	2.68126e-14
Carub.0007s3241	AT1G24340	EMB2421	FAD/NAD(P)-binding oxidoreductase family protein	1.48154	2.56223e-25
Carub.0008s2346	AT5G62730	NPF4.7	Major facilitator superfamily protein	1.48072	8.56996e-05
Carub.0001s2787	AT1G29660	-	GDSL-like Lipase/Acylhydrolase superfamily protein	1.47785	5.76307e-32
Carub.0008s2624	AT5G65390	AGP7	arabinogalactan protein 7	1.47779	0.000649249
Carub.0005s2913	AT3G62410	CP12-2	CP12 domain-containing protein 2	1.4775	2.59089e-24
Carub.0004s1898	AT2G37090	IRX9	Nucleotide-diphospho-sugar transferases superfamily protein	1.46638	2.35378e-06
Carub.0007s3444	AT5G41050	-	Pollen Ole e 1 allergen and extensin family protein	1.46575	4.42084e-16
Carub.0001s0460	AT2G21860	-	violaxanthin de-epoxidase-like protein	1.45497	0.0467989
Carub.0004s1117	AT2G30070	KT1	potassium transporter 1	1.45434	9.37354e-11
Carub.0006s3313	AT4G05180	PSBQ-2	photosystem II subunit Q-2	1.44989	2.05343e-166
Carub.0001s2032	AT1G20850	XCP2	xylem cysteine peptidase 2	1.44959	1.69665e-104
Carub.0004s2880	AT2G46100	-	Nuclear transport factor 2 (NTF2) family protein	1.4477	1.22586e-11
Carub.0008s1638	AT5G56050	-	late embryosis abundant (LEA) hydroxyproline-rich glycoprotein family protein	1.44609	2.7767e-06
Carub.0007s3272	AT5G37550	-	unknown protein; DUF4005 DOMAIN-CONTAINING PROTEIN	1.44533	0.0136585
Carub.0007s0931	AT4G31240	NRX2	protein kinase C-like zinc finger protein; nucleoredoxin 2	1.44504	2.4376e-16
Carub.0004s2368	AT2G41370	BOP2	Ankyrin repeat family protein / BTB/POZ domain-containing protein	1.44488	0.00344373
Carub.0006s3570	AT4G01500	NGA4	AP2/B3-like transcriptional factor family protein	1.44179	0.0113154
Carub.0006s2882	AT2G16450	-	F-box and associated interaction domains-containing protein	1.44025	0.017984
Carub.0006s2762	AT4G09030	AGP10	arabinogalactan protein 10	1.43791	5.19961e-16
Carub.0001s1177	AT1G62480	-	Vacuolar calcium-binding protein-like protein	1.43407	8.25961e-14
Carub.0002s2397	AT1G77090	-	thylakoid lumenal protein (Mog1/PsbP/DUF1795-like photosystem II reaction center PsbP family protein)	1.43268	3.31295e-22
Carub.0006s0574	AT5G06850	FTIP1	C2 calcium/lipid-binding plant phosphoribosyltransferase family protein	1.42292	1.81959e-24
Carub.0003s1613	AT3G16380	PAB6	poly(A) binding protein 6	1.42238	2.10108e-09
Carub.0006s2869	AT4G10120	SPS4F	Sucrose-phosphate synthase family protein	1.40879	7.08403e-29
Carub.0008s1785	AT5G57340	-	unknown protein; DNA binding protein	1.40678	7.71799e-07
Carub.0008s1819	AT5G57685	GDU3	glutamine dumper 3	1.40573	7.37946e-22
Carub.0002s2525	AT1G78360	GSTU21	glutathione S-transferase TAU 21	1.4012	0.00077932
Carub.0003s3014	AT2G16380	-	Sec14p-like phosphatidylinositol transfer family protein	1.40005	0.000485788
Carub.0008s2155	AT5G60850	OBP4	OBF binding protein 4	1.3968	6.75824e-13
Carub.0008s2343	AT5G62680	NPF2.11	Major facilitator superfamily protein	1.39665	4.36466e-67
Carub.0008s1658	AT5G56260	-	Ribonuclease E inhibitor RraA/Dimethylmenaquinone methyltransferase	1.39481	2.05858e-15
Carub.0001s3815	AT1G09560	GLP5	germin-like protein 5	1.39254	0.047864
Carub.0004s2936	AT2G46650	CB5-C	cytochrome B5	1.39174	1.38248e-06
Carub.0008s2072	AT5G60020	LAC17	laccase 17	1.38614	9.67374e-26
Carub.0008s0961	AT5G49740	FRO7	ferric reduction oxidase 7	1.38539	7.24044e-29
Carub.0007s2632	AT4G15540	UMAMIT38	EamA-like transporter family	1.38261	2.03804e-32
Carub.0005s2849	AT3G61750	-	Cytochrome b561/ferric reductase transmembrane with DOMON related domain-containing protein	1.38079	5.94916e-09
Carub.0007s2234	AT4G18850	-	unknown protein	1.37744	0.00148835
Carub.0007s3760	AT5G38410	RBCS3B	Ribulose bisphosphate carboxylase (small chain) family protein	1.37248	1.75703e-25
Carub.0002s1750	AT1G70760	NdhL	inorganic carbon transport protein-like protein	1.36809	1.79851e-25
Carub.0004s0037	AT2G21330	FBA1	fructose-bisphosphate aldolase 1	1.36797	4.73063e-57
Carub.0005s2150	AT3G54890	LHCA1	chlorophyll a-b binding protein 6	1.36337	5.31057e-28
Carub.0001s0129	AT2G41610	-	unknown protein	1.3596	0.00208132
Carub.0001s1219	AT1G12480	OZS1	C4-dicarboxylate transporter/malic acid transport protein	1.35956	2.93969e-08
Carub.0002s0088	AT1G63960	-	Copper transport protein family	1.35697	0.0323979
Carub.0006s2360	AT5G25830	GATA12	GATA transcription factor 12	1.35453	5.74641e-07
Carub.0003s1209	AT3G12730	-	Homeodomain-like superfamily protein	1.34535	9.0621e-20
Carub.0006s1952	AT5G21430	NdhU	Chaperone DnaJ-domain superfamily protein	1.34531	1.46673e-29
Carub.0001s0589	AT1G06520	GPAT1	glycerol-3-phosphate acyltransferase 1	1.33939	7.71688e-13
Carub.0002s2223	AT5G58980	NCER3	Neutral/alkaline non-lysosomal ceramidase; Neutral Ceramidase3	1.33684	9.23919e-08
Carub.0007s3514	AT5G40450	RBB1	A-kinase anchor-like protein; Regulator of bulb biogenesis1	1.33526	1.00672e-08
Carub.0008s1592	AT5G55560	-	Protein kinase superfamily protein	1.33026	0.000676281
Carub.0006s0535	AT5G06470	-	Glutaredoxin family protein	1.32472	0.00022823
Carub.0003s1928	AT3G19480	PGDH3	D-3-phosphoglycerate dehydrogenase	1.32261	5.19129e-22
Carub.0002s2678	AT1G80760	NIP6;1	NOD26-like intrinsic protein 6;1	1.32148	8.18824e-05
Carub.0006s0474	AT5G05840	-	unknown protein (DUF620)	1.31795	2.56891e-09
Carub.0005s0493	AT3G26840	PES2	Esterase/lipase/thioesterase family protein	1.31664	1.89302e-14
Carub.0007s0707	AT4G33420	Prx47	Peroxidase superfamily protein; Peroxidase 47	1.31261	2.50581e-14
Carub.0002s1945	AT1G72610	GER1	germin-like protein 1	1.31068	5.17701e-51
Carub.0002s1730	AT1G70580	AOAT2	alanine-2-oxoglutarate aminotransferase 2	1.30472	6.32342e-38
Carub.0006s3144	AT4G12320	CYP706A6	cytochrome P450, family 706, subfamily A, polypeptide 6	1.30366	2.98325e-18
Carub.0007s2998	AT4G12830	-	alpha/beta-Hydrolases superfamily protein	1.30358	2.97597e-71
Carub.0007s0133	AT4G39410	WRKY13	WRKY DNA-binding protein 13	1.29922	8.69429e-05
Carub.0002s2392	AT1G77000	SKP2B	RNI-like superfamily protein	1.29881	1.23972e-49
Carub.0006s1953	AT5G21482	CKX7	cytokinin oxidase 7	1.295	9.89964e-13
Carub.0004s1076	AT2G29660	-	zinc finger (C2H2 type) family protein	1.2915	2.64588e-51
Carub.0003s0306	AT3G03870	-	unknown protein	1.28601	8.2159e-27
Carub.0001s4201	AT1G52855	-	Zinc ribbon 15 domain-containing protein	1.27703	0.00180056
Carub.0004s2179	AT2G39730	RCA	rubisco activase	1.27697	1.75868e-20
Carub.0002s2023	AT1G73500	MKK9	MAP kinase kinase 9	1.27223	6.2267e-09
Carub.0001s3214	AT1G34050	-	Ankyrin repeat family protein	1.26834	1.45032e-12
Carub.0007s2774	AT4G14480	BLUS1	Protein kinase superfamily protein; BLUE LIGHT SIGNALING1	1.26752	0.0359645
Carub.0007s0662	AT4G33820	-	Glycosyl hydrolase superfamily protein	1.25449	0.0206364
Carub.0007s1862	AT4G22690	CYP706A1	cytochrome P450, family 706, subfamily A, polypeptide 1	1.2532	2.2283e-32
Carub.0002s1875	AT1G71970	-	unknown protein	1.24887	4.49846e-15
Carub.0006s0270	AT5G03790	HB51	homeobox 51	1.24088	8.13905e-10
Carub.0001s4099	AT1G52080	AR791	actin binding protein family	1.23962	3.44564e-25
Carub.0007s2486	AT4G16563	-	PEPTIDASE A1 domain containing protein	1.23862	0.0489395
Carub.0001s3526	AT1G26795	-	Plant self-incompatibility protein S1 family	1.23773	6.27118e-05
Carub.0008s2282	AT5G62150	-	peptidoglycan-binding LysM domain-containing protein	1.23723	0.0308151
Carub.0005s2922	AT3G62570	-	Tetratricopeptide repeat (TPR)-like superfamily protein	1.23664	3.8101e-39
Carub.0005s2258	AT3G55800	SBPASE	sedoheptulose-bisphosphatase	1.23047	1.60198e-35
Carub.0007s3740	AT5G38510	-	Rhomboid-related intramembrane serine protease family protein	1.22777	1.05446e-11
Carub.0007s0228	AT4G37930	SHM1	serine transhydroxymethyltransferase 1	1.22289	2.57332e-47
Carub.0008s2177	AT5G61100	-	RING_FYVE_PHD zinc finger superfamily protein	1.22077	0.000546509
Carub.0008s1078	AT5G50790	SWEET10	Nodulin MtN3 family protein	1.21959	9.37789e-39
Carub.0006s1254	AT5G14360	-	Ubiquitin-like superfamily protein	1.2181	4.64608e-05
Carub.0007s1911	AT4G22200	KT2/3	potassium transport 2/3	1.21792	1.11862e-39
Carub.0008s2533	AT5G64530	XND1	xylem NAC domain 1	1.21027	0.000109738
Carub.0004s0267	AT2G23440	-	unknown protein	1.2099	0.000320188
Carub.0007s1513	AT4G25830	CASPL2C1	Uncharacterized protein family (UPF0497); CASP-like protein 2C1	1.20713	1.3705e-24
Carub.0004s1599	AT2G34340	-	unknown protein (DUF584)	1.20688	0.026457
Carub.0004s2546	AT2G42990	-	GDSL-like Lipase/Acylhydrolase superfamily protein	1.2062	1.80671e-08
Carub.0002s0648	AT5G10530	LecRK-IX.1	Concanavalin A-like lectin protein kinase family protein; L-type lectin receptor kinase IX.1	1.20127	0.0172446
Carub.0001s1344	AT1G13700	PGL1	6-phosphogluconolactonase 1	1.19952	2.426e-14
Carub.0002s2240	AT1G75540	BBX21	salt tolerance homolog2	1.1984	1.34026e-14
Carub.0008s2648	AT5G14890	-	potassium transporter; NHL domain-containing protein	1.19714	0.0218636
Carub.0007s2136	AT4G19850	PP2-A2	lectin-like protein	1.18519	0.00130954
Carub.0001s2389	AT1G27080	NRT1.6	nitrate transporter 1.6	1.18372	2.87519e-19
Carub.0003s2230	AT3G22120	CWLP	cell wall-plasma membrane linker protein	1.18315	6.05303e-26
Carub.0003s2380	AT3G23590	RFR1	REF4-related 1	1.17466	5.21673e-91
Carub.0002s2741	AT1G80110	PP2-B11	phloem protein 2-B11	1.16626	1.15389e-09
Carub.0008s1377	AT5G53590	SAUR30	SAUR-like auxin-responsive protein family; SMALL AUXIN UPREGULATED RNA 30	1.16117	2.75132e-05
Carub.0002s1255	AT5G61480	PXY	Leucine-rich repeat protein kinase family protein	1.16071	0.018629
Carub.0002s0500	AT1G60250	BBX26	B-box zinc finger family protein	1.15809	6.214e-07
Carub.0008s1703	AT5G56550	OXS3	oxidative stress 3	1.15696	0.000534864
Carub.0006s2782	AT4G30880	-	Bifunctional inhibitor/lipid-transfer protein/seed storage 2S albumin superfamily protein	1.15509	4.78141e-06
Carub.0007s0399	AT4G36250	ALDH3F1	aldehyde dehydrogenase 3F1	1.15431	2.45918e-35
Carub.0002s1693	AT1G70230	TBL27	TRICHOME BIREFRINGENCE-LIKE 27	1.15222	1.28337e-15
Carub.0007s0269	AT4G37580	HLS1	Acyl-CoA N-acyltransferases (NAT) superfamily protein	1.1514	0.00308214
Carub.0003s2253	AT3G22370	AOX1A	alternative oxidase 1A	1.14912	1.54116e-25
Carub.0005s2726	AT3G60520	-	zinc ion-binding protein	1.14377	4.77796e-14
Carub.0001s1178	AT1G12090	ELP	extensin-like protein	1.13466	3.22875e-36
Carub.0007s2941	AT4G13250	NYC1	NAD(P)-binding Rossmann-fold superfamily protein	1.12428	8.67262e-27
Carub.0008s1473	AT5G54400	-	S-adenosyl-L-methionine-dependent methyltransferases superfamily protein	1.11991	9.51241e-18
Carub.0002s1901	AT1G72200	-	E3 ubiquitin-protein ligase ATL6/9/15/31/42/55 [EC:6.3.2.19] (ATL6S)	1.11564	0.0383953
Carub.0001s1451	AT1G14730	-	Cytochrome b561/ferric reductase transmembrane protein family	1.11271	2.19453e-06
Carub.0007s0419	AT4G36040	J11	Chaperone DnaJ-domain superfamily protein	1.10334	7.15136e-09
Carub.0001s3640	AT1G47610	-	Transducin/WD40 repeat-like superfamily protein	1.10312	0.00014451
Carub.0008s2201	AT5G61340	-	unknown protein	1.10091	3.52987e-07
Carub.0002s0700	AT3G44400	-	Disease resistance protein (TIR-NBS-LRR class) family	1.09951	5.68943e-28
Carub.0006s1112	AT5G12940	-	Leucine-rich repeat (LRR) family protein	1.09877	1.96114e-13
Carub.0008s1513	AT5G54840	SGP1	Ras-related small GTP-binding family protein	1.09688	0.000194516
Carub.0003s1332	AT3G13784	CWINV5	cell wall invertase 5	1.09313	0.000141759
Carub.0007s0107	AT4G39190	-	nucleolar-like protein	1.09106	1.27472e-06
Carub.0001s3855	AT1G49380	-	cytochrome c biogenesis protein (resB, ccs1)	1.08879	9.01781e-21
Carub.0002s0499	AT1G60260	BGLU5	beta glucosidase 5	1.079	3.36639e-14
Carub.0002s2453	AT1G21910	DREB26	Integrase-type DNA-binding superfamily protein	1.07755	0.0161847
Carub.0007s1938	AT4G21960	PRXR1	Peroxidase superfamily protein	1.0771	8.6802e-76
Carub.0003s1434	AT3G14690	CYP72A15	cytochrome P450, family 72, subfamily A, polypeptide 15	1.07497	3.64828e-17
Carub.0003s3427	AT5G54320	-	unknown protein (DUF295); DUF295 DOMAIN-CONTAINING PROTEIN-RELATED	1.07475	0.00714559
Carub.0002s0799	AT1G56220	-	Dormancy/auxin associated family protein	1.06974	1.2563e-15
Carub.0008s1631	AT5G55970	-	RING/U-box superfamily protein	1.06874	0.00324309
Carub.0008s1123	AT5G51190	ERF105	Integrase-type DNA-binding superfamily protein; ethylene response factor 105	1.06646	4.72366e-10
Carub.0001s0234	AT1G03220	-	Eukaryotic aspartyl protease family protein	1.06511	0.0293695
Carub.0007s1052	AT4G30080	ARF16	auxin response factor 16	1.06229	3.2698e-09
Carub.0008s2720	AT5G67300	MYBR1	myb domain protein r1	1.06223	2.75871e-12
Carub.0004s2947	AT2G46760	GulLO6	D-arabinono-1,4-lactone oxidase family protein	1.06196	0.00157252
Carub.0003s2431	AT3G24190	-	Protein kinase superfamily protein	1.06035	3.00268e-63
Carub.0005s1999	AT3G53420	PIP2A	plasma membrane intrinsic protein 2A	1.05902	2.00535e-12
Carub.0002s2719	AT1G80380	-	glycerate 3-kinase; P-loop containing nucleoside triphosphate hydrolases superfamily protein	1.0546	5.86544e-20
Carub.0005s0057	AT2G01620	MEE11	RNI-like superfamily protein	1.05323	6.28104e-15
Carub.0024s0020	AT5G01840	OFP1	ovate family protein 1	1.05257	5.0093e-06
Carub.0001s4035	AT1G51500	ABCG12	ABC-2 type transporter family protein	1.04706	9.68007e-31
Carub.0002s2614	AT1G79270	ECT8	evolutionarily conserved C-terminal region 8	1.04451	2.62275e-22
Carub.0008s2747	AT5G67030	ABA1	zeaxanthin epoxidase (ZEP) (ABA1)	1.03953	1.04441e-11
Carub.0003s2145	AT3G21420	LBO1	2-oxoglutarate (2OG) and Fe(II)-dependent oxygenase superfamily protein	1.03368	2.08189e-15
Carub.0006s0591	AT5G06980	LNK4	night light-inducible and clock-regulated 4	1.03293	0.0348985
Carub.0005s2630	AT3G59580	NLP9	Plant regulator RWP-RK family protein; NIN-like protein 9	1.03277	6.52705e-06
Carub.0001s4055	AT1G51680	4CL1	4-coumarate:CoA ligase 1	1.03181	2.25295e-30
Carub.0003s0887	AT3G09780	CCR1	CRINKLY4 related 1	1.03061	0.0486449
Carub.0002s0325	AT1G61800	GPT2	glucose-6-phosphate/phosphate translocator 2	1.02933	0.0295784
Carub.0003s0605	AT3G06590	AIF2	basic helix-loop-helix (bHLH) DNA-binding superfamily protein; ATBS1 Interacting Factor 2	1.02871	1.20782e-17
Carub.0001s2279	AT1G23205	-	Plant invertase/pectin methylesterase inhibitor superfamily protein	1.02843	5.99069e-10
Carub.0004s1270	AT2G31380	STH	salt tolerance homologue	1.02721	0.0097947
Carub.0001s1545	AT1G15670	-	Galactose oxidase/kelch repeat superfamily protein	1.02044	2.25323e-26
Carub.0001s3893	AT1G49720	ABF1	abscisic acid responsive element-binding factor 1	1.01691	3.65638e-15
Carub.0006s0799	AT5G09440	EXL4	EXORDIUM like 4	1.01447	7.3742e-14
Carub.0003s3279	AT2G18550	HB21	homeobox protein 21	1.01367	3.50607e-05
Carub.0008s2496	AT5G64170	LNK1	dentin sialophosphoprotein-like protein; night light-inducible and clock-regulated 1	1.01164	2.97323e-20
Carub.0001s0626	AT1G06980	-	unknown protein; PADRE domain (PADRE)	1.00963	0.02785
Carub.0001s1578	AT1G15980	PnsB1	NDH-dependent cyclic electron flow 1	1.00853	1.99558e-51
Carub.0001s1954	AT1G20010	TUB5	tubulin beta-5 chain	1.00359	1.67152e-29
Carub.0001s3949	AT1G50420	SCL3	scarecrow-like 3	1.00241	2.14028e-16
Carub.0007s2463	AT4G16750	ERF039	Integrase-type DNA-binding superfamily protein; ETHYLENE-RESPONSIVE TRANSCRIPTION FACTOR ERF039	1.00004	0.000218284

## Sheet: 373 down-regulated targets
Cr.ID	At.ID	Name	Description	log2(Fold Change)	FDR
Carub.0006s2285	AT5G24990	-	enhanced disease resistance-like protein (DUF1336)	-9.20535	2.97748e-09
Carub.0002s1179	AT2G47800	MRP4	multidrug resistance-associated protein 4	-8.62306	9.67082e-58
Carub.0002s1578	AT1G69180	CRC	Plant-specific transcription factor YABBY family protein	-8.58163	0.0299502
Carub.0172s0001	AT5G61690	ABCA11	ABC TRANSPORTER A FAMILY MEMBER 11	-8.13397	2.66303e-07
Carub.0001s4034	AT1G47600	BGLU34	beta glucosidase 34	-7.70515	2.47635e-06
Carub.0006s2314	AT5G25320	ACR2	ACT DOMAIN-CONTAINING PROTEIN ACR2	-7.528	4.26321e-06
Carub.0002s0603	AT1G58725	-	GDSL-like Lipase/Acylhydrolase superfamily protein	-7.17947	1.25966e-05
Carub.0006s2068	AT5G22900	CHX3	cation/H+ exchanger 3	-7.05678	3.6503e-05
Carub.0008s2393	AT5G63170	-	GDSL-like Lipase/Acylhydrolase superfamily protein	-6.6969	7.46511e-05
Carub.0006s0015	AT5G01690	CHX27	cation/H+ exchanger 27	-6.39181	0.000209756
Carub.0004s1662	AT5G32613	-	Zinc knuckle (CCHC-type) family protein	-6.32529	0.000326574
Carub.0001s3805	AT1G48910	YUC10	Flavin-containing monooxygenase family protein	-5.94601	0.00108472
Carub.0007s2703	AT1G67390	-	F-box family protein	-5.93045	2.37221e-07
Carub.0007s1972	AT4G21690	GA3OX3	gibberellin 3-oxidase 3	-5.90761	0.00112077
Carub.0006s1903	AT5G20690	PRK6	Leucine-rich repeat protein kinase family protein	-5.88771	2.63637e-07
Carub.0001s1009	AT1G10620	PERK11	Protein kinase superfamily protein	-5.6195	1.80146e-06
Carub.0001s2130	AT1G34800	-	AAF16529.1-RELATED protein	-5.60693	0.00726284
Carub.0006s2196	AT5G24210	-	alpha/beta-Hydrolases superfamily protein	-5.49146	0.0301582
Carub.0001s0054	AT1G01680	PUB54	plant U-box 54	-5.45016	0.00445186
Carub.0001s3478	AT1G43800	FTM1	FLORAL TRANSITION AT THE MERISTEM1; Plant stearoyl-acyl-carrier-protein desaturase family protein	-5.44463	0.0338758
Carub.0001s1380	AT1G14120	DAO2	Auxin Oxidase; 2-oxoglutarate (2OG) and Fe(II)-dependent oxygenase superfamily protein	-5.44454	0.0378692
Carub.0005s1893	AT3G52320	-	F-box and associated interaction domains-containing protein	-5.2146	0.00762223
Carub.0008s2241	AT5G61720	-	unknown protein (DUF1216)	-5.19222	2.0502e-05
Carub.0007s2097	AT4G20160	-	golgin family A protein	-5.1525	9.96417e-23
Carub.0001s3621	AT1G06970	CHX14	cation/hydrogen exchanger 14	-5.0641	0.0257042
Carub.0001s1627	AT1G16515	-	unknown protein	-5.04147	1.27136e-09
Carub.0004s2957	AT2G46860	PPa3	pyrophosphorylase 3	-4.99042	1.43344e-34
Carub.0002s0815	AT1G55030	-	RNI-like superfamily protein	-4.97495	0.0286055
Carub.0004s0856	AT5G42640	GAL2	C2H2 and C2HC zinc fingers superfamily protein; GAZ-LIKE 2	-4.95449	0.0150769
Carub.0003s3489	AT2G20470	-	AGC (cAMP-dependent, cGMP-dependent and protein kinase C) kinase family protein	-4.93974	0.000119613
Carub.0004s0732	AT2G26850	-	F-box family protein	-4.88975	1.27636e-07
Carub.0003s2976	-	-	unknown protein	-4.87475	0.000478251
Carub.0006s2316	AT5G25340	-	Ubiquitin-like superfamily protein	-4.85163	1.75977e-05
Carub.0004s1381	AT2G32460	MYB101	myb domain protein 101	-4.7709	7.89599e-07
Carub.0003s3168	AT2G17590	-	Cysteine/Histidine-rich C1 domain family protein	-4.72552	0.0238485
Carub.0003s2550	AT3G25165	RALFL25	ralf-like 25	-4.70136	0.000447761
Carub.0003s1947	AT3G19610	-	unknown protein (DUF936)	-4.69958	0.0303604
Carub.0005s2890	AT3G62170	VGDH2	VANGUARD-like protein	-4.68402	2.00203e-05
Carub.0006s2273	AT5G10660	-	chromo domain cec-like protein	-4.66953	2.10804e-20
Carub.0007s1642	AT4G24640	APPB1	Plant invertase/pectin methylesterase inhibitor superfamily protein	-4.65382	6.7703e-05
Carub.0001s0778	AT1G08430	ALMT1	aluminum-activated malate transporter 1	-4.57297	2.60425e-17
Carub.0006s1781	AT5G19473	RIN4	RPM1-interacting protein 4 (RIN4) family protein	-4.56662	0.00848749
Carub.0003s0088	AT3G01270	-	Pectate lyase family protein	-4.55946	0.000160717
Carub.0002s0971	AT1G64740	TUA1	alpha-1 tubulin	-4.54325	0.00118335
Carub.0007s0456	AT4G35720	-	DUF241 domain protein, putative (DUF241)	-4.51833	2.83783e-30
Carub.0007s1303	AT4G27790	-	Calcium-binding EF hand family protein	-4.50944	2.34875e-05
Carub.0001s2255	AT3G52320	-	F-box and associated interaction domains-containing protein	-4.48412	0.0458714
Carub.0005s2895	AT3G62230	DAF1	F-box family protein	-4.48047	1.36793e-05
Carub.0001s3269	AT1G29962	AGL64	AGAMOUS-like 64	-4.47052	0.0482393
Carub.0005s2543	AT3G59210	-	F-box/RNI-like superfamily protein	-4.45027	0.0465509
Carub.0001s3846	AT1G49290	-	unknown protein; GB|AAD43168.1	-4.43411	0.000441547
Carub.0006s0593	AT5G07010	ST2A	hydroxyjasmonate sulfotransferase 2A	-4.41037	0.0148501
Carub.0005s2891	AT3G62180	PMEI	Plant invertase/pectin methylesterase inhibitor superfamily protein	-4.41025	0.00816189
Carub.0001s0491	AT1G05580	CHX23	cation/H+ exchanger 23	-4.3724	0.00072019
Carub.0002s1357	AT1G67290	GLOX1	glyoxal oxidase-related protein	-4.34427	3.27944e-05
Carub.0006s1256	AT5G14380	AGP6	arabinogalactan protein 6	-4.34316	0.00011207
Carub.0004s0305	AT2G23900	-	Pectin lyase-like superfamily protein	-4.33988	0.000290718
Carub.0005s0163	AT2G02720	-	Pectate lyase family protein	-4.32996	0.000132856
Carub.0004s1505	AT2G33420	-	unknown protein (DUF810); F19P19.6 PROTEIN	-4.26088	1.90609e-05
Carub.0007s2287	AT4G18395	None	ubiquitin-protein ligase arkadia-A, putative-related	-4.25062	1.32166e-08
Carub.0006s3127	AT4G12100	CUL4	cullin 4	-4.23413	0.0316059
Carub.0001s0817	AT1G08695	SCRL3	SCR-like 3	-4.23091	0.00134078
Carub.0007s0643	AT5G58230	MSI1	Transducin/WD40 repeat-like superfamily protein	-4.21292	0.000628785
Carub.0003s0210	AT3G02970	EXL6	EXORDIUM like 6	-4.19936	0.000728397
Carub.0004s0380	AT2G24450	FLA3	FASCICLIN-like arabinogalactan protein 3	-4.19336	0.000319372
Carub.0001s0026	AT1G01980	-	FAD-binding Berberine family protein	-4.18932	0.000448554
Carub.0007s3487	AT5G40620	-	unknown protein	-4.18399	0.00237832
Carub.0002s0055	AT1G64235	-	Bifunctional inhibitor/lipid-transfer protein/seed storage helical domain superfamily protein	-4.1322	0.000118008
Carub.0003s3233	AT2G18180	-	Sec14p-like phosphatidylinositol transfer family protein	-4.11845	0.000492547
Carub.0002s2584	AT1G78980	SRF5	STRUBBELIG-receptor family 5	-4.05502	0.000223738
Carub.0002s0973	AT3G01325	-	Expressed protein	-4.05031	5.90231e-06
Carub.0006s2426	AT5G26700	-	RmlC-like cupins superfamily protein	-4.04931	1.69466e-07
Carub.0008s0115	AT5G46770	-	varlmgl domain-containing protein	-3.97766	1.78256e-12
Carub.0008s2400	AT5G63250	-	Carbohydrate-binding X8 domain superfamily protein	-3.9764	6.14231e-05
Carub.0002s2024	AT1G73510	-	unknown protein	-3.92343	0.000182071
Carub.0006s2796	AT4G09465	-	Carbohydrate-binding X8 domain superfamily protein	-3.8982	0.00538829
Carub.0005s0737	AT3G28830	-	unknown protein (DUF1216)	-3.88193	0.0137212
Carub.0004s1558	AT2G33870	RABA1H	RAB GTPase homolog A1H	-3.81118	7.94021e-06
Carub.0004s1542	AT2G33775	RALFL19	ralf-like 19	-3.79934	3.57965e-06
Carub.0002s1606	AT2G02030	-	F-box family protein	-3.78319	8.23179e-06
Carub.0004s1617	AT2G34500	CYP710A1	cytochrome P450, family 710, subfamily A, polypeptide 1	-3.77608	6.83559e-18
Carub.0001s4068	AT1G51790	-	Leucine-rich repeat protein kinase family protein	-3.77474	0.0113154
Carub.0004s0399	AT5G54820	-	F-box/RNI-like superfamily protein	-3.75502	0.0244423
Carub.0003s1680	AT3G17060	-	Pectin lyase-like superfamily protein	-3.70786	3.54362e-24
Carub.0006s1359	AT5G15430	-	Plant calmodulin-binding protein-like protein	-3.65034	0.00395473
Carub.0004s0486	AT2G40450	-	BTB/POZ domain-containing protein	-3.60518	1.27371e-05
Carub.0001s2454	AT1G26480	GRF12	general regulatory factor 12 (GRF12)	-3.59835	2.53069e-08
Carub.0001s2131	AT1G21925	-	Plant thionin family protein	-3.59145	0.0126074
Carub.0004s0485	AT2G40450	-	BTB/POZ domain-containing protein	-3.53523	4.36747e-05
Carub.0008s0660	AT1G17770	SUVH7	histone-lysine N-methyltransferase, H3 lysine-9 specific SUVH3-like protein	-3.50991	0.0149914
Carub.0005s0871	AT3G04110	GLR1.1	glutamate receptor 1.1	-3.4403	0.0181244
Carub.0001s2547	AT1G24620	CML25	CALMODULIN LIKE 25	-3.39554	9.32555e-12
Carub.0005s2177	AT3G55130	ABCG19	ABC transporter white-brown complex homolog 19	-3.33956	1.18096e-25
Carub.0002s0257	AT1G62410	-	MIF4G domain-containing protein; EUKARYOTIC TRANSLATION INITIATION FACTOR ISOFORM 4G-1	-3.33804	0.003931
Carub.0008s1872	AT5G58170	SVL5	SHV3-like 5	-3.33407	1.59345e-12
Carub.0007s1238	AT4G28365	ENODL3	early nodulin-like protein 3	-3.31066	3.95688e-06
Carub.0004s2638	AT2G43840	UGT74F1	UDP-glycosyltransferase 74 F1	-3.26756	7.2803e-16
Carub.0003s2173	AT3G21680	-	unknown protein	-3.25607	9.27605e-05
Carub.0001s1446	AT1G14686	-	ENTH/ANTH/VHS superfamily protein	-3.24811	7.53745e-06
Carub.0005s0733	AT3G28780	-	unknown protein (DUF1216)	-3.20992	0.000422391
Carub.0006s2381	AT5G26050	-	Plant self-incompatibility protein S1 family; S-PROTEIN HOMOLOG 13	-3.20299	0.000136661
Carub.0006s2328	AT5G25430	-	HCO3- transporter family	-3.20273	8.7993e-06
Carub.0004s2317	AT2G40850	PI4K GAMMA 1	phosphoinositide 4-kinase gamma 1	-3.1983	4.33824e-12
Carub.0005s0403	AT3G26120	TEL1	terminal EAR1-like 1	-3.15647	0.0355216
Carub.0007s3587	AT5G39860	PRE1	basic helix-loop-helix (bHLH) DNA-binding family protein	-3.08567	1.18042e-33
Carub.0007s0099	AT4G39110	-	Malectin/receptor-like protein kinase family protein	-3.08238	5.15611e-12
Carub.0003s1898	AT3G19160	IPT8	ATP/ADP isopentenyltransferase	-3.06355	0.00188905
Carub.0003s1062	AT3G11290	-	Myb/SANT-like DNA-binding domain protein	-3.04017	0.0030543
Carub.0001s4408	AT1G55560	sks14	SKU5 similar 14	-3.01969	3.03386e-18
Carub.0172s0002	AT5G61700	ABCA12	ABC TRANSPORTER A FAMILY MEMBER 12	-3.00894	0.000694029
Carub.0001s3447	AT1G43160	RAP2.6	related to AP2 6	-3.00493	0.0108031
Carub.0004s1691	AT1G32640	JIN1	JASMONATE INSENSITIVE 1; Basic helix-loop-helix (bHLH) DNA-binding family protein	-2.9861	0.0239291
Carub.0008s1187	AT5G51845	-	Defensin-like (DEFL) family protein	-2.96738	0.00142743
Carub.0007s0106	AT4G39180	SEC14	Sec14p-like phosphatidylinositol transfer family protein	-2.92825	3.67776e-20
Carub.0001s0395	AT1G04700	-	PB1 domain-containing protein tyrosine kinase	-2.91979	8.52799e-20
Carub.0002s1280	AT1G66620	-	Protein with RING/U-box and TRAF-like domain	-2.91905	0.00369396
Carub.0005s2841	AT3G60980	-	Tetratricopeptide repeat (TPR)-like superfamily protein	-2.89484	1.00985e-15
Carub.0003s1798	AT3G18220	LPP4	LIPID PHOSPHATE PHOSPHATASE 4-RELATED	-2.89121	2.95948e-13
Carub.0008s0074	AT5G47077	LCR6	low-molecular-weight cysteine-rich 6	-2.88992	0.0149328
Carub.0006s1565	AT5G17430	BBM	Integrase-type DNA-binding superfamily protein; BABY BOOM	-2.8822	0.0233698
Carub.0003s1894	AT3G19090	LARP6c	RNA-binding protein	-2.86554	0.0138878
Carub.0007s0593	AT4G34400	-	AP2/B3-like transcriptional factor family protein	-2.812	1.3119e-13
Carub.0001s3195	AT1G33770	-	Protein kinase superfamily protein	-2.77085	6.01511e-08
Carub.0002s2759	AT1G79910	ISTL8	IST1-LIKE 8; Regulator of Vps4 activity in the MVB pathway protein	-2.75106	2.40147e-29
Carub.0006s2374	AT5G25950	-	unknown protein (DUF239)	-2.74536	4.4947e-07
Carub.0001s4330	AT1G54070	-	Dormancy/auxin associated family protein	-2.72805	0.000130927
Carub.0007s2805	AT4G14276	-	Defensin-like (DEFL) family protein	-2.72691	2.45963e-06
Carub.0004s0814	AT1G03220	-	Eukaryotic aspartyl protease family protein	-2.701	1.43135e-63
Carub.0005s1237	AT1G66100	-	THIONIN-2.1-RELATED protein	-2.68108	4.35052e-08
Carub.0004s0118	AT3G47030	-	F-box and associated interaction domains-containing protein	-2.6103	0.00114133
Carub.0001s2308	AT1G23540	PERK12	Protein kinase superfamily protein	-2.60357	1.9275e-10
Carub.0002s2379	AT1G76930	EXT4	extensin 4	-2.56058	0.00757335
Carub.0007s0442	AT4G35810	-	2-oxoglutarate (2OG) and Fe(II)-dependent oxygenase superfamily protein	-2.54575	0.000345429
Carub.0006s2431	AT5G26650	AGL36	AGAMOUS-like 36	-2.50374	0.0468631
Carub.0001s1750	AT1G17770	SUVH7	histone-lysine N-methyltransferase, H3 lysine-9 specific SUVH3-like protein	-2.47389	3.3158e-05
Carub.0007s1719	AT1G04645	-	Plant self-incompatibility protein S1 family	-2.4083	0.000133161
Carub.0008s0030	AT5G47470	UMAMIT7	Nodulin MtN21 /EamA-like transporter family protein	-2.39913	3.9182e-05
Carub.0005s0921	AT3G43990	-	Bromo-adjacent homology (BAH) domain-containing protein	-2.39042	0.00153627
Carub.0001s2828	AT1G30050	MadA3	HEAT-INDUCIBLE TRANSCRIPTION REPRESSOR-RELATED protein	-2.37808	0.000770391
Carub.0001s4069	AT1G51800	IOS1	Leucine-rich repeat protein kinase family protein	-2.37167	0.00970409
Carub.0004s0162	AT2G22460	-	MIZU-KUSSEI-like protein (Protein of unknown function, DUF617)	-2.36826	0.000817368
Carub.0006s1742	AT5G05420	-	FKBP-like peptidyl-prolyl cis-trans isomerase family protein	-2.34241	0.00244889
Carub.0005s2376	AT3G57010	-	Calcium-dependent phosphotriesterase superfamily protein	-2.33471	5.09697e-06
Carub.0003s3395	AT2G19660	-	Cysteine/Histidine-rich C1 domain family protein	-2.29266	0.0468485
Carub.0006s1897	AT5G20635	AGG3	guanine nucleotide-binding protein subunit gamma	-2.28021	7.71256e-37
Carub.0258s0001	AT3G06120	MUTE	basic helix-loop-helix (bHLH) DNA-binding superfamily protein	-2.27621	4.15207e-15
Carub.0002s1127	AT1G65500	-	unknown protein	-2.26014	0.0335566
Carub.0007s2350	AT4G17860	-	unknown protein (DUF239)	-2.25096	0.0146913
Carub.0005s2662	AT3G59880	-	unknown protein	-2.23639	4.35682e-07
Carub.0004s2356	AT2G41240	BHLH100	basic helix-loop-helix protein 100	-2.22337	0.000119634
Carub.0003s1731	AT3G17600	IAA31	indole-3-acetic acid inducible 31	-2.22281	0.0356166
Carub.0006s1329	AT5G15120	PCO1	plant cysteine oxidase 1	-2.22093	1.11013e-22
Carub.0008s2766	AT5G66820	-	transmembrane protein 131 homolog	-2.18541	0.00411069
Carub.0008s2348	AT5G62750	-	unknown protein	-2.1645	0.0448513
Carub.0002s0684	AT1G57750	MAH1	MID-CHAIN ALKANE HYDROXYLASE 1	-2.15727	1.97827e-271
Carub.0008s0027	AT5G47500	PME5	Pectin lyase-like superfamily protein	-2.14636	1.4303e-69
Carub.0001s4237	AT1G53180	-	unknown protein	-2.14528	0.00182713
Carub.0008s0895	AT5G49150	GEX2	gamete expressed 2	-2.12182	0.0386385
Carub.0004s1455	AT2G33100	CSLD1	cellulose synthase-like D1	-2.11527	2.97309e-31
Carub.0004s1773	AT3G52490	SMXL3	SMAX1-like 3; Double Clp-N motif-containing P-loop nucleoside triphosphate hydrolases superfamily protein	-2.10514	8.39376e-05
Carub.0001s0383	AT1G04600	XIA	myosin XI A	-2.10121	2.27245e-20
Carub.0005s0691	AT3G28420	-	Putative membrane lipoprotein; DUF4408 DOMAIN-CONTAINING PROTEIN	-2.08371	2.6823e-06
Carub.0003s3417	AT2G19910	-	RNA-dependent RNA polymerase family protein	-2.07629	1.97399e-75
Carub.0004s3046	AT2G47750	GH3.9	putative indole-3-acetic acid-amido synthetase GH3.9	-2.06456	0.000139335
Carub.0004s1639	AT2G34700	-	Pollen Ole e 1 allergen and extensin family protein	-2.05705	1.37481e-11
Carub.0006s1793	AT5G19580	-	glyoxal oxidase-related protein	-2.0467	9.01704e-39
Carub.0008s0194	AT5G45980	WOX8	WUSCHEL related homeobox 8	-2.03693	0.0297273
Carub.0002s0188	AT1G63100	-	GRAS family transcription factor	-2.02498	2.602e-54
Carub.0006s1203	AT5G13840	FZR3	FIZZY-related 3	-2.01929	7.07373e-107
Carub.0001s3164	AT1G33440	NPF4.4	Major facilitator superfamily protein; NRT1/ PTR family 4.4	-2.01059	0.00305684
Carub.0002s1041	AT1G22590	AGL87	AGAMOUS-like 87	-1.97963	0.00102893
Carub.0007s0571	AT4G34580	COW1	Sec14p-like phosphatidylinositol transfer family protein	-1.97953	0.0245622
Carub.0007s2140	AT4G19810	ChiC	Glycosyl hydrolase family protein with chitinase insertion domain-containing protein	-1.97797	0.0242757
Carub.0007s1773	AT4G23520	-	Cysteine proteinases superfamily protein	-1.97386	0.00262188
Carub.0005s2476	AT3G57920	SPL15	squamosa promoter binding protein-like 15	-1.95291	1.20782e-33
Carub.0001s0571	AT1G06360	-	Fatty acid desaturase family protein	-1.95164	4.37113e-48
Carub.0008s2113	AT5G60440	AGL62	AGAMOUS-like 62	-1.94697	3.87067e-07
Carub.0004s0453	AT2G31470	DOR	F-box and associated interaction domains-containing protein	-1.93573	0.00313688
Carub.0005s1535	AT3G49120	PRXCB	peroxidase CB	-1.92036	2.54103e-06
Carub.0006s3550	AT4G01700	-	Chitinase family protein	-1.90973	1.48073e-08
Carub.0005s1367	AT3G47090	-	Leucine-rich repeat protein kinase family protein	-1.90723	0.0155762
Carub.0006s0044	AT5G01380	-	TRIHELIX TRANSCRIPTION FACTOR GT-3A; Homeodomain-like superfamily protein	-1.89262	8.91428e-08
Carub.0002s2399	AT1G77110	PIN6	Auxin efflux carrier family protein	-1.88307	1.21153e-05
Carub.0007s0471	AT4G35590	RKD5	RWP-RK domain-containing protein	-1.88292	4.50417e-09
Carub.0002s1122	AT1G65481	-	unknown protein	-1.88053	0.0247809
Carub.0008s0085	AT1G07540	TRFL2	TRF-like 2	-1.83981	4.83565e-20
Carub.0008s2705	AT5G67420	LBD37	LOB domain-containing protein 37	-1.8385	0.0270582
Carub.0003s0914	AT3G10040	-	sequence-specific DNA binding transcription factor	-1.82666	2.05978e-13
Carub.0008s2656	AT5G65690	PCK2	phosphoenolpyruvate carboxykinase 2	-1.82035	0.00103946
Carub.0007s0512	AT4G35180	LHT7	LYS/HIS transporter 7	-1.81552	2.05208e-35
Carub.0007s0750	AT4G32980	ATH1	homeobox protein ATH1	-1.81507	6.93302e-42
Carub.0006s3374	AT4G03330	SYP123	syntaxin of plants 123	-1.80802	5.77293e-07
Carub.0007s0845	AT4G32105	-	Beta-1,3-N-Acetylglucosaminyltransferase family protein	-1.79498	0.0136174
Carub.0008s1662	AT5G56300	GAMT2	gibberellic acid methyltransferase 2	-1.79188	0.000702166
Carub.0007s1421	AT4G26660	-	kinesin-like protein	-1.78968	4.81472e-66
Carub.0001s0412	AT1G04880	HMGBD15	HMG (high mobility group) box protein with ARID/BRIGHT DNA-binding domain-containing protein	-1.76975	6.03503e-09
Carub.0003s1184	AT3G12510	-	MADS-box family protein	-1.76908	0.0123235
Carub.0006s3023	AT4G11330	MPK5	MITOGEN-ACTIVATED PROTEIN KINASE 5	-1.76162	1.65109e-43
Carub.0007s1958	AT4G21820	ASPM	abnormal spindle-like microcephaly-associated protein (ASPM, ASP)	-1.75941	1.99194e-97
Carub.0001s0288	AT1G03780	TPX2	targeting protein for XKLP2	-1.75673	1.38286e-40
Carub.0005s2055	AT3G53960	NPF5.7	Major facilitator superfamily protein; PROTEIN NRT1_ PTR FAMILY 5.7	-1.75248	0.0272354
Carub.0001s4195	AT1G65440	GTB1	global transcription factor group B1	-1.75246	1.71212e-05
Carub.0004s0247	AT2G23260	UGT84B1	UDP-glucosyl transferase 84B1	-1.75154	0.0186868
Carub.0006s2292	AT5G25090	ENODL13	early nodulin-like protein 13	-1.7484	1.40977e-130
Carub.0004s0570	AT2G25880	AUR2	ataurora2	-1.744	3.86634e-64
Carub.0008s2257	AT5G61890	-	ETHYLENE-RESPONSIVE TRANSCRIPTION FACTOR ERF114	-1.74293	0.00677447
Carub.0005s1536	AT3G49120	PRXCB	peroxidase CB	-1.73594	0.00103176
Carub.0003s0378	AT3G04620	DAN1	Alba DNA/RNA-binding protein	-1.73152	2.96049e-06
Carub.0002s1499	AT1G68480	JAG	ZINC FINGER PROTEIN JAGGED	-1.72773	1.0308e-07
Carub.0007s3583	AT5G39890	-	2-aminoethanethiol dioxygenase, putative (DUF1637)	-1.72617	0.00325096
Carub.0001s1366	AT1G13970	-	unknown protein (DUF1336)	-1.72034	1.79256e-22
Carub.0002s2633	AT1G79470	-	Aldolase-type TIM barrel family protein	-1.71913	2.2309e-31
Carub.0001s0792	AT1G08560	SYP111	syntaxin of plants 111	-1.7129	8.13833e-81
Carub.0008s1587	AT5G55520	-	kinesin-like protein	-1.69643	1.30017e-34
Carub.0007s2086	AT4G20320	-	CTP synthase family protein	-1.68347	2.25354e-25
Carub.0003s0553	AT3G06090	-	unknown protein	-1.68328	0.0122579
Carub.0006s0905	AT5G10570	-	basic helix-loop-helix (bHLH) DNA-binding superfamily protein	-1.6759	0.00275589
Carub.0006s2163	AT5G23910	-	ATP binding microtubule motor family protein	-1.66668	2.18543e-80
Carub.0001s2900	AT1G30710	BBE9	FAD-binding Berberine family protein	-1.66361	0.0043249
Carub.0004s0959	AT2G28620	RSW7	RADIALLY SWOLLEN 7; P-loop containing nucleoside triphosphate hydrolases superfamily protein	-1.66285	8.64817e-39
Carub.0003s1954	AT1G70895	CLE17	CLAVATA3/ESR-RELATED 17	-1.66279	4.77385e-06
Carub.0005s2658	AT3G59850	-	Pectin lyase-like superfamily protein	-1.6624	7.64174e-36
Carub.0001s0146	AT1G06810	-	endonuclease/glycosyl hydrolase	-1.66094	2.22377e-07
Carub.0005s2242	AT3G55660	ROPGEF6	ROP (rho of plants) guanine nucleotide exchange factor 6	-1.65302	1.82747e-53
Carub.0008s2333	AT5G62660	-	F-box and associated interaction domains-containing protein	-1.63849	5.53321e-05
Carub.0003s1315	AT5G49040	-	Disease resistance-responsive (dirigent-like protein) family protein	-1.62798	0.000464846
Carub.0002s2010	AT1G73360	HDG11	homeodomain GLABROUS 11	-1.62411	1.47436e-23
Carub.0006s2358	AT5G25810	tny	ETHYLENE-RESPONSIVE TRANSCRIPTION FACTOR TINY	-1.61669	0.00699342
Carub.0007s2920	AT4G13370	-	unknown protein (DUF936)	-1.60434	3.54059e-73
Carub.0008s0610	AT5G42800	DFR	dihydroflavonol 4-reductase	-1.59707	8.24653e-07
Carub.0004s0275	AT2G23530	-	Zinc-finger domain of monoamine-oxidase A repressor R1	-1.59479	1.1241e-62
Carub.0007s3478	AT5G40700	-	TPX2 DOMAIN-CONTAINING PROTEIN	-1.58737	1.59689e-27
Carub.0006s2996	AT4G11140	CRF1	cytokinin response factor 1	-1.5868	0.0136477
Carub.0015s0021	AT3G44590	-	60S acidic ribosomal protein family protein P2-4	-1.57314	9.55193e-24
Carub.0001s4230	AT1G53140	DRP5A	Dynamin related protein 5A	-1.57288	2.10923e-41
Carub.0008s1644	AT5G56120	-	unknown protein	-1.56294	2.20689e-64
Carub.0003s1183	AT3G12500	HCHIB	basic chitinase	-1.56138	0.0440107
Carub.0003s2006	AT3G20150	-	Kinesin motor family protein 15 (KIF15)	-1.56068	7.15679e-59
Carub.0003s0166	AT3G02550	LBD41	LOB domain-containing protein 41	-1.55933	7.50424e-24
Carub.0006s2447	AT5G26810	-	Pectin lyase-like superfamily protein	-1.55639	2.67628e-16
Carub.0004s0387	AT4G08990	DNMT1	DNA (cytosine-5-)-methyltransferase family protein (DNMT1, dcm)	-1.55169	0.000153891
Carub.0006s0863	AT5G10170	MIPS3	myo-inositol-1-phosphate synthase 3	-1.54675	2.7769e-106
Carub.0004s1854	AT2G36710	-	Pectin lyase-like superfamily protein	-1.54026	1.41085e-05
Carub.0004s0176	AT2G22610	-	Di-glucose binding protein with Kinesin motor domain-containing protein	-1.53927	2.80102e-39
Carub.0006s1444	AT5G16250	-	unknown protein	-1.51615	4.89581e-50
Carub.0007s2417	AT4G17240	-	unknown protein	-1.51337	2.20188e-21
Carub.0001s3956	AT1G50490	UBC20	ubiquitin-conjugating enzyme 20	-1.50673	3.21084e-63
Carub.0005s1307	AT3G46840	-	SUBTILISIN-LIKE PROTEASE SBT4.4-RELATED protein	-1.50592	7.70838e-15
Carub.0001s0183	AT1G02730	CSLD5	cellulose synthase-like D5	-1.50366	3.08372e-79
Carub.0002s2183	AT1G75040	PR5	pathosis-related protein 5	-1.50148	6.69732e-06
Carub.0004s2381	AT2G41510	CKX1	cytokinin oxidase/dehydrogenase 1	-1.49938	0.000783204
Carub.0007s0766	AT4G32830	AUR1	ataurora1	-1.4944	6.93923e-56
Carub.0004s0894	AT2G28140	-	enabled-like protein (DUF1635)	-1.49175	1.10712e-08
Carub.0006s2857	AT4G10020	HSD5	hydroxysteroid dehydrogenase 5	-1.49151	0.0251297
Carub.0005s2594	AT3G59220	PRN	pirin	-1.49043	2.85865e-18
Carub.0005s0391	AT3G26050	-	TPX2 (targeting protein for Xklp2) protein family	-1.48831	1.36594e-48
Carub.0007s1782	AT4G23340	-	2-oxoglutarate (2OG) and Fe(II)-dependent oxygenase superfamily protein	-1.4701	0.0111065
Carub.0002s2466	AT1G77760	NIA1	nitrate reductase 1	-1.46915	0.0438082
Carub.0008s1832	AT5G57800	CER3	VERY-LONG-CHAIN ALDEHYDE DECARBONYLASE	-1.46768	5.97698e-53
Carub.0005s0383	AT3G25980	MAD2	DNA-binding HORMA family protein	-1.46243	3.62465e-33
Carub.0004s2937	AT2G46660	CYP78A6	cytochrome P450, family 78, subfamily A, polypeptide 6	-1.46149	3.8263e-09
Carub.0001s3908	AT1G49870	-	unknown protein	-1.4482	1.91273e-17
Carub.0007s3377	-	-	-	-1.44201	6.49222e-14
Carub.0002s2713	AT1G80450	-	VQ motif-containing protein 11	-1.43574	8.08566e-07
Carub.0004s1519	AT2G33560	BUBR1	BUB1-related (BUB1: budding uninhibited by benzymidazol 1)	-1.43133	1.80173e-21
Carub.0006s0071	AT5G01180	PTR5	peptide transporter 5	-1.42848	0.000312378
Carub.0001s1770	AT1G76690	OPR2	12-oxophytodienoate reductase 2	-1.42356	2.82086e-11
Carub.0003s1707	AT3G17360	POK1	phragmoplast orienting kinesin 1	-1.41462	6.82527e-77
Carub.0008s2743	AT5G67080	MAPK19	mitogen-activated protein kinase 19	-1.41159	0.00559301
Carub.0007s2809	AT4G14250	-	structural constituent of ribosome protein	-1.40135	0.0473814
Carub.0005s1274	AT5G38300	-	DUF4005 DOMAIN-CONTAINING PROTEIN	-1.37837	2.43141e-20
Carub.0005s1760	AT3G51230	-	chalcone-flavanone isomerase family protein	-1.37041	8.96532e-21
Carub.0006s2960	AT4G10850	SWEET7	Nodulin MtN3 family protein	-1.37033	0.00542897
Carub.0007s1535	AT4G25630	FIB2	fibrillarin 2	-1.36999	3.96592e-09
Carub.0001s1934	AT1G19830	SAUR54	SMALL AUXIN UPREGULATED RNA 54	-1.36748	0.00351106
Carub.0001s0848	AT1G09170	-	P-loop nucleoside triphosphate hydrolases superfamily protein with CH (Calponin Homology) domain-containing protein	-1.36167	0.0161775
Carub.0003s0122	AT3G02110	scpl25	serine carboxypeptidase-like 25	-1.35811	5.27703e-14
Carub.0001s4095	AT1G52030	MBP2	myrosinase-binding protein 2	-1.35134	9.71002e-07
Carub.0006s2349	AT5G25620	YUC6	Flavin-binding monooxygenase family protein	-1.34843	8.24772e-10
Carub.0007s1587	AT4G25160	-	U-box domain-containing protein kinase family protein	-1.33839	2.87355e-12
Carub.0007s1840	AT4G22880	LDOX	leucoanthocyanidin dioxygenase	-1.33677	1.2649e-20
Carub.0001s0591	AT1G06540	-	unknown protein	-1.33274	0.00422113
Carub.0001s1262	AT1G12860	SCRM2	basic helix-loop-helix (bHLH) DNA-binding superfamily protein	-1.33218	2.4596e-26
Carub.0007s3458	AT5G40910	-	Disease resistance protein (TIR-NBS-LRR class) family	-1.32947	0.0272132
Carub.0001s0260	AT1G03470	NET3A	Kinase interacting (KIP1-like) family protein	-1.32273	1.2283e-32
Carub.0006s0482	AT5G05940	ROPGEF5	ROP guanine nucleotide exchange factor 5	-1.30641	1.51903e-33
Carub.0007s0951	AT4G31000	-	Calmodulin-binding protein	-1.30589	7.58509e-06
Carub.0008s0979	AT5G49920	-	Octicosapeptide/Phox/Bem1p family protein	-1.30541	5.17369e-10
Carub.0006s1523	AT5G17050	UGT78D2	UDP-glucosyl transferase 78D2	-1.3045	7.28083e-44
Carub.0002s2702	AT1G80540	-	envelope glycoprotein B	-1.30327	1.54309e-07
Carub.0007s1344	AT3G53700	MEE40	Pentatricopeptide repeat (PPR) superfamily protein	-1.30088	2.38163e-08
Carub.0008s2031	AT5G59670	-	Leucine-rich repeat protein kinase family protein	-1.29953	4.35261e-07
Carub.0001s0477	AT1G05440	-	C-8 sterol isomerase; igma non-opioid intracellular receptor 1	-1.2857	1.47628e-14
Carub.0001s3941	AT1G50310	STP9	sugar transporter 9	-1.2832	0.00221184
Carub.0002s2241	AT1G75550	-	glycine-rich protein	-1.27742	0.000939543
Carub.0007s2030	AT4G21120	AAT1	amino acid transporter 1	-1.27518	7.27109e-18
Carub.0004s0088	AT2G21850	-	Cysteine/Histidine-rich C1 domain family protein	-1.27324	4.59174e-07
Carub.0005s0744	AT3G28900	-	Ribosomal protein L34e superfamily protein	-1.26922	1.02976e-16
Carub.0007s0251	AT4G37740	GRF2	growth-regulating factor 2	-1.26077	1.67121e-12
Carub.0003s2094	AT3G20980	-	Gag-Pol-related retrotransposon family protein	-1.24633	0.00394215
Carub.0002s1077	AT1G65240	A39	ASPARTIC PROTEINASE 39; Eukaryotic aspartyl protease family protein	-1.2369	8.22878e-05
Carub.0007s1800	AT4G23210	CRK13	cysteine-rich RLK (RECEPTOR-like protein kinase) 13	-1.23494	0.0473524
Carub.0007s0248	AT4G37770	ACS8	1-amino-cyclopropane-1-carboxylate synthase 8	-1.2338	0.00859612
Carub.0001s0599	AT1G06660	JASON	aspartyl/glutamyl-tRNA(Asn/Gln) amidotransferase subunit	-1.21506	8.17017e-30
Carub.0001s1070	AT1G11125	-	unknown protein	-1.21359	5.66649e-06
Carub.0004s1807	AT3G52770	ZPR3	protein LITTLE ZIPPER 3	-1.21264	0.00776271
Carub.0001s3262	AT1G34580	-	Major facilitator superfamily protein; SUGAR TRANSPORT PROTEIN 5	-1.19536	9.12249e-06
Carub.0001s1022	AT1G10710	PHS1	poor homologous synapsis 1	-1.19211	3.31637e-09
Carub.0003s2410	AT3G23800	SBP3	selenium-binding protein 3	-1.19012	0.0462805
Carub.0001s4094	AT1G52040	MBP2	myrosinase-binding protein 2	-1.1857	1.14244e-54
Carub.0007s3508	AT1G07747	-	Bifunctional inhibitor/lipid-transfer protein/seed storage 2S albumin superfamily protein	-1.17866	0.0411387
Carub.0007s0017	AT4G38230	CPK26	calcium-dependent protein kinase 26	-1.17803	2.04464e-05
Carub.0001s1407	AT1G14370	APK2A	protein kinase 2A	-1.17491	0.0480077
Carub.0002s1501	AT1G68500	-	unknown protein	-1.17074	0.0148549
Carub.0007s1832	AT4G22950	AGL19	AGAMOUS-like 19	-1.16854	0.0064797
Carub.0003s1492	AT3G15270	SPL5	squamosa promoter binding protein-like 5	-1.16511	8.53125e-44
Carub.0007s3599	AT5G39760	HB23	homeobox protein 23	-1.16468	6.39707e-14
Carub.0002s1902	AT1G72210	bHLH96	basic helix-loop-helix (bHLH) DNA-binding superfamily protein	-1.1618	7.91212e-13
Carub.0001s0400	AT1G04760	VAMP726	vesicle-associated membrane protein 726	-1.15975	2.04136e-20
Carub.0008s0132	AT5G46590	NAC096	NAC domain containing protein 96	-1.15563	4.04022e-05
Carub.0007s1841	AT4G22860	-	Cell cycle regulated microtubule associated protein	-1.1548	3.75663e-51
Carub.0007s3129	AT5G35550	MYB123	MYB DOMAIN PROTEIN 123	-1.14681	0.0383419
Carub.0005s2065	AT3G54060	-	unknown protein	-1.14508	0.00745004
Carub.0006s1079	AT5G12270	-	2-oxoglutarate (2OG) and Fe(II)-dependent oxygenase superfamily protein	-1.1316	0.000133628
Carub.0007s2821	AT4G14180	PRD1	putative recombination initiation defect 1	-1.11626	0.0409182
Carub.0003s3292	AT2G18660	PNP-A	plant natriuretic peptide A	-1.11017	0.0351466
Carub.0003s3032	AT2G16570	ASE1	GLN phosphoribosyl pyrophosphate amidotransferase 1	-1.10683	5.94916e-09
Carub.0006s1354	AT5G15350	ENODL17	early nodulin-like protein 17	-1.10581	7.24118e-47
Carub.0001s3926	AT1G50110	BCAT6	branched-chain aminotransferase 6; D-aminoacid aminotransferase-like PLP-dependent enzymes superfamily protein	-1.09874	1.72588e-06
Carub.0001s1166	AT1G11960	-	ERD (early-responsive to dehydration stress) family protein	-1.0986	0.0196023
Carub.0008s2032	AT5G59680	-	Leucine-rich repeat protein kinase family protein	-1.09367	0.000848146
Carub.0004s1779	AT2G36050	OFP15	ovate family protein 15	-1.09213	8.61068e-06
Carub.0001s3516	AT1G44350	ILL6	IAA-amino acid hydrolase ILR1-like 6	-1.08886	0.0309715
Carub.0001s2042	AT1G20950	-	Phosphofructokinase family protein	-1.08747	1.64313e-47
Carub.0004s1060	AT2G29550	TUB7	tubulin beta-7 chain	-1.08416	1.3373e-36
Carub.0002s0351	AT5G54100	SLP2	SPFH/Band 7/PHB domain-containing membrane-associated protein family; stomatin-like protein 2	-1.08049	0.00258627
Carub.0004s0948	AT2G28510	-	Dof-type zinc finger DNA-binding family protein	-1.07951	1.79004e-09
Carub.0008s0463	AT5G43935	FLS6	flavonol synthase 6	-1.07872	1.05455e-43
Carub.0004s1294	AT3G47090	-	Leucine-rich repeat protein kinase family protein	-1.07776	7.10924e-07
Carub.0004s2282	AT2G40590	-	Ribosomal protein S26e family protein	-1.07115	1.86313e-54
Carub.0001s1033	AT1G10780	-	F-box/RNI-like superfamily protein	-1.06612	1.58693e-09
Carub.0006s1606	AT5G17830	-	Choline transporter-like protein; Plasma-membrane choline transporter family protein	-1.06435	3.17376e-05
Carub.0008s2344	AT5G62710	-	Leucine-rich repeat protein kinase family protein	-1.06363	2.1912e-56
Carub.0001s4139	AT1G52400	BGLU18	beta glucosidase 18	-1.06235	1.58059e-41
Carub.0008s0238	AT5G45630	-	senescence regulator (Protein of unknown function, DUF584)	-1.06135	0.0187108
Carub.0006s3265	AT4G04750	-	Major facilitator superfamily protein	-1.06077	1.16662e-58
Carub.0001s0855	AT1G09210	CRT1b	calreticulin 1b	-1.0582	5.60756e-17
Carub.0005s1152	AT3G45680	NPF2.3	Major facilitator superfamily protein; PROTEIN NRT1_ PTR FAMILY 2.1-RELATED	-1.05772	0.014695
Carub.0005s0318	AT2G04030	HSP90B	HEAT SHOCK PROTEIN 90B; Chaperone protein htpG family protein	-1.05555	2.86846e-65
Carub.0004s2342	AT2G27030	CAM5	calmodulin 5	-1.05493	0.000173053
Carub.0006s2346	AT5G25590	-	DNA ligase (DUF632)	-1.05476	4.33258e-21
Carub.0003s1735	AT3G17640	-	Leucine-rich repeat (LRR) family protein	-1.05445	5.59362e-07
Carub.0001s3502	AT1G44110	CYCA1;1	Cyclin A1;1	-1.04778	8.13866e-60
Carub.0002s1201	AT5G39550	VIM3	Zinc finger (C3HC4-type RING finger) family protein	-1.04578	1.06722e-12
Carub.0005s0193	AT2G03090	EXPA15	expansin A15	-1.04547	0.000525515
Carub.0003s3516	AT2G20635	-	mitotic checkpoint serine/threonine-protein kinase BUB1 BETA	-1.04489	4.75241e-33
Carub.0001s1167	AT1G11990	-	O-fucosyltransferase family protein	-1.04183	6.63307e-07
Carub.0001s1179	AT1G12100	-	Bifunctional inhibitor/lipid-transfer protein/seed storage 2S albumin superfamily protein	-1.04159	2.3305e-06
Carub.0001s4336	AT1G54120	-	unknown protein	-1.03592	0.000882036
Carub.0004s2528	AT2G42840	PDF1	protodermal factor 1	-1.03374	7.16929e-26
Carub.0004s0315	AT2G23990	ENODL11	early nodulin-like protein 11	-1.03084	0.0032124
Carub.0004s0008	AT2G21050	LAX2	like AUXIN RESISTANT 2	-1.02984	2.63182e-25
Carub.0001s0193	AT1G02820	LEA3	Late embryosis abundant 3 (LEA3) family protein	-1.02564	0.000155601
Carub.0003s1384	AT3G14290	PAE2	20S proteasome alpha subunit E2	-1.02273	0.0259918
Carub.0003s3019	AT2G16430	PAP10	purple acid phosphatase 10	-1.02109	2.42713e-10
Carub.0001s2554	AT1G24570	-	unknown protein (DUF707)	-1.01855	9.18487e-07
Carub.0001s4186	AT1G52770	-	Phototropic-responsive NPH3 family protein	-1.01784	0.000759335
Carub.0008s0041	AT5G47370	HAT2	Homeobox-leucine zipper protein 4 (HB-4) / HD-ZIP protein	-1.01046	2.50639e-15
Carub.0001s1450	AT1G14720	XTH28	xyloglucan endotransglucosylase/hydrolase 28	-1.00902	1.89036e-37
Carub.0001s1039	AT1G10850	-	Leucine-rich repeat protein kinase family protein	-1.00772	6.96314e-30
Carub.0003s2567	AT3G25260	NPF4.1	Major facilitator superfamily protein; NRT1/ PTR family 4.1	-1.00421	5.76326e-05
Carub.0003s2373	AT3G23530	-	Cyclopropane-fatty-acyl-phospholipid synthase	-1.00318	3.47034e-22
Carub.0004s2004	AT2G38070	-	Protein of unknown function (DUF740)	-1.00009	8.09428e-15

## Sheet: 138 direct targets
Cr.ID	At.ID	Name	Description	log2(Fold Change)	FDR
Carub.0007s1535	AT4G25630	FIB2	fibrillarin 2	-9.20535	2.97748e-09
Carub.0004s1662	AT5G32613	-	Zinc knuckle (CCHC-type) family protein	-8.58163	0.0299502
Carub.0006s2358	AT5G25810	TNY	ETHYLENE-RESPONSIVE TRANSCRIPTION FACTOR TINY	-6.6969	7.46511e-05
Carub.0008s2766	AT5G66820	-	transmembrane protein 131 homolog	-6.32529	0.000326574
Carub.0007s1840	AT4G22880	LDOX	leucoanthocyanidin dioxygenase	-5.90761	0.00112077
Carub.0002s2713	AT1G80450	-	VQ motif-containing protein 11	-5.44463	0.0338758
Carub.0004s2342	AT2G27030	CAM5	calmodulin 5	-5.2146	0.00762223
Carub.0001s4068	AT1G51790	-	Leucine-rich repeat protein kinase family protein	-5.04147	1.27136e-09
Carub.0007s3583	AT5G39890	-	2-aminoethanethiol dioxygenase, putative (DUF1637)	-4.93974	0.000119613
Carub.0002s2379	AT1G76930	EXT4	extensin 4	-4.66953	2.10804e-20
Carub.0001s3516	AT1G44350	ILL6	IAA-amino acid hydrolase ILR1-like 6	-4.51833	2.83783e-30
Carub.0001s0855	AT1G09210	CRT1b	calreticulin 1b	-4.41037	0.0148501
Carub.0003s0378	AT3G04620	DAN1	Alba DNA/RNA-binding protein	-4.34316	0.00011207
Carub.0001s4094	AT1G52040	MBP2	myrosinase-binding protein 2	-4.25062	1.32166e-08
Carub.0003s3417	AT2G19910	-	RNA-dependent RNA polymerase family protein	-4.1322	0.000118008
Carub.0008s2656	AT5G65690	PCK2	phosphoenolpyruvate carboxykinase 2	-3.97766	1.78256e-12
Carub.0004s2282	AT2G40590	-	Ribosomal protein S26e family protein	-3.92343	0.000182071
Carub.0008s2393	AT5G63170	-	GDSL-like Lipase/Acylhydrolase superfamily protein	-3.81118	7.94021e-06
Carub.0003s1680	AT3G17060	-	Pectin lyase-like superfamily protein	-3.77474	0.0113154
Carub.0006s2346	AT5G25590	-	DNA ligase (DUF632)	-3.70786	3.54362e-24
Carub.0004s0315	AT2G23990	ENODL11	early nodulin-like protein 11	-3.65034	0.00395473
Carub.0002s1501	AT1G68500	-	unknown protein	-3.59835	2.53069e-08
Carub.0002s1122	AT1G65481	-	unknown protein	-3.59145	0.0126074
Carub.0007s1587	AT4G25160	-	U-box domain-containing protein kinase family protein	-3.25607	9.27605e-05
Carub.0002s2466	AT1G77760	NIA1	nitrate reductase 1	-3.08567	1.18042e-33
Carub.0007s2287	AT4G18395	-	ubiquitin-protein ligase arkadia-A	-2.9861	0.0239291
Carub.0003s3292	AT2G18660	PNP-A	plant natriuretic peptide A	-2.96738	0.00142743
Carub.0007s0593	AT4G34400	-	AP2/B3-like transcriptional factor family protein	-2.89121	2.95948e-13
Carub.0002s2759	AT1G79910	ISTL8	IST1-LIKE 8; Regulator of Vps4 activity in the MVB pathway protein	-2.812	1.3119e-13
Carub.0006s0905	AT5G10570	-	basic helix-loop-helix (bHLH) DNA-binding superfamily protein	-2.75106	2.40147e-29
Carub.0008s2031	AT5G59670	-	Leucine-rich repeat protein kinase family protein	-2.701	1.43135e-63
Carub.0005s1893	AT3G52320	-	F-box and associated interaction domains-containing protein	-2.56058	0.00757335
Carub.0005s0193	AT2G03090	EXPA15	expansin A15	-2.28021	7.71256e-37
Carub.0008s1832	AT5G57800	CER3	VERY-LONG-CHAIN ALDEHYDE DECARBONYLASE	-2.23639	4.35682e-07
Carub.0006s3265	AT4G04750	-	Major facilitator superfamily protein	-2.22281	0.0356166
Carub.0008s0610	AT5G42800	DFR	dihydroflavonol 4-reductase	-2.22093	1.11013e-22
Carub.0004s1807	AT3G52770	ZPR3	protein LITTLE ZIPPER 3	-2.18541	0.00411069
Carub.0003s3516	AT2G20635	-	mitotic checkpoint serine/threonine-protein kinase BUB1 BETA	-2.15727	1.97827e-271
Carub.0001s1770	AT1G76690	OPR2	12-oxophytodienoate reductase 2	-2.14636	1.4303e-69
Carub.0008s2344	AT5G62710	-	Leucine-rich repeat protein kinase family protein	-2.11527	2.97309e-31
Carub.0007s3458	AT5G40910	-	Disease resistance protein (TIR-NBS-LRR class) family	-2.07629	1.97399e-75
Carub.0008s2257	AT5G61890	ERF114	ETHYLENE-RESPONSIVE TRANSCRIPTION FACTOR ERF114	-2.0467	9.01704e-39
Carub.0003s3489	AT2G20470	-	AGC (cAMP-dependent, cGMP-dependent and protein kinase C) kinase family protein	-2.02498	2.602e-54
Carub.0001s1179	AT1G12100	-	Bifunctional inhibitor/lipid-transfer protein/seed storage 2S albumin superfamily protein	-1.95164	4.37113e-48
Carub.0002s1578	AT1G69180	CRC	Plant-specific transcription factor YABBY family protein	-1.89262	8.91428e-08
Carub.0004s0814	AT1G03220	-	Eukaryotic aspartyl protease family protein	-1.88053	0.0247809
Carub.0001s1450	AT1G14720	XTH28	xyloglucan endotransglucosylase/hydrolase 28	-1.8385	0.0270582
Carub.0006s1793	AT5G19580	-	glyoxal oxidase-related protein	-1.82666	2.05978e-13
Carub.0001s0288	AT1G03780	TPX2	targeting protein for XKLP2	-1.82035	0.00103946
Carub.0002s1499	AT1G68480	JAG	zinc finger protein JAGGED	-1.81507	6.93302e-42
Carub.0007s3599	AT5G39760	HB23	homeobox protein 23	-1.76162	1.65109e-43
Carub.0001s0571	AT1G06360	-	Fatty acid desaturase family protein	-1.75673	1.38286e-40
Carub.0001s3478	AT1G43800	FTM1	FLORAL TRANSITION AT THE MERISTEM1; Plant stearoyl-acyl-carrier-protein desaturase family protein	-1.7484	1.40977e-130
Carub.0008s1587	AT5G55520	-	kinesin-like protein	-1.744	3.86634e-64
Carub.0003s0122	AT3G02110	SCPL25	serine carboxypeptidase-like 25	-1.74293	0.00677447
Carub.0006s1444	AT5G16250	-	unknown protein	-1.73152	2.96049e-06
Carub.0004s0894	AT2G28140	-	enabled-like protein (DUF1635)	-1.72773	1.0308e-07
Carub.0008s0132	AT5G46590	NAC096	NAC domain containing protein 96	-1.72617	0.00325096
Carub.0007s3587	AT5G39860	PRE1	basic helix-loop-helix (bHLH) DNA-binding family protein	-1.69643	1.30017e-34
Carub.0002s0684	AT1G57750	MAH1	MID-CHAIN ALKANE HYDROXYLASE 1	-1.68347	2.25354e-25
Carub.0006s1606	AT5G17830	-	Choline transporter-like protein; Plasma-membrane choline transporter family protein	-1.68328	0.0122579
Carub.0001s0183	AT1G02730	CSLD5	cellulose synthase-like D5	-1.6759	0.00275589
Carub.0002s2024	AT1G73510	-	unknown protein	-1.66361	0.0043249
Carub.0001s0146	AT1G06810	-	endonuclease/glycosyl hydrolase	-1.66094	2.22377e-07
Carub.0003s1492	AT3G15270	SPL5	squamosa promoter binding protein-like 5	-1.63849	5.53321e-05
Carub.0006s2273	AT5G10660	-	chromo domain cec-like protein	-1.62798	0.000464846
Carub.0001s2454	AT1G26480	GRF12	General Regulatory Factor 12 (GRF12)	-1.61669	0.00699342
Carub.0008s0027	AT5G47500	PME5	Pectin lyase-like superfamily protein	-1.59707	8.24653e-07
Carub.0008s0041	AT5G47370	HAT2	Homeobox-leucine zipper protein 4 (HB-4) / HD-ZIP protein	-1.5868	0.0136477
Carub.0003s2173	AT3G21680	-	unknown protein	-1.57288	2.10923e-41
Carub.0006s1359	AT5G15430	-	Plant calmodulin-binding protein-like protein	-1.55933	7.50424e-24
Carub.0004s1455	AT2G33100	CSLD1	cellulose synthase-like D1	-1.54675	2.7769e-106
Carub.0006s2292	AT5G25090	ENODL13	early nodulin-like protein 13	-1.51615	4.89581e-50
Carub.0001s0477	AT1G05440	-	C-8 sterol isomerase;igma non-opioid intracellular receptor 1	-1.50366	3.08372e-79
Carub.0008s2032	AT5G59680	-	Leucine-rich repeat protein kinase family protein	-1.49175	1.10712e-08
Carub.0005s2662	AT3G59880	-	unknown protein	-1.46915	0.0438082
Carub.0004s1558	AT2G33870	RABA1H	RAB GTPase homolog A1H	-1.46768	5.97698e-53
Carub.0003s1315	AT5G49040	-	Disease resistance-responsive (dirigent-like protein) family protein	-1.4482	1.91273e-17
Carub.0006s3023	AT4G11330	MPK5	MITOGEN-ACTIVATED PROTEIN KINASE 5	-1.44201	6.49222e-14
Carub.0006s0044	AT5G01380	-	TRIHELIX TRANSCRIPTION FACTOR GT-3A; Homeodomain-like superfamily protein	-1.43574	8.08566e-07
Carub.0001s4336	AT1G54120	-	unknown protein	-1.42356	2.82086e-11
Carub.0001s0599	AT1G06660	JASON	aspartyl/glutamyl-tRNA(Asn/Gln) amidotransferase subunit	-1.36999	3.96592e-09
Carub.0002s0055	AT1G64235	-	Bifunctional inhibitor/lipid-transfer protein/seed storage helical domain superfamily protein	-1.36748	0.00351106
Carub.0006s1079	AT5G12270	-	2-oxoglutarate (2OG) and Fe(II)-dependent oxygenase superfamily protein	-1.35811	5.27703e-14
Carub.0004s1691	AT1G32640	JIN1	JASMONATE INSENSITIVE 1; Basic helix-loop-helix (bHLH) DNA-binding family protein	-1.33839	2.87355e-12
Carub.0008s2705	AT5G67420	LBD37	LOB domain-containing protein 37	-1.33677	1.2649e-20
Carub.0007s3129	AT5G35550	MYB123	MYB-domain protein 123	-1.32947	0.0272132
Carub.0006s2996	AT4G11140	CRF1	cytokinin response factor 1	-1.30641	1.51903e-33
Carub.0006s0482	AT5G05940	ROPGEF5	ROP guanine nucleotide exchange factor 5	-1.29953	4.35261e-07
Carub.0001s1070	AT1G11125	-	unknown protein	-1.2857	1.47628e-14
Carub.0005s0744	AT3G28900	-	Ribosomal protein L34e superfamily protein	-1.27742	0.000939543
Carub.0003s1798	AT3G18220	LPP4	LIPID PHOSPHATE PHOSPHATASE 4-RELATED	-1.27518	7.27109e-18
Carub.0002s1902	AT1G72210	bHLH96	basic helix-loop-helix (bHLH) DNA-binding superfamily protein	-1.26922	1.02976e-16
Carub.0003s1731	AT3G17600	IAA31	indole-3-acetic acid inducible 31	-1.2338	0.00859612
Carub.0001s1627	AT1G16515	-	unknown protein	-1.21506	8.17017e-30
Carub.0001s2131	AT1G21925	-	Plant thionin family protein	-1.21359	5.66649e-06
Carub.0007s0248	AT4G37770	ACS8	1-amino-cyclopropane-1-carboxylate synthase 8	-1.21264	0.00776271
Carub.0002s2241	AT1G75550	-	glycine-rich protein	-1.19536	9.12249e-06
Carub.0003s1735	AT3G17640	-	Leucine-rich repeat (LRR) family protein	-1.1857	1.14244e-54
Carub.0004s0948	AT2G28510	-	Dof-type zinc finger DNA-binding family protein	-1.17074	0.0148549
Carub.0004s0008	AT2G21050	LAX2	like AUXIN RESISTANT 2	-1.16854	0.0064797
Carub.0006s2285	AT5G24990	-	enhanced disease resistance-like protein (DUF1336)	-1.16511	8.53125e-44
Carub.0004s1779	AT2G36050	OFP15	ovate family protein 15	-1.16468	6.39707e-14
Carub.0004s2004	AT2G38070	-	Protein of unknown function (DUF740)	-1.1618	7.91212e-13
Carub.0006s1329	AT5G15120	PCO1	plant cysteine oxidase 1	-1.15563	4.04022e-05
Carub.0003s0166	AT3G02550	LBD41	LOB domain-containing protein 41	-1.1548	3.75663e-51
Carub.0006s0863	AT5G10170	MIPS3	myo-inositol-1-phosphate synthase 3	-1.14681	0.0383419
Carub.0001s3502	AT1G44110	CYCA1;1	Cyclin A1;1	-1.1316	0.000133628
Carub.0007s3377	-	-	-	-1.11017	0.0351466
Carub.0001s4230	AT1G53140	DRP5A	Dynamin related protein 5A	-1.10581	7.24118e-47
Carub.0001s1934	AT1G19830	SAUR54	SMALL AUXIN UPREGULATED RNA 54	-1.09367	0.000848146
Carub.0007s2030	AT4G21120	AAT1	amino acid transporter 1	-1.09213	8.61068e-06
Carub.0003s0914	AT3G10040	-	sequence-specific DNA binding transcription factor	-1.08886	0.0309715
Carub.0002s0188	AT1G63100	-	GRAS family transcription factor	-1.08747	1.64313e-47
Carub.0008s2333	AT5G62660	-	F-box and associated interaction domains-containing protein	-1.07951	1.79004e-09
Carub.0007s1832	AT4G22950	AGL19	AGAMOUS-like 19	-1.07115	1.86313e-54
Carub.0006s1354	AT5G15350	ENODL17	early nodulin-like protein 17	-1.06435	3.17376e-05
Carub.0006s0593	AT5G07010	ST2A	hydroxyjasmonate sulfotransferase 2A	-1.06363	2.1912e-56
Carub.0004s2528	AT2G42840	PDF1	protodermal factor 1	-1.06135	0.0187108
Carub.0005s0318	AT2G04030	HSP90B	HEAT SHOCK PROTEIN 90B; Chaperone protein htpG family protein	-1.06077	1.16662e-58
Carub.0001s2042	AT1G20950	-	Phosphofructokinase family protein	-1.0582	5.60756e-17
Carub.0001s2900	AT1G30710	BBE9	FAD-binding Berberine family protein	-1.05555	2.86846e-65
Carub.0006s1256	AT5G14380	AGP6	arabinogalactan protein 6	-1.05493	0.000173053
Carub.0007s1972	AT4G21690	GA3OX3	gibberellin 3-oxidase 3	-1.05476	4.33258e-21
Carub.0007s0456	AT4G35720	-	DUF241 domain protein, putative (DUF241)	-1.05445	5.59362e-07
Carub.0003s0553	AT3G06090	-	unknown protein	-1.04778	8.13866e-60
Carub.0004s0570	AT2G25880	AUR2	ataurora2	-1.04547	0.000525515
Carub.0008s0115	AT5G46770	-	varlmgl domain-containing protein	-1.04489	4.75241e-33
Carub.0001s3262	AT1G34580	-	SUGAR TRANSPORT PROTEIN 5; Major facilitator superfamily protein	-1.04159	2.3305e-06
Carub.0003s2373	AT3G23530	-	Cyclopropane-fatty-acyl-phospholipid synthase	-1.03592	0.000882036
Carub.0007s0750	AT4G32980	ATH1	homeobox protein ATH1	-1.03374	7.16929e-26
Carub.0008s1187	AT5G51845	-	Defensin-like (DEFL) family protein	-1.03084	0.0032124
Carub.0008s0238	AT5G45630	-	senescence regulator (Protein of unknown function, DUF584)	-1.02984	2.63182e-25
Carub.0007s2086	AT4G20320	-	CTP synthase family protein	-1.02109	2.42713e-10
Carub.0003s3019	AT2G16430	PAP10	purple acid phosphatase 10	-1.01046	2.50639e-15
Carub.0001s3908	AT1G49870	-	unknown protein	-1.00902	1.89036e-37
Carub.0007s1841	AT4G22860	-	Cell cycle regulated microtubule associated protein	-1.00318	3.47034e-22
Carub.0006s1897	AT5G20635	AGG3	guanine nucleotide-binding protein subunit gamma	-1.00009	8.09428e-15
