# Supplementary material
Source: Research Square preprint supplement (doi:10.21203/rs.3.rs-8265099/v1)
Supplement: Supplementary file 2 [file dd54a336ae067a59ab9f5865.docx]

**Title:** Epigenetic regulation of fruit shape determination by *JAGGED* gene in *Capsella rubella*

**Authors:** Tian-Feng Lü1,2,3#, Xiao-Yu Chen1,2,3,4#, Nicola Trozzi5#, Wen He1,2,3,4, Quan Yuan1,2,3,4, Yu Han6, Li-Min Lu1,2,3,4, Chao-Bin Li1,2,3,4, Jie Cheng1,2,3,4, Adrien Sicard7, Yao Zhang1,2,3,4, Ya-Nan Su8, Yan-Jun Zan9,10, Michael Lenhard11, Hong-Zhi Kong1,2,3,4, Mateusz Majda5, Lars Østergaard12 and Yang Dong1,2,3,4*

**Supplementary Fig. 1-Fig. 6**


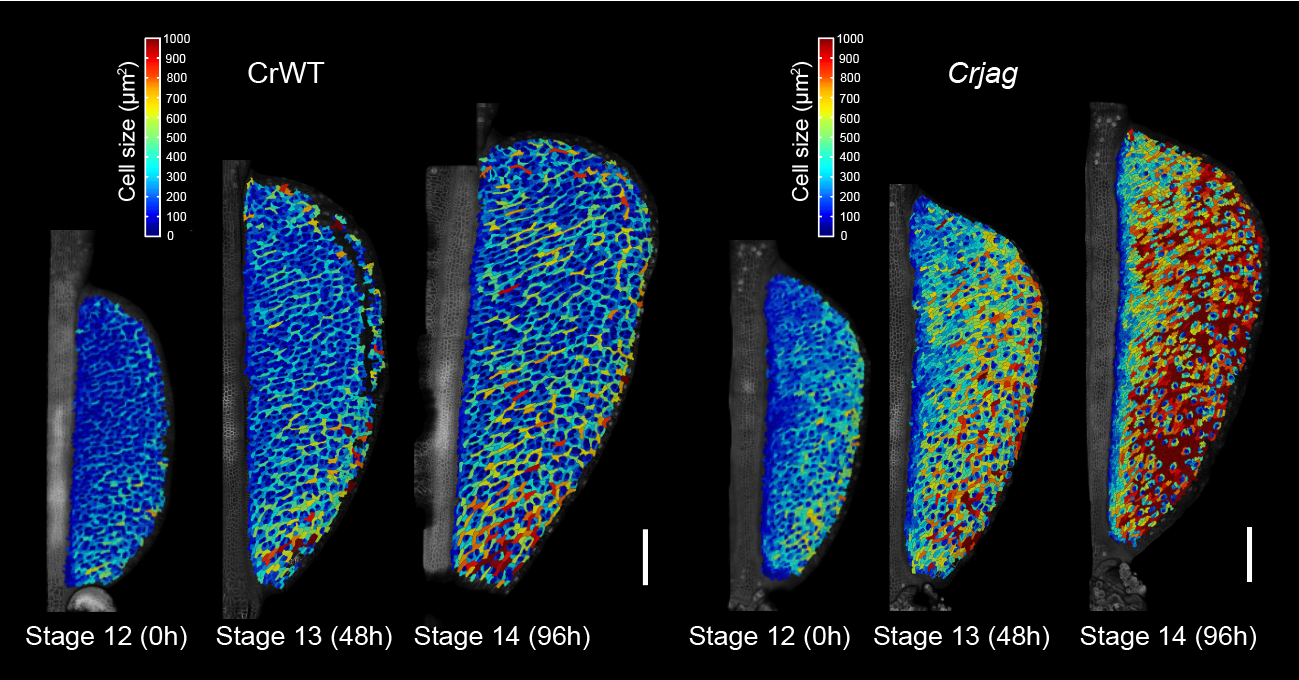


**Supplementary Fig. 1 Heatmaps of cell sizes in the CrWT and *Crjag* fruit obtained from live-cell imaging analysis (second replicate)**

Quantitative depiction of valve development using heatmaps of cell sizes in the CrWT (left panel) and *Crjag* (right panel) fruit during 96 h of time-lapse live-cell imaging analysis, corresponding to developmental stages 12, 13 and 14 (0 h, 48 h and 96 h, respectively). Cell size is quantified by cell area (μm2). In total, 13,086 and 8,389 cells were segmented for CrWT and *Crjag* fruits, respectively. Scale bars, 200 μm.


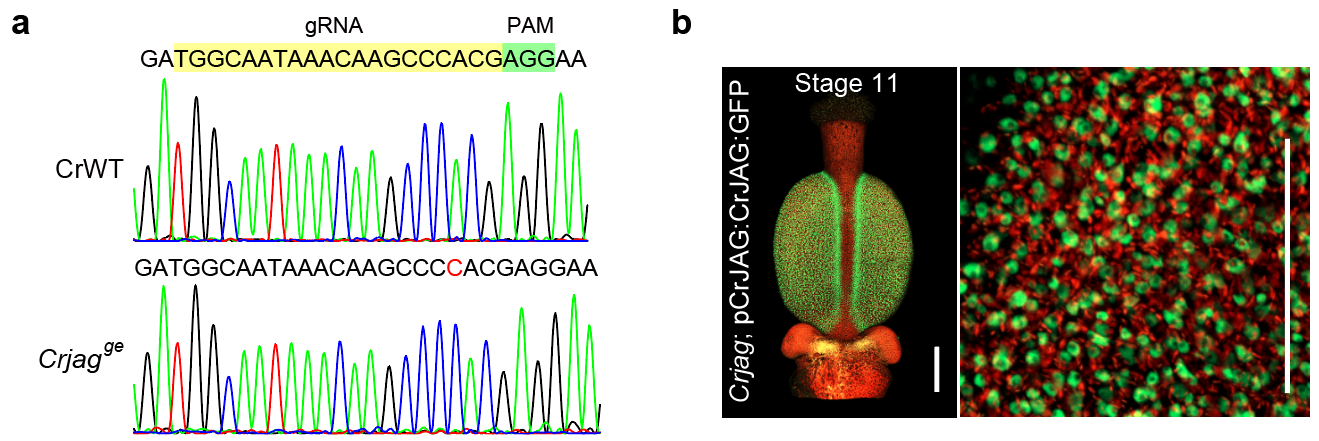
**Supplementary Fig. 2 Genotyping of the *Crjagge* allele and expression of CrJAG:GFP proteins in the fruits**

**a**, Sequencing results of the *Crjagge* allele. The single base insertion is indicated by a red letter. The guide RNA and PAM sequences are shaded in yellow and green, respectively. **b**, Confocal images of a stage-11 fruit from the *Crjag;pCrJAG:CrJAG:GFP* complemented line showing the expression and nuclear localization of the CrJAG:GFP proteins. Scale bars, 500 μm (**b**, left panel) and 50 μm (**b**, right panel)


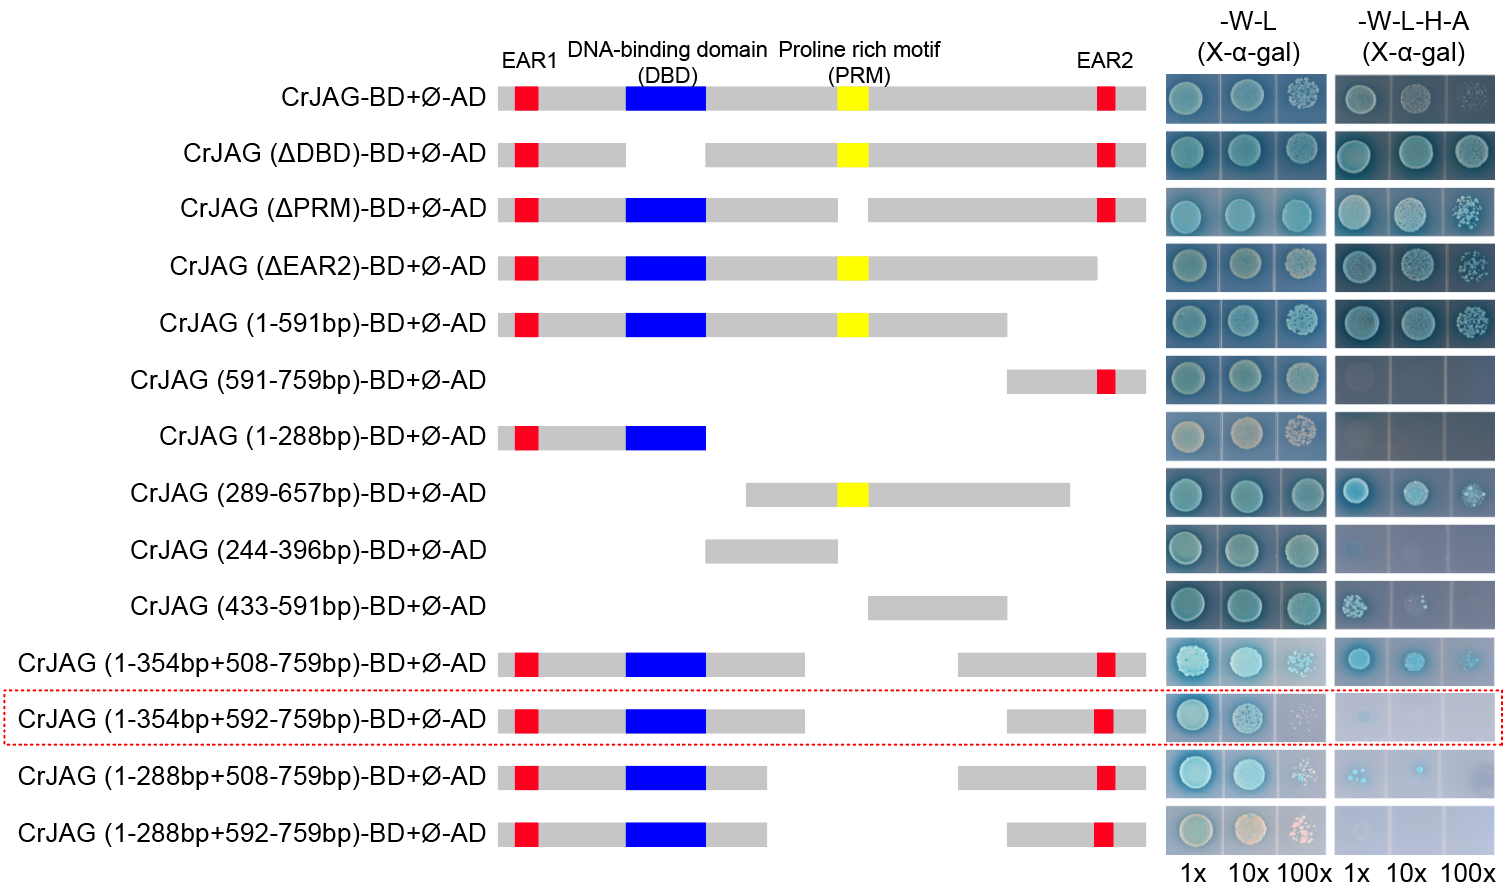
**Supplementary Fig. 3 Schematic illustrations of the CrJAG protein deletions to minimize the autoactivation activity**

The red box with dashed lines indicates the CrJAG proteins (1-354 bp + 592-759 bp) used in the Y2H library screening and protein-protein interaction test shown in Figure 3**a** and 3**d**.


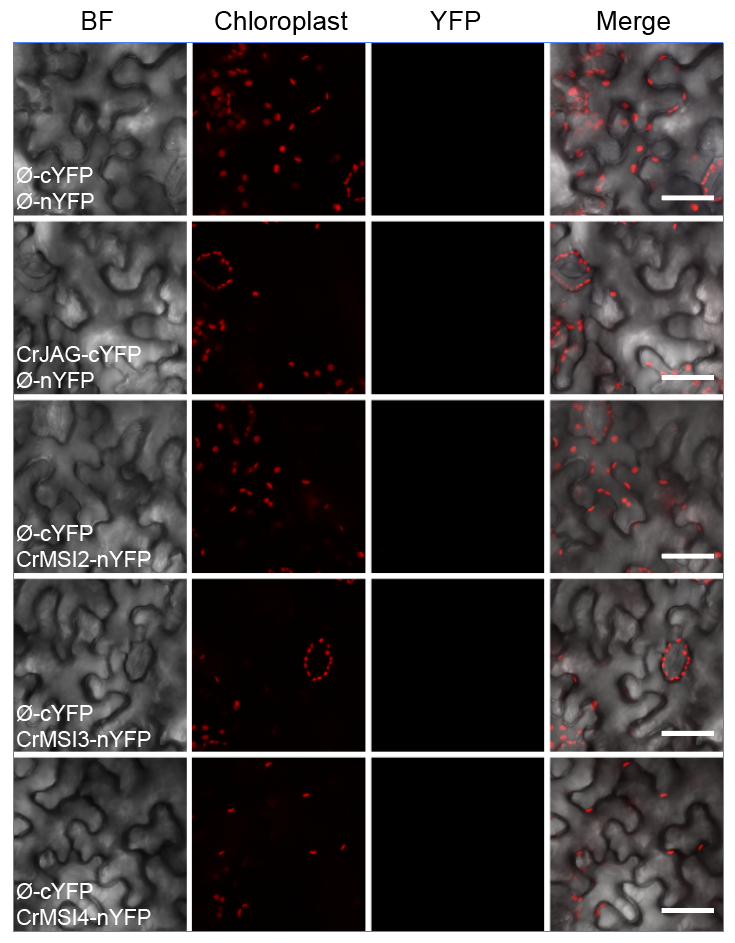
**Supplementary Fig. 4 Control experiment of the BiFC analysis**

Negative control experiment of BiFC experiment shown in Fig. 3e. Scale bars represent 50 μm.


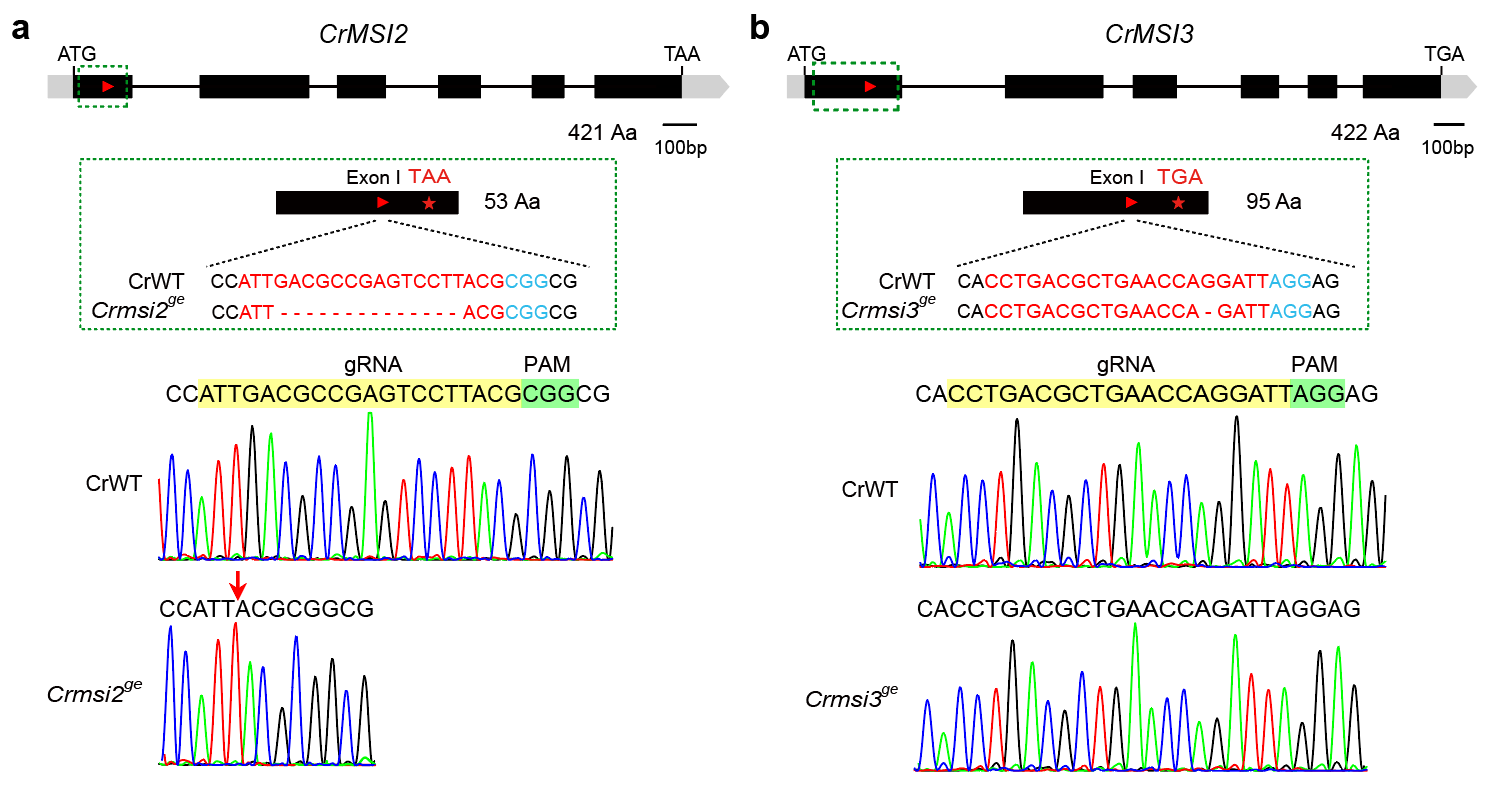


**Supplementary Fig. 5 Generation of *Crmsige* mutant by CRISPR/Cas9**

**a**, Molecular characterization of the *Crmsi2ge* mutant generated by CRISPR/Cas9. The *Crmsi2ge* mutant was resulted from a 14-bp deletion in exon 1, which disrupts the reading frame and generates a 53 aa truncated protein. **b**, Molecular characterization of the *Crmsi3ge* mutant generated by CRISPR/Cas9. The *Crmsi3ge* mutant resulted from a 1-bp deletion in exon 1, which causes a frameshift and results in a truncated protein with 95 aa. In **a**,**b**, the red triangles indicate the gRNA target sites. The guide RNA and PAM sequences were indicated by red and blue characters, respectively.


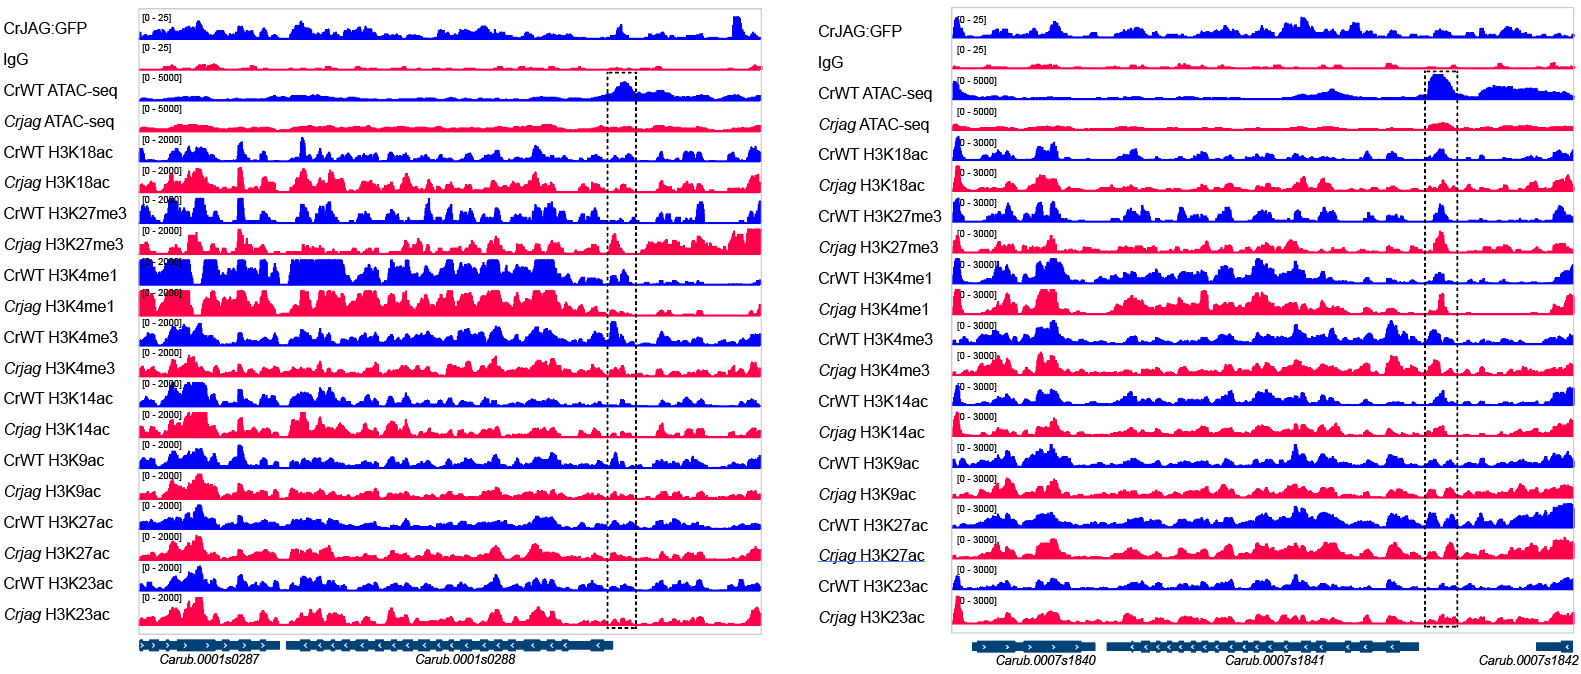

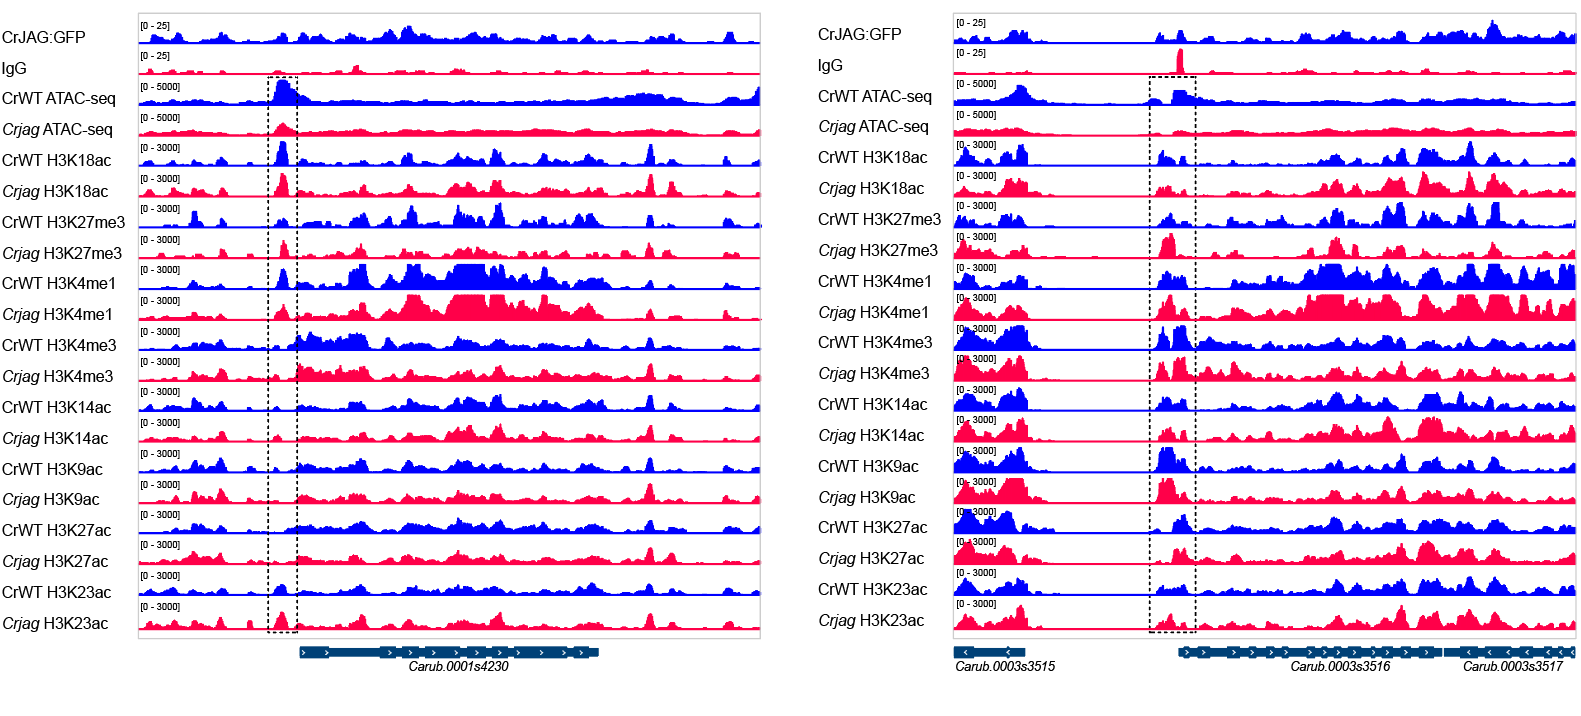

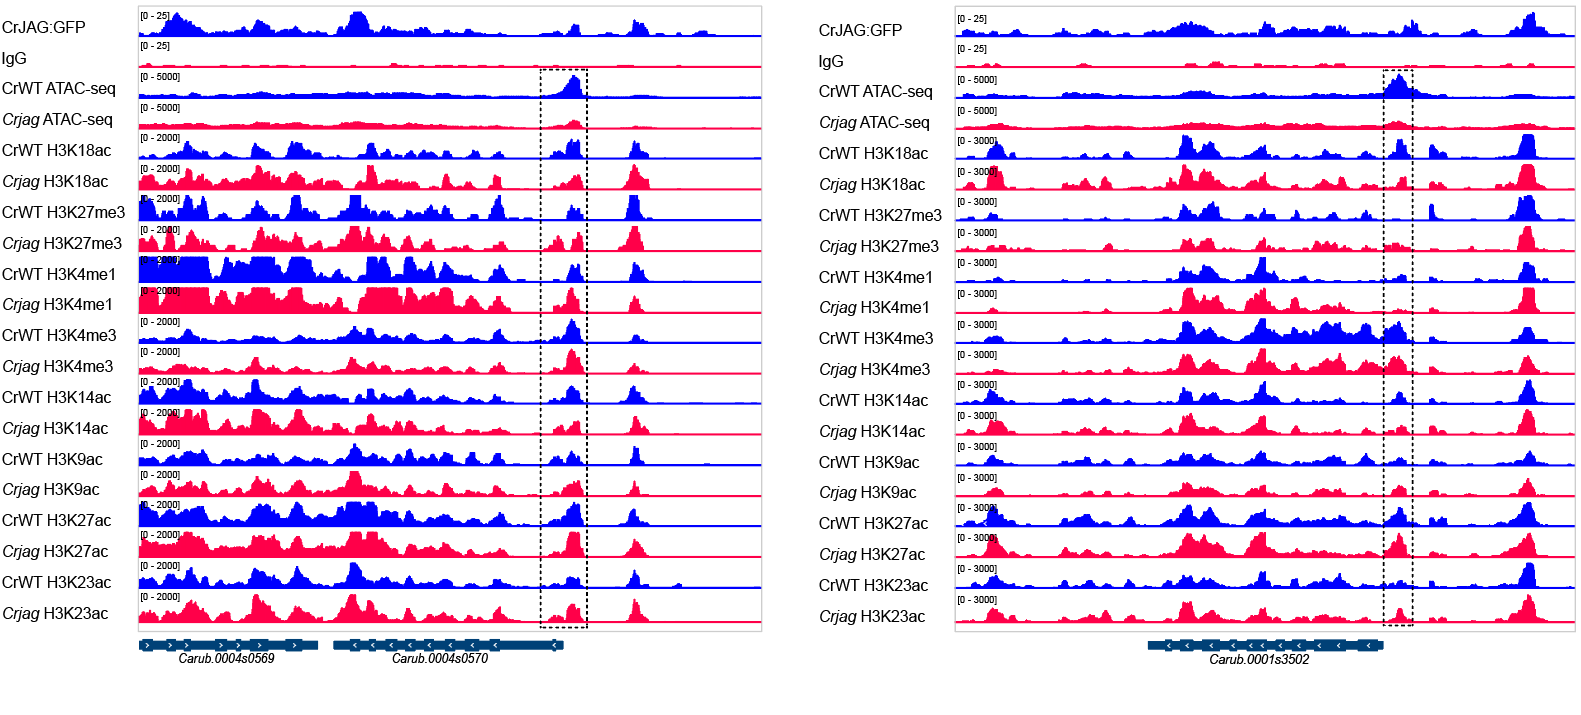
**Supplementary Fig. 6 Epigenetic modification landscape of the 10 cell-cycle related genes identified in this study**

The reciprocal epigenetic modification pattern—decreased H3K18ac coupled with increased H3K27me3—is evident at the Carub.0001s0599, Carub.0001s3502, and Carub.0004s0570/CrAUR2 loci. Dashed rectangles mark the regulatory regions where altered chromatin accessibility was detected.


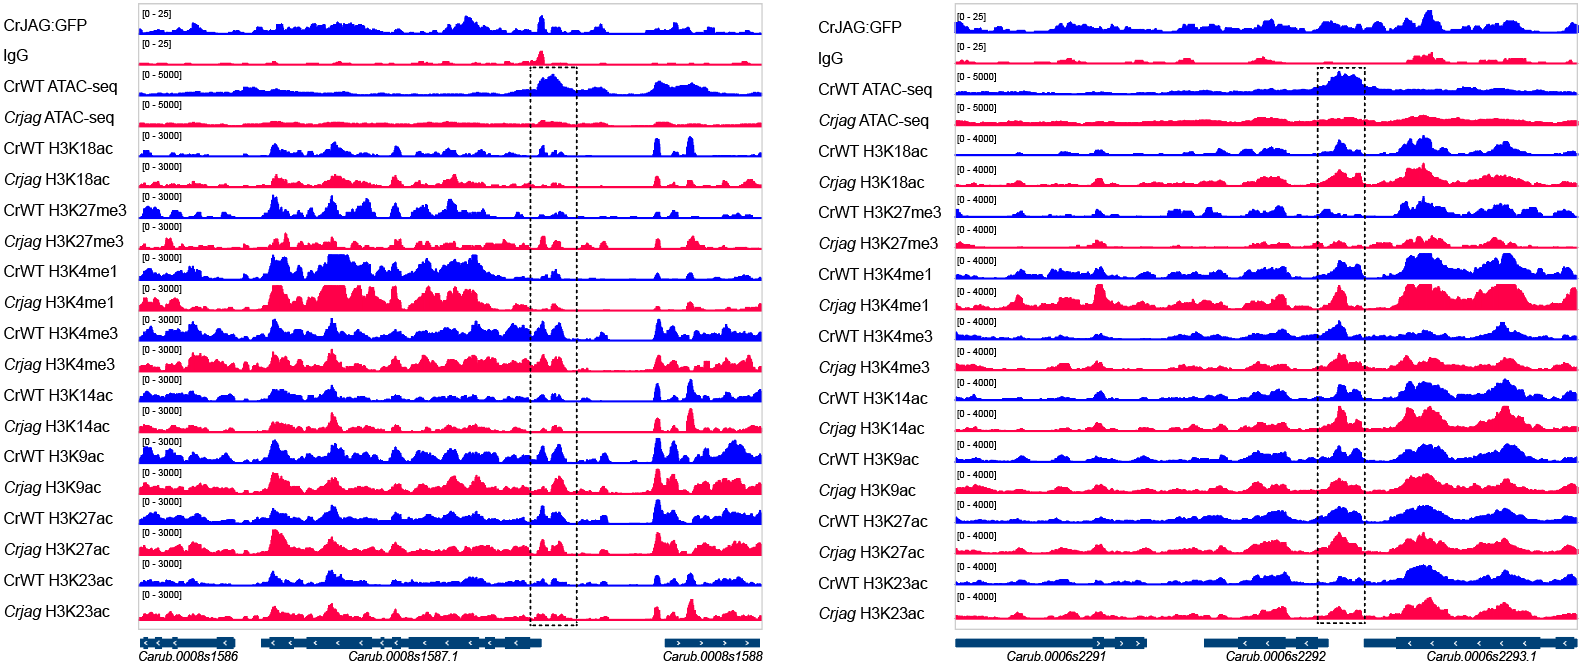

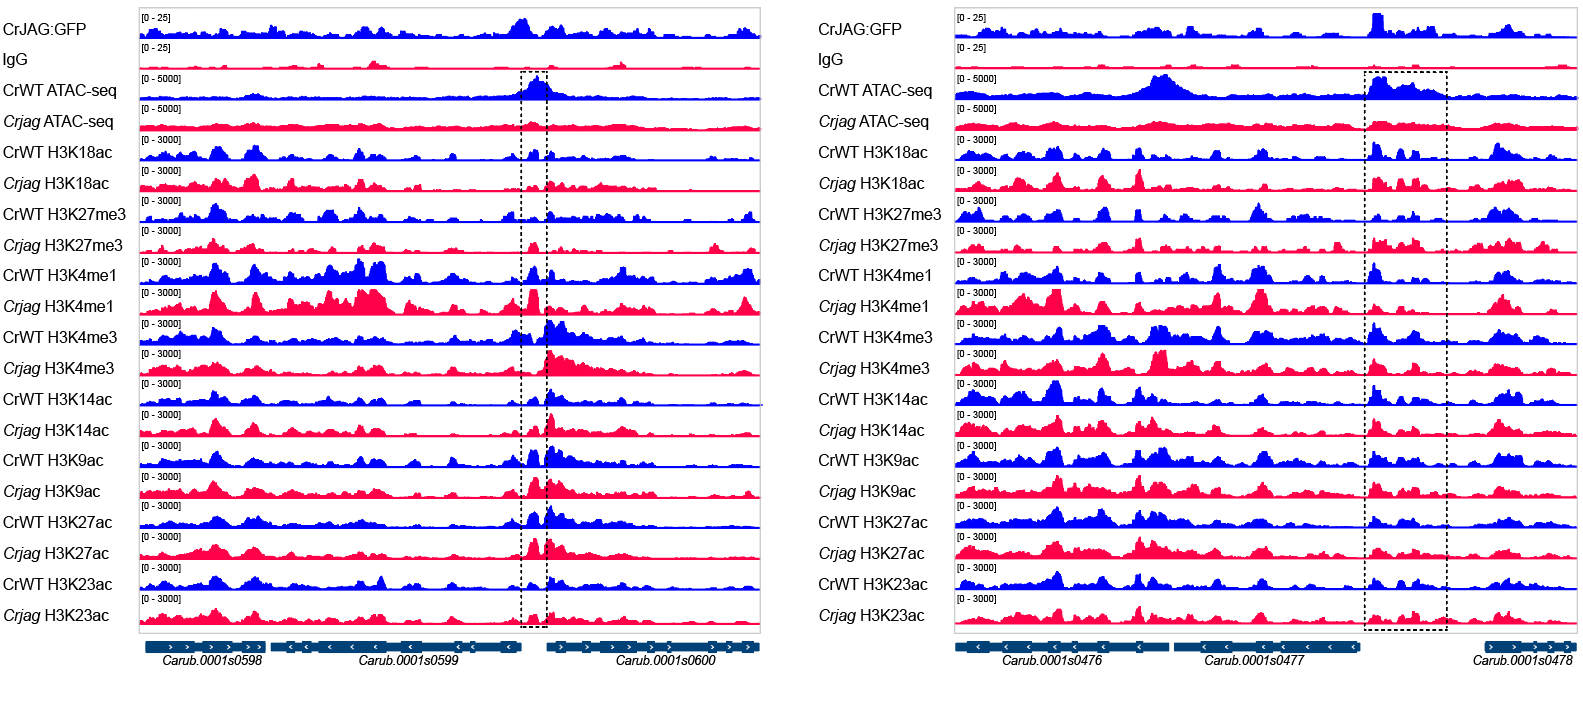
**Supplementary Fig. 6 Epigenetic modification landscape of the 10 cell-cycle related genes identified in this study (Continued)**

The reciprocal epigenetic modification pattern—decreased H3K18ac coupled with increased H3K27me3—is evident at the Carub.0001s0599, Carub.0001s3502, and Carub.0004s0570/CrAUR2 loci. Dashed rectangles mark the regulatory regions where altered chromatin accessibility was detected.
