# Supplementary material
Source: Research Square preprint supplement (doi:10.21203/rs.3.rs-8265099/v1)
Supplement: Supplementary file 3 [file 50046e1437e0c8d073143ef5.xlsx]

## Sheet: Histone modification levels
Cr.ID	At.ID	Name	Description	H3K18ac	H3K27me3	H3K4me1	H3K4me3	H3K14ac	H3K9ac	H3K27ac	H3K23ac		Histone modification levels
Carub.0001s0288	AT1G03780	TPX2	targeting protein for XKLP2											up
Carub.0001s0477	AT1G05440	-	C-8 sterol isomerase;igma non-opioid intracellular receptor 1											down
Carub.0001s0599	AT1G06660	JASON	aspartyl/glutamyl-tRNA(Asn/Gln) amidotransferase subunit											unchanged
Carub.0001s3502	AT1G44110	CYCA1;1	Cyclin A1;1
Carub.0001s4230	AT1G53140	DRP5A	Dynamin related protein 5A											Genes involved in the cell cycle process
Carub.0008s1587	AT5G55520	-	kinesin-like protein
Carub.0003s3516	AT2G20635	-	mitotic checkpoint serine/threonine-protein kinase BUB1 BETA
Carub.0004s0570	AT2G25880	AUR2	ataurora2
Carub.0007s1841	AT4G22860	-	Cell cycle regulated microtubule associated protein
Carub.0006s2292	AT5G25090	ENODL13	early nodulin-like protein 13
Carub.0001s0146	AT1G06810	-	endonuclease/glycosyl hydrolase
Carub.0001s0183	AT1G02730	CSLD5	cellulose synthase-like D5
Carub.0001s0571	AT1G06360	-	Fatty acid desaturase family protein
Carub.0001s0855	AT1G09210	CRT1b	calreticulin 1b
Carub.0001s1070	AT1G11125	-	unknown protein
Carub.0001s1179	AT1G12100	-	Bifunctional inhibitor/lipid-transfer protein/seed storage 2S albumin superfamily protein
Carub.0001s1450	AT1G14720	XTH28	xyloglucan endotransglucosylase/hydrolase 28
Carub.0001s1627	AT1G16515	-	unknown protein
Carub.0001s1770	AT1G76690	OPR2	12-oxophytodienoate reductase 2
Carub.0001s1934	AT1G19830	SAUR54	SMALL AUXIN UPREGULATED RNA 54
Carub.0001s2042	AT1G20950	-	Phosphofructokinase family protein
Carub.0001s2131	AT1G21925	-	Plant thionin family protein
Carub.0001s2454	AT1G26480	GRF12	General Regulatory Factor 12 (GRF12)
Carub.0001s2900	AT1G30710	BBE9	FAD-binding Berberine family protein
Carub.0001s3262	AT1G34580	-	SUGAR TRANSPORT PROTEIN 5; Major facilitator superfamily protein
Carub.0001s3478	AT1G43800	FTM1	FLORAL TRANSITION AT THE MERISTEM1; Plant stearoyl-acyl-carrier-protein desaturase family protein
Carub.0001s3516	AT1G44350	ILL6	IAA-amino acid hydrolase ILR1-like 6
Carub.0001s3908	AT1G49870	-	unknown protein
Carub.0001s4068	AT1G51790	-	Leucine-rich repeat protein kinase family protein
Carub.0001s4094	AT1G52040	MBP2	myrosinase-binding protein 2
Carub.0001s4336	AT1G54120	-	unknown protein
Carub.0002s0055	AT1G64235	-	Bifunctional inhibitor/lipid-transfer protein/seed storage helical domain superfamily protein
Carub.0002s0684	AT1G57750	MAH1	MID-CHAIN ALKANE HYDROXYLASE 1
Carub.0002s1122	AT1G65481	-	unknown protein
Carub.0002s1499	AT1G68480	JAG	zinc finger protein JAGGED
Carub.0002s1501	AT1G68500	-	unknown protein
Carub.0002s1578	AT1G69180	CRC	Plant-specific transcription factor YABBY family protein
Carub.0002s1902	AT1G72210	bHLH96	basic helix-loop-helix (bHLH) DNA-binding superfamily protein
Carub.0002s2024	AT1G73510	-	unknown protein
Carub.0002s2241	AT1G75550	-	glycine-rich protein
Carub.0002s2379	AT1G76930	EXT4	extensin 4
Carub.0002s2466	AT1G77760	NIA1	nitrate reductase 1
Carub.0002s2713	AT1G80450	-	VQ motif-containing protein 11
Carub.0002s2759	AT1G79910	ISTL8	IST1-LIKE 8; Regulator of Vps4 activity in the MVB pathway protein
Carub.0003s0122	AT3G02110	SCPL25	serine carboxypeptidase-like 25
Carub.0003s0166	AT3G02550	LBD41	LOB domain-containing protein 41
Carub.0003s0378	AT3G04620	DAN1	Alba DNA/RNA-binding protein
Carub.0003s0553	AT3G06090	-	unknown protein
Carub.0003s0914	AT3G10040	-	sequence-specific DNA binding transcription factor
Carub.0003s1315	AT5G49040	-	Disease resistance-responsive (dirigent-like protein) family protein
Carub.0003s1492	AT3G15270	SPL5	squamosa promoter binding protein-like 5
Carub.0003s1680	AT3G17060	-	Pectin lyase-like superfamily protein
Carub.0003s1731	AT3G17600	IAA31	indole-3-acetic acid inducible 31
Carub.0003s1735	AT3G17640	-	Leucine-rich repeat (LRR) family protein
Carub.0003s1798	AT3G18220	LPP4	LIPID PHOSPHATE PHOSPHATASE 4-RELATED
Carub.0003s2173	AT3G21680	-	unknown protein
Carub.0003s2373	AT3G23530	-	Cyclopropane-fatty-acyl-phospholipid synthase
Carub.0003s3019	AT2G16430	PAP10	purple acid phosphatase 10
Carub.0003s3292	AT2G18660	PNP-A	plant natriuretic peptide A
Carub.0003s3417	AT2G19910	-	RNA-dependent RNA polymerase family protein
Carub.0003s3489	AT2G20470	-	AGC (cAMP-dependent, cGMP-dependent and protein kinase C) kinase family protein
Carub.0004s0008	AT2G21050	LAX2	like AUXIN RESISTANT 2
Carub.0004s0315	AT2G23990	ENODL11	early nodulin-like protein 11
Carub.0004s0814	AT1G03220	-	Eukaryotic aspartyl protease family protein
Carub.0004s0894	AT2G28140	-	enabled-like protein (DUF1635)
Carub.0004s0948	AT2G28510	-	Dof-type zinc finger DNA-binding family protein
Carub.0004s1455	AT2G33100	CSLD1	cellulose synthase-like D1
Carub.0004s1558	AT2G33870	RABA1H	RAB GTPase homolog A1H
Carub.0004s1662	AT5G32613	-	Zinc knuckle (CCHC-type) family protein
Carub.0004s1691	AT1G32640	JIN1	JASMONATE INSENSITIVE 1; Basic helix-loop-helix (bHLH) DNA-binding family protein
Carub.0004s1807	AT3G52770	ZPR3	protein LITTLE ZIPPER 3
Carub.0004s2004	AT2G38070	-	Protein of unknown function (DUF740)
Carub.0004s2282	AT2G40590	-	Ribosomal protein S26e family protein
Carub.0004s2342	AT2G27030	CAM5	calmodulin 5
Carub.0004s2528	AT2G42840	PDF1	protodermal factor 1
Carub.0005s0193	AT2G03090	EXPA15	expansin A15
Carub.0005s0318	AT2G04030	HSP90B	HEAT SHOCK PROTEIN 90B; Chaperone protein htpG family protein
Carub.0005s0744	AT3G28900	-	Ribosomal protein L34e superfamily protein
Carub.0005s1893	AT3G52320	-	F-box and associated interaction domains-containing protein
Carub.0005s2662	AT3G59880	-	unknown protein
Carub.0006s0044	AT5G01380	-	TRIHELIX TRANSCRIPTION FACTOR GT-3A; Homeodomain-like superfamily protein
Carub.0006s0482	AT5G05940	ROPGEF5	ROP guanine nucleotide exchange factor 5
Carub.0006s0593	AT5G07010	ST2A	hydroxyjasmonate sulfotransferase 2A
Carub.0006s0863	AT5G10170	MIPS3	myo-inositol-1-phosphate synthase 3
Carub.0006s0905	AT5G10570	-	basic helix-loop-helix (bHLH) DNA-binding superfamily protein
Carub.0006s1079	AT5G12270	-	2-oxoglutarate (2OG) and Fe(II)-dependent oxygenase superfamily protein
Carub.0006s1256	AT5G14380	AGP6	arabinogalactan protein 6
Carub.0006s1329	AT5G15120	PCO1	plant cysteine oxidase 1
Carub.0006s1354	AT5G15350	ENODL17	early nodulin-like protein 17
Carub.0006s1359	AT5G15430	-	Plant calmodulin-binding protein-like protein
Carub.0006s1444	AT5G16250	-	unknown protein
Carub.0006s1606	AT5G17830	-	Choline transporter-like protein; Plasma-membrane choline transporter family protein
Carub.0006s1793	AT5G19580	-	glyoxal oxidase-related protein
Carub.0006s1897	AT5G20635	AGG3	guanine nucleotide-binding protein subunit gamma
Carub.0006s2273	AT5G10660	-	chromo domain cec-like protein
Carub.0006s2285	AT5G24990	-	enhanced disease resistance-like protein (DUF1336)
Carub.0006s2346	AT5G25590	-	DNA ligase (DUF632)
Carub.0006s2358	AT5G25810	TNY	ETHYLENE-RESPONSIVE TRANSCRIPTION FACTOR TINY
Carub.0006s2996	AT4G11140	CRF1	cytokinin response factor 1
Carub.0006s3023	AT4G11330	MPK5	MITOGEN-ACTIVATED PROTEIN KINASE 5
Carub.0006s3265	AT4G04750	-	Major facilitator superfamily protein
Carub.0007s0248	AT4G37770	ACS8	1-amino-cyclopropane-1-carboxylate synthase 8
Carub.0007s0456	AT4G35720	-	DUF241 domain protein, putative (DUF241)
Carub.0007s0593	AT4G34400	-	AP2/B3-like transcriptional factor family protein
Carub.0007s0750	AT4G32980	ATH1	homeobox protein ATH1
Carub.0007s1535	AT4G25630	FIB2	fibrillarin 2
Carub.0007s1832	AT4G22950	AGL19	AGAMOUS-like 19
Carub.0007s1840	AT4G22880	LDOX	leucoanthocyanidin dioxygenase
Carub.0007s1972	AT4G21690	GA3OX3	gibberellin 3-oxidase 3
Carub.0007s2030	AT4G21120	AAT1	amino acid transporter 1
Carub.0007s2086	AT4G20320	-	CTP synthase family protein
Carub.0007s2287	AT4G18395	-	ubiquitin-protein ligase arkadia-A
Carub.0007s3129	AT5G35550	MYB123	MYB-domain protein 123
Carub.0007s3377	-	-	-
Carub.0007s3458	AT5G40910	-	Disease resistance protein (TIR-NBS-LRR class) family
Carub.0007s3583	AT5G39890	-	2-aminoethanethiol dioxygenase, putative (DUF1637)
Carub.0007s3587	AT5G39860	PRE1	basic helix-loop-helix (bHLH) DNA-binding family protein
Carub.0007s3599	AT5G39760	HB23	homeobox protein 23
Carub.0008s0027	AT5G47500	PME5	Pectin lyase-like superfamily protein
Carub.0008s0041	AT5G47370	HAT2	Homeobox-leucine zipper protein 4 (HB-4) / HD-ZIP protein
Carub.0008s0115	AT5G46770	-	varlmgl domain-containing protein
Carub.0008s0132	AT5G46590	NAC096	NAC domain containing protein 96
Carub.0008s0238	AT5G45630	-	senescence regulator (Protein of unknown function, DUF584)
Carub.0008s0610	AT5G42800	DFR	dihydroflavonol 4-reductase
Carub.0008s1187	AT5G51845	-	Defensin-like (DEFL) family protein
Carub.0008s1832	AT5G57800	CER3	VERY-LONG-CHAIN ALDEHYDE DECARBONYLASE
Carub.0008s2031	AT5G59670	-	Leucine-rich repeat protein kinase family protein
Carub.0008s2032	AT5G59680	-	Leucine-rich repeat protein kinase family protein
Carub.0008s2257	AT5G61890	ERF114	ETHYLENE-RESPONSIVE TRANSCRIPTION FACTOR ERF114
Carub.0008s2333	AT5G62660	-	F-box and associated interaction domains-containing protein
Carub.0008s2344	AT5G62710	-	Leucine-rich repeat protein kinase family protein
Carub.0008s2393	AT5G63170	-	GDSL-like Lipase/Acylhydrolase superfamily protein
Carub.0008s2656	AT5G65690	PCK2	phosphoenolpyruvate carboxykinase 2
Carub.0008s2705	AT5G67420	LBD37	LOB domain-containing protein 37
Carub.0008s2766	AT5G66820	-	transmembrane protein 131 homolog
Carub.0002s0188	AT1G63100	-	GRAS family transcription factor
Carub.0004s1779	AT2G36050	OFP15	ovate family protein 15
Carub.0007s1587	AT4G25160	-	U-box domain-containing protein kinase family protein
