# Supplementary material
Source: Research Square preprint supplement (doi:10.21203/rs.3.rs-8265099/v1)
Supplement: Supplementary file 4 [file 6caa2468d34a657c3c3e6f61.xlsx]

## Sheet: Data S1
Categroy	Cr.ID	At.ID	Name	Description	Protein.Group	Protein.Names
Y2H&IP-MS1&IP-MS2	Carub.0007s0526	AT4G35050	MSI3	MULTICOPY SUPPRESSOR OF IRA1 3	R0GWB8	R0GWB8_9BRAS
Y2H&IP-MS1&IP-MS2	Carub.0007s1306	AT4G27750	ISI1	Impaired sucrose induction 1	R0GMR2	R0GMR2_9BRAS
Y2H&IP-MS1&IP-MS2	Carub.0005s0465	AT3G26640	LWD2	Transducin/WD40 repeat-like superfamily protein	R0H4U7	R0H4U7_9BRAS
Y2H&IP-MS1&IP-MS2	Carub.0008s2396	AT5G63200	-	tetratricopeptide repeat (TPR)-containing protein	R0GQM5	R0GQM5_9BRAS
Y2H&IP-MS1	Carub.0006s0208	AT5G03280	EIN2	NRAMP metal ion transporter family protein	R0FM89	R0FM89_9BRAS
Y2H&IP-MS1	Carub.0007s0681	AT4G33625	-	COPI associated protein (COPI_assoc); Golgi apparatus membrane protein TVP15	R0H4E1	R0H4E1_9BRAS
Y2H&IP-MS1	Carub.0003s1372	AT3G14110	FLU	FLUORESCENT IN BLUE LIGHT; Tetratricopeptide repeat (TPR)-like superfamily protein	R0I431	R0I431_9BRAS
Y2H&IP-MS1	Carub.0005s1303	AT3G46780	PTAC16	plastid transcriptionally active 16	R0H1U6	R0H1U6_9BRAS
Y2H&IP-MS1	Carub.0005s2861	AT3G61870	-	unknown protein	R0H5M8	R0H5M8_9BRAS
Y2H&IP-MS1	Carub.0008s2208	AT5G61410	RPE	D-ribulose-5-phosphate-3-epimerase	R0GB28	R0GB28_9BRAS
Y2H&IP-MS2	Carub.0006s0183	AT5G03040	IQD2	IQ-domain 2	R0HAH5	R0HAH5_9BRAS
Y2H&IP-MS2	Carub.0006s0514	AT5G06260	-	CALCIUM-BINDING EF-HAND FAMILY PROTEIN-RELATE; TLDc domain-containing protein (Fragment)	R0HAK7	R0HAK7_9BRAS
Y2H&IP-MS2	Carub.0007s1204	AT4G28610	PHR1	phosphate starvation response 1	R0GX14	R0GX14_9BRAS
Y2H&IP-MS2	Carub.0001s1952	AT1G19990	-	nucleolin	R0GQN8	R0GQN8_9BRAS
Y2H&IP-MS2	Carub.0002s2304	AT1G76150	ECH2	enoyl-CoA hydratase 2	R0GFQ2	R0GFQ2_9BRAS
Y2H&IP-MS2	Carub.0004s1093	-	-	unknown protein	R0HFW2	R0HFW2_9BRAS
IP-MS1&IP-MS2	Carub.0008s1107	AT5G51070	CLPD	Clp ATPase	K4FQE9	K4FQE9_9BRAS
IP-MS1&IP-MS2	Carub.0006s3015	AT4G11270	-	Transducin/WD40 repeat-like superfamily protein	R0FD67;R0H4Y5	R0FD67_9BRAS;R0H4Y5_9BRAS
IP-MS1&IP-MS2	Carub.0006s1175	AT5G13590	-	BTZ domain-containing protein	R0FD93	R0FD93_9BRAS
IP-MS1&IP-MS2	Carub.0006s3091	AT4G11800	-	Calcineurin-like metallo-phosphoesterase superfamily protein	R0FCQ4	R0FCQ4_9BRAS
IP-MS1&IP-MS2	Carub.0006s3250	AT4G04670	-	Met-10+ like family protein / kelch repeat-containing protein	R0GSP1	R0GSP1_9BRAS
IP-MS1&IP-MS2	Carub.0006s1484	AT5G16630	RAD4	DNA repair protein Rad4 family	R0H5F0	R0H5F0_9BRAS
IP-MS1&IP-MS2	Carub.0006s0769	AT5G08720	-	polyketide cyclase/dehydrase/lipid transporter	R0GQU9	R0GQU9_9BRAS
IP-MS1&IP-MS2	Carub.0006s1767	AT5G19330	ARIA	ARM repeat protein interacting with ABF2	R0GT66;R0H919	R0GT66_9BRAS;R0H919_9BRAS
IP-MS1&IP-MS2	Carub.0006s1931	AT5G20990	B73	molybdopterin biosynthesis CNX1 protein / molybdenum cofactor biosynthesis enzyme CNX1 (CNX1)	R0H6R6	R0H6R6_9BRAS
IP-MS1&IP-MS2	Carub.0006s1132	AT5G13150	EXO70C1	exocyst complex component EXO70C1	R0H737	R0H737_9BRAS
IP-MS1&IP-MS2	Carub.0006s1576	AT5G17530	-	phosphoglucosamine mutase family protein	R0FE88	R0FE88_9BRAS
IP-MS1&IP-MS2	Carub.0006s2230	AT5G24470	PRR5	pseudo-response regulator 5	R0FDP6	R0FDP6_9BRAS
IP-MS1&IP-MS2	Carub.0006s3677	AT4G00490	BAM2	beta-amylase 2	R0GTV9	R0GTV9_9BRAS
IP-MS1&IP-MS2	Carub.0006s0417	AT5G05240	-	cation-transporting ATPase	R0FBG3	R0FBG3_9BRAS
IP-MS1&IP-MS2	Carub.0006s0269	AT5G03780	TRFL10	TRF-like 10	R0HA35	R0HA35_9BRAS
IP-MS1&IP-MS2	Carub.0006s1687	AT5G18590	-	Galactose oxidase/kelch repeat superfamily protein	R0FF01	R0FF01_9BRAS
IP-MS1&IP-MS2	Carub.0006s3669	AT4G00550	DGD2	digalactosyl diacylglycerol deficient 2	R0FEF5	R0FEF5_9BRAS
IP-MS1&IP-MS2	Carub.0006s2834	AT4G09500	-	anthocyanidin 3-O-glucoside 2'''-O-xylosyltransferase	R0FFD7	R0FFD7_9BRAS
IP-MS1&IP-MS2	Carub.0006s3589	AT4G00870	BHLH14	basic helix-loop-helix (bHLH) DNA-binding superfamily protein; TRANSCRIPTION FACTOR BHLH14	R0GV07	R0GV07_9BRAS
IP-MS1&IP-MS2	Carub.0006s1476	AT5G16560	KAN	Homeodomain-like superfamily protein;TRANSCRIPTION REPRESSOR KAN	R0H7C9	R0H7C9_9BRAS
IP-MS1&IP-MS2	Carub.0006s1277	AT5G14600	-	S-adenosyl-L-methionine-dependent methyltransferases superfamily protein	R0HAX3	R0HAX3_9BRAS
IP-MS1&IP-MS2	Carub.0006s0716	AT5G08280	HEMC	hydroxymethylbilane synthase	R0FFW0	R0FFW0_9BRAS
IP-MS1&IP-MS2	Carub.0006s2146	AT5G23710	RPC6	DNA-directed RNA polymerase III subunit RPC6 (RPC6, POLR3F)	R0H454	R0H454_9BRAS
IP-MS1&IP-MS2	Carub.0006s0723	AT5G08335	STE14	protein-S-isoprenylcysteine O-methyltransferase (ICMT, STE14)	R0FCF2	R0FCF2_9BRAS
IP-MS1&IP-MS2	Carub.0006s2019	AT5G22450	-	unknown protein	R0FJB6	R0FJB6_9BRAS
IP-MS1&IP-MS2	Carub.0006s1195	AT5G13770	-	Pentatricopeptide repeat (PPR-like) superfamily protein	R0HBR2	R0HBR2_9BRAS
IP-MS1&IP-MS2	Carub.0006s3543	AT4G01790	-	Ribosomal protein L7Ae/L30e/S12e/Gadd45 family protein	R0HFJ2	R0HFJ2_9BRAS
IP-MS1&IP-MS2	Carub.0006s2761	AT4G09020	ISA3	isoamylase 3, chloroplastic	R0FL83	R0FL83_9BRAS
IP-MS1&IP-MS2	Carub.0006s0521	AT5G06320	NHL3	NDR1/HIN1-like 3	R0FK96	R0FK96_9BRAS
IP-MS1&IP-MS2	Carub.0006s2009	AT5G22350	ELM1	Mitochondrial fission ELM1 (Mito_fiss_Elm1)	R0HD36	R0HD36_9BRAS
IP-MS1&IP-MS2	Carub.0007s1025	AT4G30350	SMXL2	PROTEIN SMAX1-LIKE 2	R0GFD4	R0GFD4_9BRAS
IP-MS1&IP-MS2	Carub.0007s2202	AT4G19130	RPA1E	REPLICATION PROTEIN A 70 KDA DNA-BINDING SUBUNIT C-RELATED	R0F3Q6	R0F3Q6_9BRAS
IP-MS1&IP-MS2	Carub.0007s1986	AT4G21550	VAL3	B3 domain-containing transcription factor VP1/ABI3-like 3	R0GUV9	R0GUV9_9BRAS
IP-MS1&IP-MS2	Carub.0007s1052	AT4G30080	ARF16	auxin response factor 16	R0GY89	R0GY89_9BRAS
IP-MS1&IP-MS2	Carub.0007s3188	AT5G36210	-	alpha/beta-Hydrolases superfamily protein	R0F369	R0F369_9BRAS
IP-MS1&IP-MS2	Carub.0007s0770	AT4G32790	-	Exostosin family protein	R0GYG6	R0GYG6_9BRAS
IP-MS1&IP-MS2	Carub.0007s3447	AT5G41020	-	myb family transcription factor	R0GFG2	R0GFG2_9BRAS
IP-MS1&IP-MS2	Carub.0007s2348	AT4G17880	MYC4	Basic helix-loop-helix (bHLH) DNA-binding family protein	R0F4A8	R0F4A8_9BRAS
IP-MS1&IP-MS2	Carub.0007s0596	AT4G34370	ARI1	E3 ubiquitin-protein ligase	R0GYN3	R0GYN3_9BRAS
IP-MS1&IP-MS2	Carub.0007s2158	AT4G19600	CYCT1;4	Cyclin family protein	R0GYX1	R0GYX1_9BRAS
IP-MS1&IP-MS2	Carub.0007s0367	AT4G36650	PBRP	plant-specific TFIIB-related protein	R0F3U3	R0F3U3_9BRAS
IP-MS1&IP-MS2	Carub.0007s3681	AT5G39050	PMAT1	HXXXD-type acyl-transferase family protein	R0F595	R0F595_9BRAS
IP-MS1&IP-MS2	Carub.0007s0235	AT4G37880	RMD5	PROTEIN RMD5 HOMOLOG; LisH/CRA/RING-U-box domains-containing protein	R0H031	R0H031_9BRAS
IP-MS1&IP-MS2	Carub.0007s2075	AT4G20410	GSNAP	gamma-soluble NSF attachment protein	R0GJR9	R0GJR9_9BRAS
IP-MS1&IP-MS2	Carub.0007s0532	AT4G34990	MYB32	myb domain protein 32	R0F5U8	R0F5U8_9BRAS
IP-MS1&IP-MS2	Carub.0007s3052	AT5G32450	-	RNA binding (RRM/RBD/RNP motifs) family protein	R0GY21	R0GY21_9BRAS
IP-MS1&IP-MS2	Carub.0007s2681	AT4G15715	-	CYSTATIN-LIKE PROTEIN-RELATED	R0GKR4	R0GKR4_9BRAS
IP-MS1&IP-MS2	Carub.0007s3525	AT5G40370	GRXC2	Glutaredoxin family protein	R0F7W2	R0F7W2_9BRAS
IP-MS1&IP-MS2	Carub.0007s3579	AT5G39940	-	FAD/NAD(P)-binding oxidoreductase family protein	R0F308	R0F308_9BRAS
IP-MS1&IP-MS2	Carub.0007s0961	AT4G30935	WRKY32	WRKY DNA-binding protein 32-related	R0GNC4	R0GNC4_9BRAS
IP-MS1&IP-MS2	Carub.0007s1193	AT4G28710	XIH	Myosin XI H; Myosin-14; Myosin family protein with Dil domain-containing protein	R0H1C3	R0H1C3_9BRAS
IP-MS1&IP-MS2	Carub.0007s3389	AT5G41580	PIAL2	PROTEIN INHIBITOR OF ACTIVATED STAT LIKE 2; RING/U-box superfamily protein	R0H502	R0H502_9BRAS
IP-MS1&IP-MS2	Carub.0001s1653	AT1G16800	-	P-loop containing nucleoside triphosphate hydrolases superfamily protein	R0ILM7	R0ILM7_9BRAS
IP-MS1&IP-MS2	Carub.0001s0798	AT1G08620	JMJ16	putative lysine-specific demethylase JMJ16	R0I3E1	R0I3E1_9BRAS
IP-MS1&IP-MS2	Carub.0001s3944	AT1G50360	VIIIA	Myosin VIII A; P-loop containing nucleoside triphosphate hydrolases superfamily protein	R0GUP6	R0GUP6_9BRAS
IP-MS1&IP-MS2	Carub.0001s1364	AT1G13940	-	unknown protein	R0GUU6	R0GUU6_9BRAS
IP-MS1&IP-MS2	Carub.0001s3113	AT1G32810	-	PHD FINGER PROTEIN 13; serine-rich adhesin for platelets	R0IB62	R0IB62_9BRAS
IP-MS1&IP-MS2	Carub.0001s0698	AT1G07650	-	Leucine-rich repeat transmembrane protein kinase	R0GV78	R0GV78_9BRAS
IP-MS1&IP-MS2	Carub.0001s4221	AT1G53050	-	Protein kinase superfamily protein; probable serine/threonine-protein kinase	R0I3H6	R0I3H6_9BRAS
IP-MS1&IP-MS2	Carub.0001s4022	AT1G51350	-	ARM repeat superfamily protein	R0IBJ0	R0IBJ0_9BRAS
IP-MS1&IP-MS2	Carub.0001s1670	AT1G16970	KU70	ATP-dependent DNA helicase 2 subunit Ku70-like protein	R0IRJ3	R0IRJ3_9BRAS
IP-MS1&IP-MS2	Carub.0001s2668	AT1G28240	-	HEXOSYLTRANSFERASE MUCI70-RELATED	R0GLK6	R0GLK6_9BRAS
IP-MS1&IP-MS2	Carub.0001s0790	AT1G08540	SIG2	RNApolymerase sigma subunit 2	R0IC61	R0IC61_9BRAS
IP-MS1&IP-MS2	Carub.0001s1924	AT1G19700	BEL10	BEL1-like homeodomain 10	R0GWD7	R0GWD7_9BRAS
IP-MS1&IP-MS2	Carub.0001s2548	AT1G24610	-	histone-lysine N-methyltransferase setd 3; Rubisco methyltransferase family protein	R0IS10	R0IS10_9BRAS
IP-MS1&IP-MS2	Carub.0001s2618	AT1G27680	APL2	ADPGLC-PPase large subunit	R0IF04	R0IF04_9BRAS
IP-MS1&IP-MS2	Carub.0001s3949	AT1G50420	SCL3	scarecrow-like protein 3	R0GWE7	R0GWE7_9BRAS
IP-MS1&IP-MS2	Carub.0001s0287	AT1G03770	RNF1_2	E3 ubiquitin-protein ligase RNF1/2 [EC:6.3.2.19] (RNF1_2)	R0ISF0	R0ISF0_9BRAS
IP-MS1&IP-MS2	Carub.0001s0475	AT1G05410	-	protein OBERON 1	R0GWX0	R0GWX0_9BRAS
IP-MS1&IP-MS2	Carub.0001s4486	AT1G54310	-	S-adenosyl-L-methionine-dependent methyltransferases superfamily protein	R0GXB9	R0GXB9_9BRAS
IP-MS1&IP-MS2	Carub.0001s1938	AT1G19860	-	ZINC FINGER CCCH DOMAIN-CONTAINING PROTEIN 45-RELATED	R0IPE4	R0IPE4_9BRAS
IP-MS1&IP-MS2	Carub.0001s0304	AT1G03900	NAP4	non-intrinsic ABC protein 4	R0GR42;R0IIH6	R0GR42_9BRAS;R0IIH6_9BRAS
IP-MS1&IP-MS2	Carub.0001s0839	AT1G09070	SRC2	soybean regulated by cold-2	R0IMF8	R0IMF8_9BRAS
IP-MS1&IP-MS2	Carub.0001s3042	AT1G32100	PRR1	pinoresinol reductase 1	R0I7H0	R0I7H0_9BRAS
IP-MS1&IP-MS2	Carub.0001s0374	AT1G04530	TPR4	Tetratricopeptide repeat (TPR)-like superfamily protein	R0ID77	R0ID77_9BRAS
IP-MS1&IP-MS2	Carub.0001s2972	AT1G31280	AGO2	ARGONAUTE 2	R0GSH3	R0GSH3_9BRAS
IP-MS1&IP-MS2	Carub.0001s1615	AT1G16410	CYP79F1	cytochrome p450 79f1	R0GS57	R0GS57_9BRAS
IP-MS1&IP-MS2	Carub.0001s1165	AT1G11950	JMJ25	lysine-specific demethylase; transcription factor jumonji (jmjC) domain-containing protein	R0GP80	R0GP80_9BRAS
IP-MS1&IP-MS2	Carub.0001s4316	AT1G53880	-	translation initiation factor eIF-2B subunit alpha	R0IHD0	R0IHD0_9BRAS
IP-MS1&IP-MS2	Carub.0001s4481	AT1G54360	TAF6B	transcription initiation factor TFIID subunit 6b	R0GNV8	R0GNV8_9BRAS
IP-MS1&IP-MS2	Carub.0001s1640	AT1G16670	-	cold-responsive protein kinase 1	R0GQ05	R0GQ05_9BRAS
IP-MS1&IP-MS2	Carub.0001s2045	AT1G20980	SPL14	squamosa promoter binding protein-like 14	R0IEQ3	R0IEQ3_9BRAS
IP-MS1&IP-MS2	Carub.0001s4408	AT1G55560	sks14	SKU5 similar 14	R0I3B3	R0I3B3_9BRAS
IP-MS1&IP-MS2	Carub.0003s2962	AT5G45150	RTL3	ribonuclease 3-like protein 3	R0HJA2	R0HJA2_9BRAS
IP-MS1&IP-MS2	Carub.0003s0719	AT3G07610	IBM1	increase in bonsai methylation 1; Transcription factor jumonji (jmjC) domain-containing protein	R0I0D1	R0I0D1_9BRAS
IP-MS1&IP-MS2	Carub.0003s1702	AT3G17310	DRM3	S-adenosyl-L-methionine-dependent methyltransferases superfamily protein	R0HJW1	R0HJW1_9BRAS
IP-MS1&IP-MS2	Carub.0003s2131	AT3G21295	-	Tudor/PWWP/MBT superfamily protein	R0I129	R0I129_9BRAS
IP-MS1&IP-MS2	Carub.0003s0931	AT3G10160	DFC	DHFS-FPGS homolog C	R0G422	R0G422_9BRAS
IP-MS1&IP-MS2	Carub.0003s2939	AT2G15620	NIR1	nitrite reductase 1	R0HXG4	R0HXG4_9BRAS
IP-MS1&IP-MS2	Carub.0003s1191	AT3G12570	FYD	FYD	R0HY20	R0HY20_9BRAS
IP-MS1&IP-MS2	Carub.0003s0978	AT3G10540	PDPK1	3-phosphoinositide-dependent protein kinase 1-RELATED	R0HL49	R0HL49_9BRAS
IP-MS1&IP-MS2	Carub.0003s0320	AT3G03950	ECT1	evolutionarily conserved C-terminal region 1	R0G528	R0G528_9BRAS
IP-MS1&IP-MS2	Carub.0003s2415	AT3G23840	CER26-LIKE	PROTEIN ECERIFERUM 26-LIKE; HXXXD-type acyl-transferase family protein	R0G533	R0G533_9BRAS
IP-MS1&IP-MS2	Carub.0003s3289	AT2G18630	-	unknown protein	R0G2J5	R0G2J5_9BRAS
IP-MS1&IP-MS2	Carub.0003s2169	AT3G21640	FKBP42	peptidyl-prolyl cis-trans isomerase FKBP42	R0HMB8;R0I3B5	R0HMB8_9BRAS;R0I3B5_9BRAS
IP-MS1&IP-MS2	Carub.0003s0127	AT3G02150	TCP13	plastid transcription factor 1; TRANSCRIPTION FACTOR TCP13	R0HZ82	R0HZ82_9BRAS
IP-MS1&IP-MS2	Carub.0003s1233	AT3G12980	HAC5	histone acetyltransferase of the CBP family 5	R0G8V8	R0G8V8_9BRAS
IP-MS1&IP-MS2	Carub.0003s0383	AT3G04670	WRKY39	WRKY DNA-binding protein 39	R0I6V7	R0I6V7_9BRAS
IP-MS1&IP-MS2	Carub.0003s3303	AT2G18760	CHR8	chromatin remodeling 8	R0I2S8	R0I2S8_9BRAS
IP-MS1&IP-MS2	Carub.0003s3522	AT2G20710	-	Tetratricopeptide repeat (TPR)-like superfamily protein	R0GA20	R0GA20_9BRAS
IP-MS1&IP-MS2	Carub.0003s2638	AT3G23280	XBAT35	ANKYRIN REPEAT FAMILY PROTEIN	R0I7L7	R0I7L7_9BRAS
IP-MS1&IP-MS2	Carub.0003s0997	AT3G10740	ASD1	alpha-L-arabinofuranosidase 1	R0I7Q1	R0I7Q1_9BRAS
IP-MS1&IP-MS2	Carub.0003s1761	AT3G16740	FOA2	F-box and associated interaction domains-containing protein	R0GA16	R0GA16_9BRAS
IP-MS1&IP-MS2	Carub.0003s0016	AT3G01920	-	DHBP synthase RibB-like alpha/beta domain-containing protein	R0HSI6	R0HSI6_9BRAS
IP-MS1&IP-MS2	Carub.0003s1959	AT3G19710	BCAT4	branched-chain aminotransferase4	R0I4D1	R0I4D1_9BRAS
IP-MS1&IP-MS2	Carub.0003s3016	AT2G16390	DRD1	SNF2 domain-containing protein / helicase domain-containing protein	R0GAX9	R0GAX9_9BRAS
IP-MS1&IP-MS2	Carub.0003s2324	AT3G23070	CFM3A	CRM family member 3A	R0GBD3	R0GBD3_9BRAS
IP-MS1&IP-MS2	Carub.0313s0001	AT1G09040	-	arginine-glutamic acid dipeptide repeat protein	R0GL51	R0GL51_9BRAS
IP-MS1&IP-MS2	Carub.0005s0099	AT2G01980	SOS1	sodium proton exchanger, putative (NHX7) (SOS1)	R0HHY8	R0HHY8_9BRAS
IP-MS1&IP-MS2	Carub.0005s2761	AT3G60850	-	diaminopropionate ammonia-lyase. / diaminopropionatase	R0FNI4	R0FNI4_9BRAS
IP-MS1&IP-MS2	Carub.0005s1470	AT5G63370	CDKG1	cyclin-dependent kinase G1	R0FMC6;R0FNJ4;R0HIG1	R0FMC6_9BRAS;R0FNJ4_9BRAS;R0HIG1_9BRAS
IP-MS1&IP-MS2	Carub.0005s0447	AT3G26490	-	Phototropic-responsive NPH3 family protein	R0HIM0	R0HIM0_9BRAS
IP-MS1&IP-MS2	Carub.0005s0417	AT3G26290	CYP71B26	cytochrome P450, family 71, subfamily B, polypeptide 26	R0FP46	R0FP46_9BRAS
IP-MS1&IP-MS2	Carub.0005s0102	AT2G02010	GAD4	glutamate decarboxylase 4	R0FN01	R0FN01_9BRAS
IP-MS1&IP-MS2	Carub.0005s2096	AT3G54360	NCA1	NO CATALASE ACTIVITY 1	R0FNQ4	R0FNQ4_9BRAS
IP-MS1&IP-MS2	Carub.0005s2191	AT3G55250	PDE329	calcium homeostasis regulator	R0H596	R0H596_9BRAS
IP-MS1&IP-MS2	Carub.0005s0444	AT3G26460	-	MLP-LIKE PROTEIN 328-RELATED	R0FRR2;R0HI53	R0FRR2_9BRAS;R0HI53_9BRAS
IP-MS1&IP-MS2	Carub.0005s0040	AT2G01440	RECG	ATP-dependent DNA helicase RecG (recG); DEAD/DEAH box RNA helicase family protein	R0HJC3	R0HJC3_9BRAS
IP-MS1&IP-MS2	Carub.0005s1118	AT5G60410	SIZ1	DNA-binding protein with MIZ/SP-RING zinc finger, PHD-finger and SAP domain-containing protein	R0HKN6	R0HKN6_9BRAS
IP-MS1&IP-MS2	Carub.0002s0402	AT1G61140	EDA16	SNF2 domain-containing protein / helicase domain-containing protein / zinc finger protein-like protein	R0HUH6;R0IAA6	R0HUH6_9BRAS;R0IAA6_9BRAS
IP-MS1&IP-MS2	Carub.0002s2105	AT1G74260	PUR4	purine biosynthesis 4	R0GD19	R0GD19_9BRAS
IP-MS1&IP-MS2	Carub.0002s2420	AT1G77320	MEI1	transcription coactivator	R0I6B7	R0I6B7_9BRAS
IP-MS1&IP-MS2	Carub.0002s0638	AT1G58220	-	Homeodomain-like superfamily protein	R0IAE0	R0IAE0_9BRAS
IP-MS1&IP-MS2	Carub.0002s1201	AT5G39550	VIM	Zinc finger (C3HC4-type RING finger) family protein	R0HV58	R0HV58_9BRAS
IP-MS1&IP-MS2	Carub.0002s2221	AT1G75370	SFH5	Sec14p-like phosphatidylinositol transfer family protein	R0HYE5	R0HYE5_9BRAS
IP-MS1&IP-MS2	Carub.0002s1882	AT1G72040	dNK	P-loop containing nucleoside triphosphate hydrolases superfamily protein	R0IE40	R0IE40_9BRAS
IP-MS1&IP-MS2	Carub.0002s1238	AT1G66350	RGL1	RGA-like 1	R0HYV0	R0HYV0_9BRAS
IP-MS1&IP-MS2	Carub.0002s2013	AT1G73390	BROX	Endosomal targeting BRO1-like domain-containing protein	R0IAP1	R0IAP1_9BRAS
IP-MS1&IP-MS2	Carub.0002s2164	AT1G74860	-	BNAA07G31790D PROTEIN	R0HZE9	R0HZE9_9BRAS
IP-MS1&IP-MS2	Carub.0002s1356	AT1G67280	GLYI6	Glyoxalase/Bleomycin resistance protein/Dioxygenase superfamily protein	R0GHY1	R0GHY1_9BRAS
IP-MS1&IP-MS2	Carub.0002s0462	AT1G60710	ATB2	NAD(P)-linked oxidoreductase superfamily protein	R0HZR2	R0HZR2_9BRAS
IP-MS1&IP-MS2	Carub.0002s0702	AT1G57610	MCU2	MItochondrial Calcium Uptake2	R0IBL9	R0IBL9_9BRAS
IP-MS1&IP-MS2	Carub.0002s0957	AT1G54390	ING2	PHD finger protein-like protein	R0IBS2	R0IBS2_9BRAS
IP-MS1&IP-MS2	Carub.0002s2625	AT1G79390	-	unknown protein	R0ICF0	R0ICF0_9BRAS
IP-MS1&IP-MS2	Carub.0002s0319	AT1G61850	-	CALCIUM-INDEPENDENT PHOSPHOLIPASE A2-GAMMA; phospholipase A I-like protein	R0GDU6	R0GDU6_9BRAS
IP-MS1&IP-MS2	Carub.0002s1831	AT1G71460	-	Pentatricopeptide repeat (PPR-like) superfamily protein	R0I7E0	R0I7E0_9BRAS
IP-MS1&IP-MS2	Carub.0002s2010	AT1G73360	HDG11	homeodomain GLABROUS 11	R0I7H5	R0I7H5_9BRAS
IP-MS1&IP-MS2	Carub.0002s1812	AT1G71240	-	unknown protein	R0HWF0	R0HWF0_9BRAS
IP-MS1&IP-MS2	Carub.0002s0768	AT1G56460	-	HIT zinc finger and PAPA-1-like domain-containing protein	R0IC22	R0IC22_9BRAS
IP-MS1&IP-MS2	Carub.0002s1499	AT1G68480	JAG	C2H2 and C2HC zinc fingers superfamily protein	R0I8D0	R0I8D0_9BRAS
IP-MS1&IP-MS2	Carub.0002s0137	AT1G63490	LID	transcription factor jumonji (jmjC) domain-containing protein	R0HXP3	R0HXP3_9BRAS
IP-MS1&IP-MS2	Carub.0002s2776	AT1G79750	NADP-ME4	NADP-malic enzyme 4	R0ID91	R0ID91_9BRAS
IP-MS1&IP-MS2	Carub.0002s2589	AT1G79020	EPC	Enhancer of polycomb-like transcription factor protein	R0GFR2	R0GFR2_9BRAS
IP-MS1&IP-MS2	Carub.0002s1119	AT1G65450	GLC	HXXXD-type acyl-transferase family protein	R0GGN5	R0GGN5_9BRAS
IP-MS1&IP-MS2	Carub.0004s2928	AT2G46560	-	RABCONNECTIN-3A; transducin family protein / WD-40 repeat family protein	R0FU74	R0FU74_9BRAS
IP-MS1&IP-MS2	Carub.0004s1313	AT2G31830	5PTase14	endonuclease/exonuclease/phosphatase family protein	R0HAR9	R0HAR9_9BRAS
IP-MS1&IP-MS2	Carub.0004s0610	AT2G41520	TPR15	tetratricopeptide repeat 15; Heat shock protein DnaJ with tetratricopeptide repeat	R0HVJ8	R0HVJ8_9BRAS
IP-MS1&IP-MS2	Carub.0004s2904	AT2G46340	SPA1	SPA (suppressor of phyA-105) protein family	R0HQT4	R0HQT4_9BRAS
IP-MS1&IP-MS2	Carub.0004s1105	AT2G29970	SMXL7	Double Clp-N motif-containing P-loop nucleoside triphosphate hydrolases superfamily protein; SMAX1-like 7	R0HAV5	R0HAV5_9BRAS
IP-MS1&IP-MS2	Carub.0004s0187	AT2G22740	SUVH6	SU(VAR)3-9 homolog 6	R0FUN3	R0FUN3_9BRAS
IP-MS1&IP-MS2	Carub.0004s0322	AT2G24050	eIFiso4G2	MIF4G domain-containing protein / MA3 domain-containing protein	R0HRK9	R0HRK9_9BRAS
IP-MS1&IP-MS2	Carub.0004s0926	AT2G28350	ARF10	auxin response factor 10	R0FVP9	R0FVP9_9BRAS
IP-MS1&IP-MS2	Carub.0004s0294	AT2G23760	BLH4	BEL1-like homeodomain 4	R0FUV8	R0FUV8_9BRAS
IP-MS1&IP-MS2	Carub.0004s1079	AT1G70770	-	transmembrane protein (Protein of unknown function DUF2359, transmembrane)	R0FVG3;R0HSB7	R0FVG3_9BRAS;R0HSB7_9BRAS
IP-MS1&IP-MS2	Carub.0004s2164	AT2G39570	ACR9	ACT domain-containing protein	R0HPJ8	R0HPJ8_9BRAS
IP-MS1&IP-MS2	Carub.0004s0605	AT2G26210	-	Ankyrin repeat family protein	R0HEF0	R0HEF0_9BRAS
IP-MS1&IP-MS2	Carub.0004s2206	AT2G39930	ISA1	isoamylase 1	R0HXA3	R0HXA3_9BRAS
IP-MS1&IP-MS2	Carub.0004s0445	AT2G24830	-	ZINC FINGER CCCH DOMAIN-CONTAINING PROTEIN 22	R0HV88	R0HV88_9BRAS
IP-MS1&IP-MS2	Carub.0008s0028	AT5G47490	-	RGPR-like protein; Vesicle coat trafficking protein Sec16 mid-region (Sec16)	R0EVH0	R0EVH0_9BRAS
IP-MS1&IP-MS2	Carub.0008s1822	AT5G57710	SMAX1	SUPPRESSOR OF MAX2 1	R0GJ94	R0GJ94_9BRAS
IP-MS1&IP-MS2	Carub.0008s1305	AT5G52882	-	P-loop containing nucleoside triphosphate hydrolases superfamily protein	R0F1X9	R0F1X9_9BRAS
IP-MS1&IP-MS2	Carub.0008s2114	AT5G60450	ARF4	auxin response factor 4	R0G8Q0	R0G8Q0_9BRAS
IP-MS1&IP-MS2	Carub.0008s0687	AT5G42310	CRP1	Chloroplast RNA Processing 1	R0GMT2	R0GMT2_9BRAS
IP-MS1&IP-MS2	Carub.0008s2770	AT5G66810	-	CTLH, C-terminal LisH motif // CTLH/CRA C-terminal to LisH motif domain	R0EV73	R0EV73_9BRAS
IP-MS1&IP-MS2	Carub.0008s1884	AT5G58300	-	Leucine-rich repeat protein kinase family protein	R0G928	R0G928_9BRAS
IP-MS1&IP-MS2	Carub.0008s0804	AT5G48460	FIM2	Actin binding Calponin homology (CH) domain-containing protein	R0GPH9	R0GPH9_9BRAS
IP-MS1&IP-MS2	Carub.0008s1932	AT5G58700	PLC4	phosphatidylinositol-speciwc phospholipase C4	R0GJB1	R0GJB1_9BRAS
IP-MS1&IP-MS2	Carub.0008s0310	AT5G45110	NPR3	NPR1-like protein 3	R0EVF8	R0EVF8_9BRAS
IP-MS1&IP-MS2	Carub.0008s2010	AT5G59430	TRP1	telomeric repeat binding protein 1	R0G9B9	R0G9B9_9BRAS
IP-MS1&IP-MS2	Carub.0008s2758	AT5G66920	SKS17	SKU5 similar 17	R0EWC7	R0EWC7_9BRAS
IP-MS1&IP-MS2	Carub.0008s2632	AT5G65470	-	O-fucosyltransferase family protein	R0GPW7	R0GPW7_9BRAS
IP-MS1&IP-MS2	Carub.0008s2542	AT5G64630	FAS2	Transducin/WD40 repeat-like superfamily protein	R0G9Q8;R0GLW4	R0G9Q8_9BRAS;R0GLW4_9BRAS
IP-MS1&IP-MS2	Carub.0008s2295	AT5G62260	AHL6	AT hook motif DNA-binding family protein	R0GN06	R0GN06_9BRAS
IP-MS1&IP-MS2	Carub.0008s0467	AT2G05830	MTI1	5-METHYLTHIORIBOSE-1-PHOSPHATE-ISOMERASE1; NagB/RpiA/CoA transferase-like superfamily protein	R0GAD6	R0GAD6_9BRAS
IP-MS1&IP-MS2	Carub.0008s2287	AT5G62180	CXE20	carboxyesterase 20	R0EXR3	R0EXR3_9BRAS
IP-MS1&IP-MS2	Carub.0008s0456	AT5G43990	SUVR2	SET-domain containing protein lysine methyltransferase family protein	R0GTH0	R0GTH0_9BRAS
IP-MS1&IP-MS2	Carub.0008s1432	AT5G54060	UF3GT	UDP-glucose:flavonoid 3-o-glucosyltransferase	R0GQP5	R0GQP5_9BRAS
IP-MS1&IP-MS2	Carub.0008s0012	AT5G47660	-	Homeodomain-like superfamily protein	R0EUC7	R0EUC7_9BRAS
IP-MS1&IP-MS2	Carub.0008s0366	AT5G44630	-	alpha-barbatene/beta-chamigrene/thujopsene synthase (BS, TPS11)	R0GUH0	R0GUH0_9BRAS
IP-MS1&IP-MS2	Carub.0008s2243	AT5G61740	ABCA10	ABC TRANSPORTER A FAMILY MEMBER 10	R0F0E1	R0F0E1_9BRAS
IP-MS1&IP-MS2	Carub.0008s2205	AT5G61380	TOC1	TIMING OF CAB EXPRESSION 1; pseudo-response regulator 1 (TOC1, APRR1)	R0GV80	R0GV80_9BRAS
