# Supplementary material
Source: Research Square preprint supplement (doi:10.21203/rs.3.rs-8265099/v1)
Supplement: Supplementary file 5 [file 8f6cb06a9167e8d9249c466b.docx]

**Supplementary Table 1. Primers used in this study.**

| **Primer** | **Sequence (5’ to 3’)** | **Experiment** |
| --- | --- | --- |
| pCrJAG-GUS-F | CCTCTAGAGTCGACCTGCAGATTACACAATTTTCCCAATAAACT | Plasmid Construction |
| pCrJAG-GUS-R | CTCAGATCTACCATGGAGTGGAGTGAGATTGGCGTGAGATAA | Plasmid Construction |
| pCrJAG-F | ATCCTCTAGAGTCGACATTACACAATTTTCCCAATAAACT | Plasmid Construction |
| pCrJAG-R | AGTGAGATTGGCGTGAGATAA | Plasmid Construction |
| CrJAG-CDS-F | TCTCACGCCAATCTCACTATGAGGCATGAGGAGAATTACTT | Plasmid Construction |
| CrJAG-CDS-R | GTCAGATCTACCATGGCTCCGAGCGAGTGATGATCTTGGA | Plasmid Construction |
| CrJAG-geno-F | GAAGTCTTATCTCACGCCAATC | Genotyping |
| CrJAG-geno-R | CATGTAGGATCAATGGCGTTTAGACA | Genotyping |
| CrJAG-BD-99-F | CATGGAGGCCGAATTCATGGTGTACGAATGTCGATTTTGTTCAC | Y2H |
| CrJAG-BD-99-R | GCAGGTCGACGGATCCCTACAATGTCTCGGTCTCCCTCTCTT | Y2H |
| CrJAG-BD-150-R | GCAGGTCGACGGATCCCTACACCTTCCCACTCTCATCTTT | Y2H |
| CrJAG-BD-253-F | CATGGAGGCCGAATTCATGAGGCATGAGGAGAATTACTTA | Y2H |
| CrJAG-BD-253-R | GCAGGTCGACGGATCCCTATGTCTCGGTCTCCCTCTCTT | Y2H |
| CrJAG -BD-516-F | AAGATGAGAGTGGGAAGGTGTTGAATCAAGCTCGTCAACTG | Y2H |
| CrJAG- -BD-516-R | GCAGGTCGACGGATCCTCAGAGCGAGTGATGATCTTG | Y2H |
| CrJAG-BD-168-F | CATGGAGGCCGAATTCATGTGTGTTGGTGCACCCGTTG | Y2H |
| CrJAG-BD-168-R | GCAGGTCGACGGATCCTCAGAGCGAGTGATGATCTTGGA | Y2H |
| CrJAG-BD-702-F | CATGGAGGCCGAATTCATGAGGCATGAGGAGAATTACTTAGACC | Y2H |
| CrJAG-BD-702-R | GCAGGTCGACGGATCCCTAACGCTGCCGTGAAGCGTC | Y2H |
| CrJAG-BD-591-R | GCAGGTCGACGGATCCCTAAGTGTAGCTCGGTTCCACAGGACT | Y2H |
| CrJAG-BD-327-F | CATGGAGGCCGAATTCATGTACTCTTCAAACCAATACTCTCCTCAT | Y2H |
| CrJAG-BD-396-R | CACTAAGTTTGTTGAGGAGCTTCCA | Y2H |

| CrJAG-BD-153-F | CATGGAGGCCGAATTCATGTTGAATCAAGCTCGTCAACTGGT | Y2H |
| --- | --- | --- |
| CrJAG-BD-288-R | GCAGGTCGACGGATCCCTAGGTTATGGTATCGTTACGGTAGAC | Y2H |
| CrJAG-BD-369-F | CATGGAGGCCGAATTCATGCCACCTGGAATTTCACCTTTTGGCTA | Y2H |
| CrJAG-BD-369-R | GCAGGTCGACGGATCCCTACACTAAGTTTGTTGAGGAGCTTCCA | Y2H |
| CrJAG-BD-354-R | GCAGGTCGACGGATCCCTATGAGTAAACCGACCGGTACAT | Y2H |
| CrJAG-BD-168-F1 | ACCGGTCGGTTTACTCATGTGTTGGTGCACCCGTTG | Y2H |
| CrJAG-BD-354-R1 | TGAGTAAACCGACCGGTACAT | Y2H |
| CrJAG-BD-252-F | ACCGGTCGGTTTACTCAAGAAGCATCTCTCCAAACCCTAATCTC | Y2H |
| CrJAG-BD-252-F1 | ACGATACCATAACCAGAAGCATCTCTCCAAACCCTAATCTC | Y2H |
| CrJAG-BD-288-R1 | GGTTATGGTATCGTTACGGTAGAC | Y2H |
| CrJAG-BD-168-F2 | ACGATACCATAACCTGTGTTGGTGCACCCGTTG | Y2H |
| CrMSI1-AD-F | GGAGGCCAGTGAATTCATGGGGAAAGATGAAGAGGAAATG | Y2H |
| CrMSI1-AD-R | CGAGCTCGATGGATCCCTAAGAAGCCTTTGATGGTTCTTCC | Y2H |
| CrMSI2-AD-F | GGAGGCCAGTGAATTCATGGCGGATAAAGGTAAGGA | Y2H |
| CrMSI2-AD-R | CGAGCTCGATGGATCCTTAGTTTTCATGACTGGTATGTAAAATATC | Y2H |
| CrMSI3-AD-F | GGAGGCCAGTGAATTCATGGCGGCAGAAGAAGGTAAA | Y2H |
| CrMSI3-AD-R | CGAGCTCGATGGATCCTCATTTCTGGTTTTCATTGGAATGT | Y2H |
| CrMSI4-AD-F | GGAGGCCAGTGAATTCATGGAGAGCGACGAAGCAGCAGCA | Y2H |
| CrMSI4-AD-R | CGAGCTCGATGGATCCTCAAGGCTTGGAGGCACAAGTCAT | Y2H |
| CrMSI5-AD-F | GGAGGCCAGTGAATTCATGGAGAGCGAAGAAGCAGATT | Y2H |
| CrMSI5-AD-R | CGAGCTCGATGGATCCTCAAGGCTTGGAGGTACATGTG | Y2H |
| CrJAG-DBD-F | TCTCACGCCAATCTCACTATGAGAAAGAAGAAAGGGAGTAAAGAAGG | Plasmid Construction |
| CrJAG-DBD-R | GTGGCGATTCATGTGGC | Plasmid Construction |
| CrMSI2-CDS-DBD-F | GCCACATGAATCGCCACGCGGATAAAGGTAAGGAGGAG | Plasmid Construction |
| CrMSI2-CDS-DBD-R | GTCAGATCTACCATGGCTCCGTTTTCATGACTGGTATGTAAAATAT | Plasmid Construction |
| CrMSI3-CDS- DBD-F | GCCACATGAATCGCCACGCGGCAGAAGAAGGTAAAGAGG | Plasmid Construction |
| CrMSI3-CDS- DBD-R | GTCAGATCTACCATGGCTCCTTTCTGGTTTTCATTGGAATGTTG | Plasmid Construction |
| CrJAG-YFP-F | CATTTACGAACGATAGTTAATTAAATGAGGCATGAGGAGAATTACTTAGAC | BiFC |
| CrJAG-YFP-R | CTGCCACCTCCTCCACTAGTGAGCGAGTGATGATCTTGGAAA | BiFC |
| CrMSI2-YFP-F | CATTTACGAACGATAGTTAATTAAATGGCGGATAAAGGTAAGGAG | BiFC |
| CrMSI2-YFP-R | CTGCCACCTCCTCCACTAGTGTTTTCATGACTGGTATGTAAAATATCTTC | BiFC |
| CrMSI3-YFP-F | CATTTACGAACGATAGTTAATTAAATGGCGGCAGAAGAAGGTAAA | BiFC |
| CrMSI3-YFP-R | CTGCCACCTCCTCCACTAGTTTTCTGGTTTTCATTGGAATGTTGT | BiFC |
| CrMSI4-YFP-F | CATTTACGAACGATAGTTAATTAAATGGAGAGCGACGAAGCAG | BiFC |
| CrMSI4-YFP-R | CTGCCACCTCCTCCACTAGTAGGCTTGGAGGCACAAGTCA | BiFC |
| YFP-C-R | ATGTTGTGGCGGATCTTGAA | sequencing |
| YFP-N-R | AACTTGTGGCCGTTTACGTC | sequencing |
| pCrMSI2-GUS-F | CCTCTAGAGTCGACCTGCAGGAGAAGATATACCAAATTCTCAGGAGTC | Plasmid Construction |
| pCrMSI2-GUS-R | CTCAGATCTACCATGGTATCTCTCTCTCGCCTCTCAATCT | Plasmid Construction |
| pCrMSI3-GUS-F | CCTCTAGAGTCGACCTGCAGACTTGGAATATTTTTTGTTCCGATG | Plasmid Construction |
| pCrMSI3-GUS-R | CTCAGATCTACCATGGATCTCTAAGTCTCTCGATCGTAGTTTCT | Plasmid Construction |
| pCrMSI4-GUS-F | CCTCTAGAGTCGACCTGCAGGGAAGGAAAGAAAAAGACCGAGCT | Plasmid Construction |
| pCrMSI4-GUS-R | CTCAGATCTACCATGGTTTCCTCTCTCTTTTGTCTTTTTCTTCACT | Plasmid Construction |
| GUS-R | AAGGGTCCTAACCAAGAA | sequencing |

| CrMSI4-HA-R | GAACATCGTATGGGTAGGTACCAGGCTTGGAGGCACAAGTCA | Co-IP |
| --- | --- | --- |
| Ad2.1 | CAAGCAGAAGACGGCATACGAGATTCGCCTTAGTCTCGTGGGCTCGGAGATGT | CUT & Tag |
| Ad2.3 | CAAGCAGAAGACGGCATACGAGATTTCTGCCTGTCTCGTGGGCTCGGAGATGT | CUT & Tag |
| Ad2.10 | CAAGCAGAAGACGGCATACGAGATCAGCCTCGGTCTCGTGGGCTCGGAGATGT | CUT & Tag |
| N501 | AATGATACGGCGACCACCGAGATCTACACTAGATCGCTCGTCGGCAGCGTCAGATGTG | CUT & Tag |
| N502 | AATGATACGGCGACCACCGAGATCTACACCTCTCTATTCGTCGGCAGCGTCAGATGTG | CUT & Tag |
| N503 | AATGATACGGCGACCACCGAGATCTACACTATCCTCTTCGTCGGCAGCGTCAGATGTG | CUT & Tag |
| N504 | AATGATACGGCGACCACCGAGATCTACACAGAGTAGATCGTCGGCAGCGTCAGATGTG | CUT & Tag |
| N505 | AATGATACGGCGACCACCGAGATCTACACGTAAGGAGTCGTCGGCAGCGTCAGATGTG | CUT & Tag |
| N506 | AATGATACGGCGACCACCGAGATCTACACACTGCATATCGTCGGCAGCGTCAGATGTG | CUT & Tag |
| 35S-CrJAG-GFP-F | AGGACAGCCCAAGCTTATGAGGCATGAGGAGAATTACTTAGAC | Plasmid Construction |
| 35S-CrJAG-GFP-R | CTTTACTCATGTCGACGAGCGAGTGATGATCTTGGAAA | Plasmid Construction |
| 35S-CrMSI2-GFP-F | AGGACAGCCCAAGCTTATGGCGGATAAAGGTAAGGAG | Plasmid Construction |
| 35S-CrMSI2-GFP-R | CTTTACTCATGTCGACGTTTTCATGACTGGTATGTAAAATATCTT | Plasmid Construction |
| 35S-CrMSI3-GFP-F | AGGACAGCCCAAGCTTATGGCGGCAGAAGAAGGTAAA | Plasmid Construction |
| 35S-CrMSI3-GFP-R | CTTTACTCATGTCGACTTTCTGGTTTTCATTGGAATGTTGT | Plasmid Construction |
| 35S-CrMSI4-GFP-F | AGGACAGCCCAAGCTTATGGAGAGCGACGAAGCAG | Plasmid Construction |
| 35S-CrMSI4-GFP-R | CTTTACTCATGTCGACAGGCTTGGAGGCACAAGTCA | Plasmid Construction |
| CrAUR2-ChIP-A-F | CGGAACCAAGTTCGTTGAAGAG | ChIP-qPCR |
| CrAUR2-ChIP-A-R | CTTGAATCACATCTCCAAAATTTGAACC | ChIP-qPCR |
| CrAUR2-ChIP-B-F | GTTGATTTAGTCAGCCTGCGAAACA | ChIP-qPCR |
| CrAUR2-ChIP-B-R | TGAGATTTGGATCCAATGGAGAAATTTA | ChIP-qPCR |
| CrAUR2-ChIP-C-F | CCACATTCACCATAGTCACTAAGAAAGT | ChIP-qPCR |
| CrAUR2-ChIP-C-R | AAAACTCTGATAGGGGATCAATGC | ChIP-qPCR |
| pCrAUR2-GUS-F | CCTCTAGAGTCGACCTGCAGACACCATAAGAAGACTCCAA | Plasmid Construction |
| pCrAUR2-GUS-R | CTCAGATCTACCATGGTGGAAAGAGATCGATTGAGC | Plasmid Construction |
